# Supplementary material for: ‘When will this end? Will it end?’ The impact of the March–June 2020 UK COVID-19 lockdown response on mental health: a longitudinal survey of mothers in the Born in Bradford study
Source: PubMed Central journal article supplement (PMC8753090; doi:10.1136/bmjopen-2020-047748), 2022-01-11
Supplement: bmjopen-2020-047748.draft_revisions.pdf [file bmjopen-2020-047748.draft_revisions.pdf]

# BMJ Open

BMJ Open is committed to open peer review. As part of this commitment we make the peer review history of every article we publish publicly available.

When an article is published we post the peer reviewers' comments and the authors' responses online. We also post the versions of the paper that were used during peer review. These are the versions that the peer review comments apply to.

The versions of the paper that follow are the versions that were submitted during the peer review process. They are not the versions of record or the final published versions. They should not be cited or distributed as the published version of this manuscript.

BMJ Open is an open access journal and the full, final, typeset and author-corrected version of record of the manuscript is available on our site with no access controls, subscription charges or pay-per-view fees (<http://bmjopen.bmj.com>).

If you have any questions on BMJ Open's open peer review process please email [info.bmjopen@bmj.com](mailto:info.bmjopen@bmj.com)

# BMJ Open

**“When will this end? Will it end?” The impact of the March-June 2020 UK Covid-19 lockdown response on mental health: a longitudinal survey of mothers in the Born in Bradford study.**

|                               |                                                                                                                                                                                                                                                                                                                                                                                                                                                                                                                                                                                                                                                                                                                                                                                                                                                                                                                                                                                                                                                                                                                                                                                                                                                         |
|-------------------------------|---------------------------------------------------------------------------------------------------------------------------------------------------------------------------------------------------------------------------------------------------------------------------------------------------------------------------------------------------------------------------------------------------------------------------------------------------------------------------------------------------------------------------------------------------------------------------------------------------------------------------------------------------------------------------------------------------------------------------------------------------------------------------------------------------------------------------------------------------------------------------------------------------------------------------------------------------------------------------------------------------------------------------------------------------------------------------------------------------------------------------------------------------------------------------------------------------------------------------------------------------------|
| Journal:                      | <i>BMJ Open</i>                                                                                                                                                                                                                                                                                                                                                                                                                                                                                                                                                                                                                                                                                                                                                                                                                                                                                                                                                                                                                                                                                                                                                                                                                                         |
| Manuscript ID                 | bmjopen-2020-047748                                                                                                                                                                                                                                                                                                                                                                                                                                                                                                                                                                                                                                                                                                                                                                                                                                                                                                                                                                                                                                                                                                                                                                                                                                     |
| Article Type:                 | Original research                                                                                                                                                                                                                                                                                                                                                                                                                                                                                                                                                                                                                                                                                                                                                                                                                                                                                                                                                                                                                                                                                                                                                                                                                                       |
| Date Submitted by the Author: | 10-Dec-2020                                                                                                                                                                                                                                                                                                                                                                                                                                                                                                                                                                                                                                                                                                                                                                                                                                                                                                                                                                                                                                                                                                                                                                                                                                             |
| Complete List of Authors:     | Dickerson, Josie; Bradford Institute for Health Research<br>Kelly, Brian; Bradford Institute for Health Research<br>Lockyer, Bridget; Bradford Institute for Health Research<br>Bridges, Sally; Bradford Institute for Health Research<br>Cartwright, Christopher; Bradford Institute for Health Research<br>Willan, Kathryn ; Bradford Institute for Health Research<br>Shire, Katy; Bradford Institute for Health Research<br>Crossley, Kirsty; Bradford Institute for Health Research<br>Bryant, Maria; University of York, Health Sciences<br>Siddiqi, Najma; University of York, Health Sciences; Hull York Medical School<br>Lawlor, Deborah; University of Bristol, MRC Integrative Epidemiology Unit at The University of Bristol; University of Bristol Medical School, Population Health Science<br>Wright, John; Bradford Institute for Health Research<br>McEachan, Rosemary; Bradford Institute for Health Research, Bradford, United Kingdom; University of Bradford Faculty of Life Sciences<br>Sheldon, T; Bradford Institute for Health Research; Queen Mary University of London Barts and The London School of Medicine and Dentistry, Institute of Population Health Sciences<br>Pickett, Kate; University of York, Health Sciences |
| Keywords:                     | COVID-19, MENTAL HEALTH, Depression & mood disorders < PSYCHIATRY, Anxiety disorders < PSYCHIATRY, PUBLIC HEALTH                                                                                                                                                                                                                                                                                                                                                                                                                                                                                                                                                                                                                                                                                                                                                                                                                                                                                                                                                                                                                                                                                                                                        |
|                               |                                                                                                                                                                                                                                                                                                                                                                                                                                                                                                                                                                                                                                                                                                                                                                                                                                                                                                                                                                                                                                                                                                                                                                                                                                                         |

SCHOLARONE™  
Manuscripts

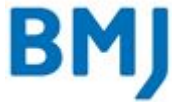

I, the Submitting Author has the right to grant and does grant on behalf of all authors of the Work (as defined in the below author licence), an exclusive licence and/or a non-exclusive licence for contributions from authors who are: i) UK Crown employees; ii) where BMJ has agreed a CC-BY licence shall apply, and/or iii) in accordance with the terms applicable for US Federal Government officers or employees acting as part of their official duties; on a worldwide, perpetual, irrevocable, royalty-free basis to BMJ Publishing Group Ltd ("BMJ") its licensees and where the relevant Journal is co-owned by BMJ to the co-owners of the Journal, to publish the Work in this journal and any other BMJ products and to exploit all rights, as set out in our [licence](#).

The Submitting Author accepts and understands that any supply made under these terms is made by BMJ to the Submitting Author unless you are acting as an employee on behalf of your employer or a postgraduate student of an affiliated institution which is paying any applicable article publishing charge ("APC") for Open Access articles. Where the Submitting Author wishes to make the Work available on an Open Access basis (and intends to pay the relevant APC), the terms of reuse of such Open Access shall be governed by a Creative Commons licence – details of these licences and which [Creative Commons](#) licence will apply to this Work are set out in our licence referred to above.

Other than as permitted in any relevant BMJ Author's Self Archiving Policies, I confirm this Work has not been accepted for publication elsewhere, is not being considered for publication elsewhere and does not duplicate material already published. I confirm all authors consent to publication of this Work and authorise the granting of this licence.

1 **“When will this end? Will it end?” The impact of the March-June 2020 UK Covid-19 lockdown**  
2 **response on mental health: a longitudinal survey of mothers in the Born in Bradford study.**  
3  
4

5 Josie Dickerson<sup>1</sup>, Brian Kelly<sup>1</sup>, Bridget Lockyer<sup>1</sup>, Sally Bridges<sup>1</sup>, Christopher Cartwright<sup>1</sup>, Kathryn Willan<sup>1</sup>,  
6 Katy Shire<sup>1</sup>, Kirsty Crossley<sup>1</sup>, Marian Bryant<sup>1,2</sup>, Najma Siddiqi<sup>3</sup>, Trevor A Sheldon<sup>1,4</sup>, Deborah A Lawlor<sup>5,6,7</sup>,  
7 John Wright<sup>1</sup>, Rosemary RC McEachan<sup>1,8</sup>, Kate E Pickett<sup>1,2</sup> on behalf of the Bradford Institute for Health  
8 Research COVID-19 Scientific Advisory Group (<https://www.bradfordresearch.nhs.uk/c-sag/>).  
9

10  
11 Corresponding author:

12 Josie Dickerson, Bradford Institute for Health Research, Bradford Teaching Hospitals NHS Foundation  
13 Trust, Bradford Royal Infirmary, Duckworth Lane, Bradford, BD9 6RJ, UK.

14 Email: [josie.dickerson@bthft.nhs.uk](mailto:josie.dickerson@bthft.nhs.uk)

15 Telephone: 01274 383916  
16  
17  
18  
19

20 **Addresses**

21  
22 <sup>1</sup> Bradford Institute for Health Research, Bradford Teaching Hospitals NHS Foundation Trust, Bradford  
23 Royal Infirmary, Duckworth Lane, Bradford, UK.

24 <sup>2</sup> Department of Health Sciences, University of York, Department of Health Sciences, Seebohm Rowntree  
25 Building, University of York, Heslington, York, UK.

26 <sup>3</sup> The Hull York Medical School, University of York, Heslington York, UK

27 <sup>4</sup> Institute of Population Health Sciences, Barts and The London School of Medicine and Dentistry, Queen  
28 Mary University London, Yvonne Carter Building, 58 Turner Street, London, UK

29 <sup>5</sup> MRC Integrative Epidemiology Unit at the University of Bristol, Oakfield House, Oakfield Grove, Bristol, ,  
30 UK

31 <sup>6</sup> Population Health Science, Bristol Medical School, University of Bristol, UK

32 <sup>7</sup> Bristol National Institute for Health Research Biomedical Research Centre, UK

33 <sup>8</sup> Faculty of Life Sciences and Health Studies, University of Bradford, Richmond Rd, Bradford, UK  
34  
35  
36  
37  
38

39 **KEYWORDS**

40 COVID-19; mental health; depression; anxiety; health inequalities; ethnic minorities  
41  
42

43 **WORD COUNT:** 4,579  
44  
45  
46  
47  
48  
49  
50  
51  
52  
53  
54  
55  
56  
57  
58  
59  
60

## ABSTRACT

**Objectives** To determine clinically important change in anxiety and depression from before to during the first UK Covid-19 lockdown and factors related to this change, including ethnic differences.

**Design** Pre-Covid and lockdown surveys nested within two longitudinal Born in Bradford cohort studies.

**Participants** 1,860 mothers with a child aged 0-4 or 9-13, 48% Pakistani heritage

**Main outcome measures** Odds ratios (OR) for a clinically important increase (5 points) in depression (PHQ-8) and anxiety (GAD-7) in unadjusted regression analyses, parsimonious multivariate modelling to explore ethnicity and mental ill health and lived experience of mothers captured in open text questions.

**Results** Clinically important depression and anxiety increased from 11% to 19%, and 10% to 16% respectively from before to during the first Covid-19 lockdown. Loneliness during lockdown was most strongly associated with increases in depression (OR: 8.37, 95% CIs: 5.70-12.27) and anxiety (8.50, 5.71-12.65), followed by financial insecurity (6.23, 3.96-9.80; 6.03, 3.82-9.51). Other strongly associated variables included food and housing insecurity, a lack of physical activity and a poor partner relationship.

When level of financial insecurity was taken into account, Pakistani heritage mothers were less likely than White British mothers to experience an increase in depression (0.67, 0.51-0.89) and anxiety (0.73, 0.55-0.97).

Responses to open text highlighted a complex inter-play of health anxieties, mental load, loss of social support and coping strategies, and financial insecurity contributing to mental ill health. Positive aspects of lockdown were also reported, including a more relaxed pace of life.

**Conclusions** Mental ill health has worsened with the Covid-19 lockdown, particularly in those who are lonely, economically insecure and/or of White British ethnicity. Mental health problems may have longer term consequences for public health. Strategies to mitigate adverse impacts of future lockdowns on mental health should focus on those factors we highlight as associated with worsening mental health.

## STRENGTHS AND LIMITATIONS OF THIS STUDY

- Two key longitudinal studies have highlighted that the Covid-19 pandemic and lockdowns have had a negative impact on mental health, particular in younger adults, women and those from low socio-economic circumstances, but with participants of predominantly White European ethnicity.
- Mental ill health is more prevalent in people from ethnic minorities and the socially and economically disadvantaged. The Born in Bradford research programme offers a unique opportunity to investigate the impact of Covid-19 lockdown on mental health in a deprived and ethnically diverse population.
- This is a longitudinal study containing linked data collected before the Covid-19 pandemic and at the beginning of the March-June 2020 lockdown which has allowed us to explore change over that time period in a highly ethnically diverse population, the majority of whom live in the most deprived centiles in the UK.
- Respondents in this study were mothers of children aged 0-5 and/or 9-13 which may limit the wider generalizability, though our findings are broadly similar to those from another longitudinal study that included adult men and women, and the deterioration in mental health reported here is similar to that of other UK studies.
- We are not aware of other studies that have explored longitudinal change in mental health from pre- to during- the Covid-19 lock down in a similar ethnically diverse deprived population.

## Introduction

There is growing concern that the first 'lockdown' measures to control the spread of the Covid-19 pandemic (implemented in the UK between March and June 2020)<sup>1,2</sup> have had unintended consequences including an increase in mental ill health. Several studies since the Covid-19 pandemic began have reported high levels of depression and anxiety<sup>3-7</sup> in the UK. However, the majority of these surveys are either cross-sectional or longitudinal *within* the lockdown period (5-7) with only two studies (3, 4) comparing mental health in the pre-Covid-19 period to mental health during the March-June 2020 Covid-19 lockdown. One of those used office of national statistics data and found worsening mental health in younger adults, those who were financially insecure or had a disability<sup>3</sup>. The second, using data from two prospective cohorts, found worsening mental health during, compared to before the lockdown in younger adults, women, those with pre-existing mental and physical health conditions, those living alone and in socio-economic adversity<sup>4</sup>. In these studies most participants were of white European origin and the larger of the two studies was in a relatively affluent population. Mental ill health is more prevalent in people from ethnic minorities and the socially and economically disadvantaged<sup>8,9</sup>, but no longitudinal research to date has investigated the impact of Covid-19 lockdown on mental health in these populations<sup>10</sup>.

We were able to explore these questions in depth by building on the Born in Bradford research programme which includes two longitudinal birth cohorts of ethnically diverse families living in the city of Bradford, many in deprived circumstances. These cohorts have recent in-depth information on the demographics, socioeconomic status and mental health of participants before the Covid-19 pandemic,<sup>11-13</sup> as well as mental health during the March-June 2020 Covid-19 lockdown<sup>14</sup>, and so offer a unique opportunity to assess the impact of Covid-19 and lockdown longitudinally in a deprived and ethnically diverse population.

We explore the data to:

- Describe changes in the prevalence of depression and anxiety in mothers living in Bradford from before the Covid-19 pandemic to during the March-June 2020 Covid-19 lockdown
  - Identify the variables associated with an increased occurrence of mental ill health in this population, to identify vulnerable groups that may need additional support during subsequent lockdowns.
  - To explore mothers' lived experience during the March-June 2020 Covid-19 lockdown by assessing the frequency of worries and concerns relating to mental ill health obtained through free text responses to open questions.

## Methods

### *Study Design*

A longitudinal study using data collected at two time points before and during the March-June 2020 Covid-19 lockdown from mothers who participated in one of two prospective birth cohort studies in Bradford: Born in Bradford's Growing Up (BiBGU) study with parents of children currently aged 9-13<sup>11,12</sup> and Born in Bradford's Better Start (BiBBS) with parents of children currently aged 0-4.<sup>13</sup>

### *Patient and Public Involvement*

Born in Bradford is a 'people powered' research study; the local community were consulted to identify key research priorities during the March-June 2020 Covid-19 lockdown. This included consultation with key community groups, seldom-heard communities and local policy and decision makers to ensure that the focus of the research was relevant to local needs. The Covid-19 survey and recruitment approach were tested through our established research advisory groups. The findings of the study were also shared with these groups to enhance interpretation and ensure useful dissemination back to the community<sup>14</sup>.

### *Consent*

1 Participants had previously consented for their research data, and routinely collected health and education  
2 data, to be used for research. For the Covid-19 survey, verbal consent was taken for questionnaires  
3 completed over the phone and implied consent was assumed for all questionnaires completed via post or  
4 online.  
5

### 6 *Data Collection*

7  
8 Full details of the data collection and descriptive findings of the March-June 2020 Covid-19 survey can be  
9 found elsewhere<sup>14,15</sup>. In summary:  
10

#### 11 a) *Pre-Covid-19 data*

12 Pre-Covid-19 data for BiBGU participants were derived from two sources: a) participant ethnicity and age,  
13 collected during pregnancy (2007-2011);<sup>11</sup> b) recent follow-up data on mental health (collected between  
14 24<sup>th</sup> June 2017 and 12<sup>th</sup> March 2020).<sup>12</sup> Pre-Covid data for BiBBS participants were taken from data  
15 collected during pregnancy (6<sup>th</sup> January 2016 and 8<sup>th</sup> February 2020).<sup>13</sup> The median time since most recent  
16 pre-Covid data collection was 15 months (range 1 to 35) for BiBGU and 29 months (range 2 to 52) for  
17 BiBBS.  
18  
19

#### 20 b) *March-June 2020 Covid-19 lockdown data collection:*

21 The survey was administered between 10<sup>th</sup> April and 30<sup>th</sup> June 2020 using a combination of emails, text  
22 and phone with a follow-up postal survey. Participants were recruited in their main language wherever  
23 possible. Mental health was measured using the PHQ-8<sup>16</sup> for depression and the GAD-7 for anxiety.<sup>17</sup>  
24 These are widely used measures of the severity of symptoms of depression and anxiety that have been  
25 validated in the general population,<sup>16,17</sup> and in many ethnic minorities including UK residents of Pakistani  
26 heritage.<sup>18</sup> Information was also collected on household circumstances; family relationships; social support  
27 and loneliness; financial, employment, housing and food insecurity; physical health. This contextual  
28 information was captured in self-reported questions administered in the Covid-19 lockdown survey; details  
29 of categories used are detailed in Table 1 and our protocol paper<sup>14</sup>. Information on the participants' lived  
30 experience during lockdown, including their main worries, challenges and any positive aspects of lockdown  
31 were collected using free text questions.  
32  
33  
34  
35

### 36 *Data Analysis*

37 For PHQ-8 and GAD-7 we employed standard categorisations (0 to 4 no depression, 5 to 9 mild  
38 depression, 10-24 moderate-severe depression; 0 to 4 no anxiety, 5 to 9 mild anxiety, 10 to 21 moderate-  
39 severe anxiety)<sup>16,17</sup> but collapsed moderate, moderately severe and severe categories to indicate clinically  
40 important symptoms of depression and anxiety We also used an increase in PHQ-8 and GAD-7 scores of 5  
41 or more points as an indicator of clinically important change in symptoms. This categorisation was chosen  
42 following guidance from previous research and consultation with clinical colleagues<sup>19</sup>. An increase of five  
43 points or more would also result in a change in the categorization of symptoms (e.g. from none to mild, mild  
44 to moderate/severe and vice versa) whilst also capturing changes in severity within the moderate/severe  
45 categories.  
46  
47

48 Ethnicity was coded using Census 2011 categories and categorised as 'White British', 'Pakistani Heritage'  
49 and all other ethnic groups were categorised as 'Other' due to small numbers of a wide range of ethnicities.  
50

51 A number of categories within variables were collapsed for the regression analysis. This included: Quality  
52 of relationship with partner: Average to poor (comprising of 'average', 'poor' and 'very poor'); Loneliness:  
53 Not lonely (comprising of: 'none or almost none of the time' and 'some of the time') and Lonely (comprising  
54 of: 'Most of the time' and 'All or almost all of the time'); Social support: Easy to get support (comprising of:  
55 'Very easy' and 'easy'); and Not easy to get support (comprising of: 'Very difficult', 'Difficult' and 'Possible');  
56 Food insecurity; Secure (Comprising of 'never true' or 'sometimes true' that food didn't last) and insecure  
57 (Comprising of 'Often true' that food didn't last). Housing security: Secure (Comprising: 'Strongly Disagree',  
58 'Disagree' and 'Neither disagree or agree' that I worry about being evicted or having my home  
59 repossessed) and Insecure (comprising of 'Strongly Agree' or 'Agree').  
60



1  
2 Missing data on measures was small for most variables and was not adjusted for in the analyses.  
3  
4

5 We present results of sample characteristics, including depression and anxiety at pre-Covid-19 and Covid-  
6 19 lockdown survey time points. We examined change in depression and anxiety categories between pre-  
7 Covid-19 and Covid-19 lockdown surveys to elucidate the patterns of both positive and negative changes.  
8 We then modelled the odds ratios associated with an increase in PHQ-8 and GAD-7 scores by five or more  
9 points (Model 1). We constructed separate unadjusted models for each outcome and covariate of interest,  
10 considering variables that were associated with a clinically important increase in mental ill health in the  
11 March-June 2020 Covid-19 lockdown survey.<sup>15</sup> Pre-Covid-19 PHQ-8 and GAD-7 scores were controlled for  
12 in each model.  
13

14 In order to explore the association between ethnicity and a clinically important increase in depression and  
15 anxiety in more depth, we conducted parsimonious multivariate modelling exercises. Each model controlled  
16 for one variable associated with such an increase in model 1.  
17

18 All statistical analyses were carried out using Stata 15.<sup>20</sup>  
19

20  
21 Free text responses in the survey were coded using thematic analysis.<sup>21</sup> The first 100 responses were  
22 analysed by one researcher (BL), employing an inductive approach where coding and theme development  
23 were driven by the content of the responses. Two codebooks were developed, one for the questions on the  
24 three biggest worries and recent challenges during lockdown and another smaller codebook for the  
25 question on what had been made more enjoyable and easier during lockdown. The remaining responses  
26 were then coded by three different researchers in order to test the strength and validity of the codebooks.  
27 Through frequent discussion between the researchers about this process, adjustments were made to the  
28 original codebooks so that they were reflective of the total responses. We also used the emergent themes  
29 to illuminate the findings from the quantitative analyses.  
30

### 31 32 *Ethics*

33  
34 This study was approved by the HRA and Bradford/Leeds research ethics committee (Substantial  
35 amendments to: BiBGU 16/YH/0320 and BiBBS 15/YH/0455)  
36  
37

## 38 **Results**

### 39 *Study Population*

40  
41 Of the 2,043 mothers who responded to the March – June 2020 Covid-19 lockdown survey, 1,860 (91%)  
42 had complete surveys and linked data from pre-Covid19 surveys. Of these; 1,316 (71%) were in the BiBGU  
43 cohort (with a child aged 9-13) and 544 (29%) were in the BiBBS cohort (with n child aged 0-4). The  
44 mothers had a mean age of 37.5 years (SD 6.8). 877 (48%) were of Pakistani heritage, 613 (34%) of White  
45 British ethnicity and 320 (18%) of other ethnicities (see Supplemental Table S1). Respondents were  
46 representative of the BiB and BiBBS cohorts.<sup>15</sup>  
47

### 48 *Findings*

49  
50 Moderate / severe depression increased between the pre-Covid-19 and Covid-19 lockdown surveys from  
51 11% (N=212) to 19% (N=349). Rates of mild depression remained similar; while the proportion of those with  
52 no depression decreased from 65% (N=1187) to 56% (N=1001), (Table 1). The rates of moderate/severe  
53 anxiety increased from 10% (N=167) to 16% (N=289). The prevalence of mild anxiety also increased from  
54 16% (N=270) to 23% (N=408), whilst the proportion of participants with no anxiety fell from 75% (N=1280)  
55 to 61% (N=1075), (Table 1).  
56

57 [Table 1 here]  
58  
59  
60



1 Figures 1 and 2 show the change in depression and anxiety categories from the pre-Covid-19 and Covid-19  
2 lockdown surveys. These illustrate that, while rates of depression and anxiety have increased in the study  
3 population, some participants' levels of depression and anxiety have improved.  
4

5 [Figure 1 &2 here]  
6

7 Table 1 provides the sample characteristics included in the unadjusted regression model. The results from  
8 the unadjusted regression models are presented in Table 2. Variables associated with a clinically important  
9 increase in depression and anxiety (reported here in order from the largest to smallest odds ratio) were:  
10 Loneliness, financial insecurity, relationship quality, food insecurity, housing insecurity, little or no physical  
11 activity, lack of social support, unemployment, poor quality housing, pre-Covid-19 financial security, living in  
12 a household with someone clinically vulnerable to Covid-19, being a single parent, and having had to self-  
13 isolate.  
14

15 Variables that were not associated with an increase in depression or anxiety were ethnicity, age, being a  
16 keyworker, living in a large household and job insecurity.  
17

18 [Table 2 here]  
19  
20  
21

22 The results of a multivariate logistic regression model exploring the relationship between ethnicity, financial  
23 insecurity, and increased depression and anxiety can be seen in Table 3. When financial security is  
24 controlled for, we find that Pakistani heritage respondents are less likely to experience an increase in  
25 depression and anxiety compared to White British respondents (0.67, 0.51-0.89) and (0.73, 0.55-0.97).  
26 All other variables that were associated with an increase in model 1 were tested in similar parsimonious  
27 multivariate logistic regression models. When frequency of physical activity was controlled for, Pakistani  
28 mothers are again less likely to experience an increase in depression (0.73, 0.56-0.96), but not anxiety  
29 (0.81 (0.61-1.07) compared to White British mothers. There were no significant ethnic differences in any of  
30 the other models (see supplementary Table S1-S9).  
31

32 [Table 3 here]  
33  
34  
35

36 Free text responses to the question "what are your three biggest worries at the moment" were available for  
37 1799 mothers. Only a small proportion of women identified their mental health issues as one of their  
38 biggest worries, N=105 (6%, 95%CI: 5%-7%), slightly greater in White British mothers, N=51 (8%, 95%CI:  
39 6%-11%) than in mothers of Pakistani heritage, N=32 (4%, 95%CI: 3%-5%). More often, mothers reported  
40 how wider issues and concerns impacted on their mental health and wellbeing:  
41

42 **Health anxieties about Covid-19:** the most commonly reported worry was a fear of bringing the virus  
43 home (e.g. from the shops or from their places of work), and themselves or members of their family  
44 becoming ill or dying, as well as the fear of what would happen to their children if this did happen to them.  
45

46 *I worry about contracting coronavirus particularly whilst at work and either becoming critically myself unwell  
47 or bringing it home to my family*

48 *Feeling anxious about the virus and constantly worrying about my kids which 2 of them have health issues  
49 and are quite vulnerable*

50 *I feel particularly anxious to even step out of the house even for food shopping or taking a walk/exercise*

51 *I worry how this will affect my children. I'm terrified they will be separated as I have 2 children with my ex-  
52 husband and one with my current. So I haven't been outside in 10 weeks.*

53 **Mental load:** mothers often reported the mental load of managing work, home-schooling, childcare and  
54 domestic tasks, without the break provided by children attending school, nursery or other childcare. Being  
55 or feeling stuck inside and unable to move around freely contributed to a sense of suffocation and feeling  
56 overwhelmed, and many mothers acknowledged that this was having a detrimental effect on their mental  
57 health and self-esteem:  
58  
59  
60

1 I'm worried [about] having a nervous breakdown or a panic attack...can't get a break from all the  
2 responsibilities and go somewhere for fresh air even  
3

4 Finding working from home and looking after children very demanding. No time alone. No silence.  
5 Surrounded by people and electronics all my waking hours.

6 I am a keyworker who works five days of week, only while my children are at school. I am becoming  
7 mentally drained/exhausted constantly being on duty, it is impacting my mental health.  
8

9 Homeschooling I am not cut out for this and don't feel good enough  
10

11 **Loss of social support:** The loss of social support caused by lockdown, especially for those who didn't live  
12 with their partner or were single parents was highlighted as causing loneliness and isolation for some.  
13

14 My support network was my partner, who I cannot see due to lockdown.

15 Not able to see my boyfriend - feel isolated and alone once children are in bed with no adult face to face  
16 interaction  
17

18 The isolation and loneliness has been a challenge and having to take care of my child on my own full-time

19 Being a single parent of a disabled child I rely on my social life/friends for my mental wellbeing and I worry  
20 about when it'll be safe to see/hug my immediate family who live locally  
21

22 **Financial and employment insecurity:** Household finances and the stress of unemployment or job  
23 insecurity related to lockdown measures were also a major worry for women. Many families were in debt,  
24 reliant on credit cards and benefits, and in insecure employment before the lockdown measures began and  
25 were only just about getting by prior to the pandemic.  
26

27 I have struggled financially during this time. I would like to not worry about money and bills and shopping  
28 and outgoings. I have enough worries being a full time carer.  
29

30 Worried about the financial impact of covid 19. I am currently furloughed from work but I worry that the virus  
31 will have an impact on the business. My husband is self-employed and is not eligible to any funds.  
32

33 **Being unable to switch off:** Participants described being frightened of the news reports but unable to  
34 switch off, and were wondering when, if ever, things would become normal again:  
35

36 Worry about my mental health, I know I'm struggling. Worry about the future and how this will affect the  
37 country financially. Worry about my children's education & what they've missed out on.  
38

39 All the bad news on the TV, and the death rate on the News. All the information on the news makes me  
40 panic more.  
41

42 When will this end? Will it end?  
43

44 **A loss of coping strategies:** For those who had existing mental health issues before lockdown, the  
45 lockdown measures had often taken away their sources of support, their normal routines and methods of  
46 coping. In addition, some respondents reported being unable to access mental health services due to  
47 Covid-19 and lockdown measures:  
48

49 Mental health - Exercise at the gym was a coping mechanism, now closed. Can do bits at home but nothing  
50 like at the gym. Cannot get any gym equipment - out of stock.

51 Mental Health - struggling to motivate myself and to keep to a routine. Self-destructive behaviour - drink  
52 drugs and binge eating. I am missing my work and colleagues.

53 Not getting my mental health support since the lockdown. My CPN (Community Psychiatric Nurse) not  
54 returning my calls. It has made me a lot worse. I try to talk to my husband so I am not keeping everything  
55 inside  
56

57 Mental health, I have had previous issues in the past and am struggling and don't feel like I can approach  
58 my GP at the minute as it isn't an emergency  
59  
60

1 **Positive aspects of lockdown:** Many participants reported positive aspects to changes enforced by the  
2 lockdown, commenting that they were getting to spend more quality time with their children, were enjoying  
3 a slower pace of life, a more relaxed routine and spending less time driving and commuting.  
4

5 *Life has become a lot more relaxed over the last 3 weeks, no manic mornings trying to get everybody out of*  
6 *the house, time with kids, doing stuff with kids I would normally say 'not now' to. Get to know kids more.*  
7 *More time outside, [doing] jobs in the house that need doing.*

8 *Spending more time with my husband and feeling appreciative of each other and having a relaxed day with*  
9 *the children instead of running to school to mosque and then all the extra clubs it's a more relaxed day.*

11 *Ramadan is the easiest it has ever been, we are free to make up our sleep and not push ourselves too*  
12 *much, had time to do nice things during Ramadan including having a more peaceful time not having to do*  
13 *school runs, be stressed out, my husband had a chance to take a slower pace to life and not get too*  
14 *stressed.*

## 17 DISCUSSION

19 We compared depression and anxiety during the March-June 2020 UK lockdown to pre-Covid19  
20 depression and anxiety data collected in our longitudinal birth cohort studies. We found that clinically  
21 important symptoms of depression and anxiety increased from 11% to 19% and from 11% to 16%,  
22 respectively. The variables that were most strongly associated with a clinically important increase in  
23 depression and anxiety from pre-Covid19 to the March-June 2020 lockdown were loneliness and financial,  
24 insecurity. The prevalence of these key variables was high in our families, highlighting the vulnerabilities  
25 and risk of poorer outcomes from the Covid-19 pandemic in ethnically diverse and deprived families. White  
26 British mothers were found to be more likely to have an increase in depression and anxiety symptoms  
27 when variation in financial insecurity was controlled for. White British mothers were also more likely to have  
28 an increase in depression but not anxiety when levels of physical activity was controlled for. The free text  
29 responses in our Covid-19 lockdown survey allowed us to explore the specificities of poor mental health in  
30 more detail highlighting: acute health anxieties; the mental load of managing multiple roles and  
31 responsibilities; the loss of social support and other coping strategies; pressures of financial and  
32 employment insecurity; and being unable to switch off from the pandemic. These responses highlight the  
33 complexities of how the March-June 2020 lockdown may have impacted on mental health, and also how  
34 some of the positive experiences may have protected some mothers from mental ill health at this time.

36 This is a longitudinal study containing linked data collected before the Covid-19 pandemic and at the  
37 beginning of the March-June 2020 lockdown which has allowed us to explore change over that time period.  
38 It also provides findings from a highly ethnically diverse population, the majority of whom live in the most  
39 deprived centiles in the UK. We are not aware of other studies that have explored longitudinal change in  
40 mental health from pre- to during- the Covid-19 lock down in a similar ethnically diverse deprived population

42 Respondents were mothers of children aged 0-5 and/or 9-13 which may limit the wider generalizability,  
43 though our findings are broadly similar to those from a previous longitudinal study of two UKC cohorts that  
44 included adult men and women (not all of whom were mothers), and found the increased risk of poor  
45 mental health in lockdown to be greater in women<sup>4</sup>. Our pre-COVID19 measures were taken from data  
46 collected over the past 4 years, so we cannot with confidence attribute all changes to the pandemic and the  
47 lockdown. For example, it is possible that some of the difference reflects age related change in the women  
48 and/or their children over time. It is also possible that we have underestimated some of the adverse impact  
49 of lockdown as a significant percentage of the participants were pregnant at baseline, which itself is  
50 associated with raised levels of depression. However, the deterioration in mental health is large and is  
51 similar to that of the ONS study which found that depressive symptoms in the general population of the UK  
52 doubled to 19.6% in June 2020 compared to the same time period in 2019.<sup>3</sup>

54 It is possible that our results are influenced by selection bias given that 28% of those invited to participate  
55 in the Covid-19 survey responded. However these participants were representative of the BiB and BiBBS  
56 cohorts<sup>15</sup>, and have demonstrated a wide variability in most characteristics (Table 1).

58 We will continue to follow our families over time so that we can look at trajectories of change overtime,  
59 including during any future national or regional lockdowns. At time of writing (November 2020), the UK is  
60 under a further nation-wide lockdown, following a period of reduced restrictions during summer 2020 and

1 tighter regional restrictions in the more deprived cities of Northern England, including Bradford, though the  
2 autumn. The impact of further and longer periods of restrictions and lockdowns will be a focus of our study  
3 moving forwards.  
4

5 The increase in depression and anxiety in White British mothers relative to Pakistani mothers, once  
6 financial insecurity and physical activity were controlled, is of interest. Financial insecurity and low levels of  
7 physical activity are higher in our Pakistani families, but the resilience to mental ill health appears to be  
8 greater in Pakistani mothers compared to White British mothers once these variables are accounted for.  
9 We have previously reported that White British mothers are more likely to have their mental ill health  
10 identified by health professionals than South Asian women but that both White British and South Asian  
11 women are equally likely to disclose symptoms in self-report research questionnaires as used here.<sup>22,23</sup> It  
12 is possible that differences in family structure and culture might provide more support in times of adversity,  
13 as we have found in the case of food insecurity previously<sup>24,25</sup>. This hypothesis warrants further  
14 investigation, and longitudinal qualitative research would add real depth to understanding this difference.  
15

16 Our results highlight the public health impact of lockdown on mental health, particularly in those who are  
17 lonely and economically insecure and of White British ethnicity. Mental health problems are in general less  
18 visible than physical symptoms and in particular the physical symptoms related to Covid-19, including the  
19 acutely ill patients in ICUs, but may have more significant longer-term consequences.  
20

21 Government and local councils should consider policies that permit 'social bubbles' that can be  
22 implemented to reduce loneliness for those at risk, and for voluntary services to continue to focus support  
23 to those who are lonely/isolated. Policy and decision makers should also make provision for the continuing  
24 need to support and protect vulnerable families from financial, food and housing insecurity, all of which  
25 were associated with poor mental health in this study. These actions will be increasingly important through  
26 further regional and national lockdowns.  
27  
28  
29  
30  
31  
32  
33  
34  
35  
36  
37  
38  
39  
40  
41  
42  
43  
44  
45  
46  
47  
48  
49  
50  
51  
52  
53  
54  
55  
56  
57  
58  
59  
60

## DISSEMINATION DECLARATION

The findings of the study were also shared with our community research advisory groups to enhance interpretation. We will share our findings with all participants using a combination of social media, infographics posted to participants and community dissemination events

## DATA (AND SOFTWARE) AVAILABILITY

Born in Bradford offer open access to their data resources. Available data and procedures to access this can be found at: <https://borninbradford.nhs.uk/research/how-to-access-data/>

## AUTHOR CONTRIBUTIONS

JD was involved in the concept and study design, design of the data collection tools, overall supervision of the study and data collection, wrote the statistical analysis plan, and drafted and revised the paper. She is guarantor. BK was involved in the design of data collection tools, wrote the statistical analysis plan, conducted all statistical analyses, and drafted and revised the paper. BL devised the coding framework for free text responses, analysed the data and drafted and revised the paper. SB was involved in the concept and study design, design of the data collection tools, supervision of the study and data collection, and reviewing and revising the paper. CC was involved in the concept and study design, and reviewing and revising the paper. KW was involved in design of the data collection tools, data curation, analysis, reviewing and revising the paper. KS was involved in the study design, design of the data collection tools, supervision of the study and data collection, and reviewing and revising the paper. KC was involved in the study design, design of the data collection tools, supervision of the study and data collection, data curation and reviewing and revising the paper. MB involved in the study design, and drafted and revised the paper. NS advised on the clinical significance of changes in mental ill health, revising the statistical analysis plan, and drafted and revised the paper. TS was involved in the concept and study design, supervision and support to junior members of the team and drafted and revised the paper. DAL was involved in the concept and study design, design of the data collection tools, and drafted and revised the paper. JW was involved in the concept and study design, design of the data collection tools, supervision and support to junior members of the team and drafted and revised the paper. RM was involved in the concept and study design, design of the data collection tools, revised the statistical analysis plan, and drafted and revised the paper. KP was involved in the concept and study design, design of the data collection tools, revised the statistical analysis plan, supervision and support to junior members of the team and drafted and revised the paper.

## COMPETING INTERESTS

All authors have completed the ICMJE uniform disclosure form at [www.icmje.org/coi\\_disclosure.pdf](http://www.icmje.org/coi_disclosure.pdf) and declare: all authors had financial support from funding bodies listed below for the submitted work; no financial relationships with any organisations that might have an interest in the submitted work in the previous three years; no other relationships or activities that could appear to have influenced the submitted work.

## FUNDING INFORMATION

This study was funded by The Health foundation Covid-19 Award (2301201), with further contributions from: A Wellcome Trust infrastructure grant (WT101597MA); A joint grant from the UK Medical Research Council (MRC) and UK Economic and Social Science Research Council (ESRC): MR/N024391/1; The National Institute for Health Research under its Applied Research Collaboration Yorkshire and Humber (NIHR200166); ActEarly UK Prevention Research Partnership Consortium (MR/S037527/1); Better Start Bradford through The National Lottery Community Fund. DAL works in a unit that received support from the University of Bristol and UK Medical Research Council (MC\_UU\_00011/6) and is a UK National Institute of Health Research senior Investigator (NF-0616-10102)



## ACKNOWLEDGEMENTS

Born in Bradford is only possible because of the enthusiasm and commitment of the children and parents in BiB. We are grateful to all the participants, parent governors and community research advisory group members, health professionals and researchers who have made Born in Bradford happen.

This report is independent research partly funded by the National Institute for Health Research Yorkshire and Humber ARC. The views expressed in this publication are those of the authors and not necessarily those of the National Institute for Health Research or the Department of Health and Social Care.

## TRANSPARENCY STATEMENT

The lead author (the manuscript's guarantor) affirms that the manuscript is an honest, accurate, and transparent account of the study being reported; that no important aspects of the study have been omitted; and that any discrepancies from the study as originally planned (and, if relevant, registered) have been explained.

For peer review only



## 1. REFERENCES

1. Coronavirus (Covid-19) UK Government Response. <https://www.gov.uk/coronavirus>. Accessed 27.11.20
2. Number of coronavirus (COVID-19) cases and risk in the UK. UK Government Guidance. <https://www.gov.uk/guidance/coronavirus-covid-19-information-for-the-public> . Accessed 27.11.20
3. Office of National Statistics (2020). Coronavirus and depression in adults, Great Britain: June 2020. <https://www.ons.gov.uk/peoplepopulationandcommunity/wellbeing/articles/coronavirusanddepressioninadultsgreatbritain/june2020>. Accessed 27.11.20
4. Kwong ASF, Pearson RM, Adams MJ, et al., Mental health during the COVID-19 pandemic in two longitudinal UK population cohorts. *MedRxiv* 2020; 20133116. doi: 10.1101/2020.06.16.20133116
5. Pierce M, Hope H, Ford T, et al., Mental health before and during the COVID-19 pandemic: a longitudinal probability sample survey of the UK population. *Lancet Psychiatry* 2020, [https://doi.org/10.1016/S2215-0366\(20\)30308-4](https://doi.org/10.1016/S2215-0366(20)30308-4)
6. Mind (2020). The mental health emergency: how has the coronavirus pandemic impacted our mental health? London: Mind. Available at: [mind.org.uk](http://mind.org.uk). Accessed 27.11.20
7. Fancourt D, Steptoe A, Bu F. Trajectories of depression and anxiety during enforced isolation due to COVID-19: longitudinal analyses of 59,318 adults in the UK with and without diagnosed mental illness. *medRxiv* 2020. doi: <https://doi.org/10.1101/2020.06.03.20120923>
8. Bignall T, Jeraj S, Helsby E, Butt J. Racial disparities in mental health: Literature and evidence review. Race Equality Foundation 2019. <https://raceequalityfoundation.org.uk/wp-content/uploads/2020/03/mental-health-report-v5-2.pdf>. Accessed 27.11.20
9. Grey T, Sewell H, Shapiro G, Ashraf F. Mental Health Inequalities Facing U.K. Minority Ethnic Populations Causal Factors and Solutions. *J Psychological Issues in Organizational Culture*. 2013; 3 (S1).
10. Public Health England. COVID-19: mental health and wellbeing surveillance report: <https://www.gov.uk/government/publications/covid-19-mental-health-and-wellbeing-surveillance-report/2-important-findings-so-far#which-population-groups-appear-to-be-disproportionally-affected>. Accessed 27.11.20
11. Wright J, Raynor P, Tuffnell D, et al. Cohort Profile: The Born in Bradford multi-ethnic family cohort study. *International Journal of Epidemiology*, Volume 42, Issue 4, August 2013, Pages 978–991, <https://doi.org/10.1093/ije/dys112>
12. Bird PK, McEachan RRC, Mon-Williams M, Small N, West J, Whincup P, Wright J, Andrews E, Barber SE, Hill LJB *et al*: Growing up in Bradford: protocol for the age 7–11 follow up of the Born in Bradford birth cohort. *BMC Public Health* 2019, 19(1):939.
13. Dickerson J, Bird PK, McEachan RRC, Pickett KE, Waiblinger D, Uphoff E, Mason D, Bryant M, Bywater T, Bowyer-Crane C *et al*: Born in Bradford’s Better Start: an experimental birth cohort study to evaluate the impact of early life interventions. *BMC Public Health* 2016, 16(1):711.
14. McEachan RRC, Dickerson J, Bridges S *et al*. The Born in Bradford COVID-19 Research Study: Protocol for an adaptive mixed methods research study to gather actionable intelligence on the impact of COVID-19 on health inequalities amongst families living in Bradford [version 1; peer review: 3 approved]. *Wellcome Open Res* 2020, 5:191 (<https://doi.org/10.12688/wellcomeopenres.16129.1>)
15. Dickerson J, Kelly B, Lockyer B *et al*. Experiences of lockdown during the Covid-19 pandemic: descriptive findings from a survey of families in the Born in Bradford study [version 1; peer review: 1 approved]. *Wellcome Open Res* 2020, 5:228 (<https://doi.org/10.12688/wellcomeopenres.16317.1>)
16. Kroenke K, Strine TW, Spitzer RL, Williams JBW, Berry JT, Mokdad AH: The PHQ-8 as a measure of current depression in the general population. *Journal of Affective Disorders* 2009, 114(1):163-173.

17. Löwe B, Decker O, Müller S, Brähler E, Schellberg D, Herzog W, Herzberg PY: Validation and Standardization of the Generalized Anxiety Disorder Screener (GAD-7) in the General Population. *Medical Care* 2008, 46(3):266-274.
18. Husain N, Waheed W, Tomenson B, Creed F. The validation of personal health questionnaire amongst people of Pakistani family origin living in the United Kingdom. *Journal of Affective Disorders* 2007, 97: 261-264.
19. McMillan D, Gilbody S, Richards D. Defining successful treatment outcome in depression using the PHQ-9: A comparison of methods. *J. Affective Disorders*. 2010: 127; 122–129
20. StataCorp. 2017. Stata Statistical Software: Release 15. College Station, TX: StataCorp LLC.
21. Braun V, Clarke V: Using thematic analysis in psychology. *Qualitative Research in Psychology* 2006, 3(2):77-101.
22. Prady SL, Pickett KE, Petherick ES, Gilbody S, Croudace T, Mason D, Sheldon TA, Wright J. (2016). Evaluation of ethnic disparities in detection of depression and anxiety in primary care during the maternal period: combined analysis of routine and cohort data. *The British journal of psychiatry*, 208(5), 453-61. DOI 10.1192/bjp.bp.114.158832. PMID 26795424
23. Prady SL, Pickett KE, Gilbody S, Petherick ES, Mason D, Sheldon TA, and Wright J (2016). Variation and ethnic inequalities in treatment of common mental disorders before, during and after pregnancy: combined analysis of routine and research data in the Born in Bradford cohort. *BMC Psychiatry*, 16(99), DOI 10.1186/s12888-016-0805-x PMID 27071711
24. Power M, Uphoff N, Stewart-Knox B et al., Food insecurity and socio-demographic characteristics in two UK ethnic groups: an analysis of women in the Born in Bradford cohort. *Journal of Public Health*, 2017. **40**(1): p. 32-40.
25. Yang T.C, Sahota P, Pickett K, Bryant M. Association of food security status with overweight and dietary intake: exploration of White British and Pakistani-origin families in the Born in Bradford cohort. *Nutrition Journal*, 2018. **17**(1): p. 48.

view only

1 **FIGURE LEGENDS**

2  
3  
4 **Figure 1: PHQ-8 at pre-Covid19 and Covid19 lockdown survey with change between categories**

5  
6 ***Note: This graph presents findings from participants who had complete pre-Covid19 and Covid19***  
7 ***lockdown PHQ-8 scores (N=1730)***  
8  
9

10 **Figure 2: GAD-7 at pre-Covid19 and Covid19 lockdown survey with change between categories**

11  
12 ***Note: This graph presents findings from participants who had complete pre-Covid19 and Covid19***  
13 ***lockdown GAD-7 scores (N=1634)***  
14  
15  
16  
17  
18  
19  
20  
21  
22  
23  
24  
25  
26  
27  
28  
29  
30  
31  
32  
33  
34  
35  
36  
37  
38  
39  
40  
41  
42  
43  
44  
45  
46  
47  
48  
49  
50  
51  
52  
53  
54  
55  
56  
57  
58  
59  
60

For peer review only

Table 1: Sample characteristics

| Sample characteristics                                              | N    | Percentage (95% CI) |
|---------------------------------------------------------------------|------|---------------------|
| <b>Depression category at pre-Covid19 survey (from PHQ-8 score)</b> |      |                     |
| None (PHQ-8 score 0 to 4)                                           | 1187 | 65% (63%-68%)       |
| Mild (PHQ-8 score 5 to 9)                                           | 414  | 23% (21%-25%)       |
| Moderate (PHQ-8 score 10 to 14)                                     | 135  | 7% (6%-9%)          |
| Moderately severe/ severe (PHQ-8 score 15 to 24)                    | 77   | 4% (3%-5%)          |
| Missing                                                             | 47   |                     |
| Total                                                               | 1860 | 100%                |
| <b>Depression category at lockdown survey (from PHQ8 score)</b>     |      |                     |
| None (PHQ-8 score 0 to 4)                                           | 1001 | 56% (54%-59%)       |
| Mild (PHQ-8 score 5 to 9)                                           | 425  | 24% (22%-26%)       |
| Moderate (PHQ-8 score 10 to 14)                                     | 199  | 11% (10%-13%)       |
| Moderately severe/ severe (PHQ-8 score 15 to 24)                    | 150  | 8% (7%-10%)         |
| Missing                                                             | 85   |                     |
| Total                                                               | 1860 | 100%                |
| <b>Anxiety category at pre-Covid19 survey (from GAD7 score)</b>     |      |                     |
| None (GAD-7 score 0 to 4)                                           | 1280 | 75% (72%-77%)       |
| Mild (GAD-7 score 5 to 9)                                           | 270  | 16% (14%-18%)       |
| Moderate (GAD-7 score 10 to 14)                                     | 100  | 6% (5%-7%)          |
| Severe (GAD-7 score 15 to 21)                                       | 67   | 4% (3%-5%)          |
| Missing                                                             | 143  |                     |
| Total                                                               | 1860 | 100%                |
| <b>Anxiety category at lockdown survey (from GAD7 score)</b>        |      |                     |
| None (GAD-7 score 0 to 4)                                           | 1075 | 61% (58%-63%)       |
| Mild (GAD-7 score 5 to 9)                                           | 408  | 23% (21%-25%)       |
| Moderate (GAD-7 score 10 to 14)                                     | 165  | 9% (8%-11%)         |
| Severe (GAD-7 score 15 to 21)                                       | 124  | 7% (6%-8%)          |
| Missing                                                             | 88   |                     |
| Total                                                               | 1860 | 100%                |
| <b>Ethnicity</b>                                                    |      |                     |
| White British                                                       | 613  | 34% (32%-36%)       |
| Pakistani heritage                                                  | 877  | 48% (46%-51%)       |
| Other                                                               | 320  | 18% (16%-20%)       |
| Missing                                                             | 50   |                     |
| Total                                                               | 1860 | 100%                |
| <b>Age at lockdown survey</b>                                       |      |                     |
| Under 30 yrs.                                                       | 224  | 12% (11%-14%)       |
| 30 to 34 yrs.                                                       | 396  | 21% (19%-23%)       |
| 35 to 39 yrs.                                                       | 516  | 28% (26%-30%)       |
| 40 to 44 yrs.                                                       | 423  | 23% (21%-25%)       |
| 45 yrs. plus                                                        | 301  | 16% (15%-18%)       |
| Total                                                               | 1860 | 100%                |
| <b>Financial security at pre-Covid19 survey</b>                     |      |                     |
| Living comfortably                                                  | 587  | 33% (30%-35%)       |
| Doing alright                                                       | 750  | 42% (39%-44%)       |
| Just about getting by                                               | 342  | 19% (17%-21%)       |

|    |                                                                               |       |               |
|----|-------------------------------------------------------------------------------|-------|---------------|
| 1  | Finding it quite/ very difficult                                              | 125   | 7% (6%-8%)    |
| 2  | Missing                                                                       | 56    |               |
| 3  | Total                                                                         | 1860  | 100%          |
| 4  |                                                                               |       |               |
| 5  | <b>Financial security at lockdown survey</b>                                  |       |               |
| 6  | Living comfortably                                                            | 354   | 20% (18%-22%) |
| 7  | Doing alright                                                                 | 766   | 42% (40%-45%) |
| 8  | Just about getting by                                                         | 462   | 26% (24%-28%) |
| 9  | Finding it quite/ very difficult                                              | 223   | 12% (11%-14%) |
| 10 | Missing                                                                       | 55    |               |
| 11 | Total                                                                         | 1860  | 100%          |
| 12 |                                                                               |       |               |
| 13 |                                                                               |       |               |
| 14 | <b>Change in financial status (compared to 3 months prior, as asked in</b>    |       |               |
| 15 | <b>lockdown survey)</b>                                                       |       |               |
| 16 | Better off                                                                    | 166   | 10% (8%-11%)  |
| 17 | About the same                                                                | 989   | 58% (55%-60%) |
| 18 | Worse off                                                                     | 562   | 33% (31%-35%) |
| 19 | Missing                                                                       | 143   |               |
| 20 | Total                                                                         | 1860  | 100%          |
| 21 |                                                                               |       |               |
| 22 | <b>Index of Multiple Deprivation 2019 Quintile</b>                            |       |               |
| 23 | 1: Most Deprived                                                              | 1,211 | 65% (63%-67%) |
| 24 | 2                                                                             | 390   | 21% (19%-23%) |
| 25 | 3                                                                             | 139   | 7% (6%-9%)    |
| 26 | 4                                                                             | 88    | 5% (4%-6%)    |
| 27 | 5: Least Deprived                                                             | 29    | 2% (1%-2%)    |
| 28 | Missing                                                                       | 3     |               |
| 29 | Total                                                                         | 1860  | 100%          |
| 30 |                                                                               |       |               |
| 31 |                                                                               |       |               |
| 32 | <b>Employment status of main earner</b>                                       |       |               |
| 33 | Employed - working from home                                                  | 393   | 22% (20%-24%) |
| 34 | Employed: going into work                                                     | 567   | 32% (30%-34%) |
| 35 | On furlough                                                                   | 271   | 15% (14%-17%) |
| 36 | Self-employed: working                                                        | 147   | 8% (7%-10%)   |
| 37 | Self-employed: not working                                                    | 200   | 11% (10%-13%) |
| 38 | Unemployed                                                                    | 208   | 12% (10%-13%) |
| 39 | Missing                                                                       | 74    |               |
| 40 | Total                                                                         | 1860  | 100%          |
| 41 |                                                                               |       |               |
| 42 |                                                                               |       |               |
| 43 | <b>Whether respondent is a keyworker</b>                                      |       |               |
| 44 | No                                                                            | 1,259 | 68% (66%-71%) |
| 45 | Yes                                                                           | 579   | 32% (29%-34%) |
| 46 | Missing                                                                       | 22    |               |
| 47 | Total                                                                         | 1860  | 100%          |
| 48 |                                                                               |       |               |
| 49 |                                                                               |       |               |
| 50 | <b>Whether anyone in household is clinically vulnerable to Covid-19</b>       |       |               |
| 51 | No                                                                            | 1,419 | 77% (75%-79%) |
| 52 | Yes                                                                           | 426   | 23% (21%-25%) |
| 53 | Missing                                                                       | 15    |               |
| 54 | Total                                                                         | 1860  | 100%          |
| 55 |                                                                               |       |               |
| 56 | <b>Whether anyone in household is currently/ has previously self-isolated</b> |       |               |
| 57 | No                                                                            | 1,331 | 72% (70%-74%) |
| 58 | Yes                                                                           | 508   | 28% (26%-30%) |
| 59 | Missing                                                                       | 21    |               |
| 60 | Total                                                                         | 1860  | 100%          |

**Number of children in household**

|              |      |               |
|--------------|------|---------------|
| One          | 387  | 21% (19%-23%) |
| Two          | 699  | 38% (35%-40%) |
| Three        | 451  | 24% (22%-26%) |
| Four or more | 323  | 17% (16%-19%) |
| Total        | 1860 | 100%          |

**Total household size**

|             |      |               |
|-------------|------|---------------|
| Two/ Three  | 321  | 17% (16%-19%) |
| Four/ Five  | 943  | 51% (49%-53%) |
| Six or more | 583  | 32% (29%-34%) |
| Missing     | 13   |               |
| Total       | 1860 | 100%          |

**Whether single parent**

|         |       |               |
|---------|-------|---------------|
| No      | 1,604 | 88% (86%-89%) |
| Yes     | 222   | 12% (11%-14%) |
| Missing | 34    |               |
| Total   | 1860  | 100%          |

**Quality of relationship with partner (for those married or in a relationship)**

|           |      |               |
|-----------|------|---------------|
| Excellent | 783  | 51% (48%-53%) |
| Good      | 598  | 39% (36%-41%) |
| Average   | 129  | 8% (7%-10%)   |
| Poor      | 23   | 1% (1%-2%)    |
| Very poor | 10   | 1% (0%-1%)    |
| Missing   | 61   |               |
| Total     | 1604 | 100%          |

**Loneliness: How often felt lonely in the past week**

|                                  |      |               |
|----------------------------------|------|---------------|
| None, or almost none of the time | 998  | 57% (55%-60%) |
| Some of the time                 | 555  | 32% (30%-34%) |
| Most of the time                 | 131  | 8% (6%-9%)    |
| All, or almost all of the time   | 56   | 3% (2%-4%)    |
| Missing                          | 120  |               |
| Total                            | 1860 | 100%          |

**Social support: how easy to get help from friends/ neighbours if needed**

|                |      |               |
|----------------|------|---------------|
| Very difficult | 101  | 6% (5%-7%)    |
| Difficult      | 146  | 8% (7%-9%)    |
| Possible       | 529  | 29% (27%-31%) |
| Easy           | 529  | 29% (27%-31%) |
| Very easy      | 513  | 28% (26%-30%) |
| Missing        | 42   |               |
| Total          | 1860 | 100%          |

**Food security: How often is it true that food does not last**

|           |       |               |
|-----------|-------|---------------|
| Never     | 1,379 | 79% (77%-81%) |
| Sometimes | 279   | 16% (14%-18%) |
| Often     | 91    | 5% (4%-6%)    |
| Missing   | 111   |               |
| Total     | 1860  | 100%          |

**Housing security: Whether worried about eviction/ repossession**

|                               |       |               |
|-------------------------------|-------|---------------|
| Strongly disagree or disagree | 1,250 | 71% (68%-73%) |
| Neither                       | 328   | 19% (17%-20%) |



|   |                       |      |               |
|---|-----------------------|------|---------------|
| 1 | Strongly agree/ agree | 194  | 11% (10%-12%) |
| 2 | Missing               | 88   |               |
| 3 | Total                 | 1860 | 100%          |

5 **Job security: Whether expect main earner to still have job in 12 months**  
6 **(excluding those currently unemployed)**

|    |            |      |               |
|----|------------|------|---------------|
| 7  | No         | 77   | 5% (4%-6%)    |
| 8  | Yes        | 979  | 61% (59%-64%) |
| 9  | Don't know | 537  | 34% (31%-36%) |
| 10 | Missing    | 59   |               |
| 11 | Total      | 1652 | 100%          |

13 **Housing conditions: Whether damp in house**

|    |         |       |               |
|----|---------|-------|---------------|
| 14 | No      | 1,307 | 71% (69%-73%) |
| 15 | Yes     | 534   | 29% (27%-31%) |
| 16 | Missing | 19    |               |
| 17 | Total   | 1860  | 100%          |

19 **Frequency of physical activity currently**

|    |                    |      |               |
|----|--------------------|------|---------------|
| 20 | Never              | 239  | 13% (12%-15%) |
| 21 | 1 or 2 days a week | 489  | 27% (25%-29%) |
| 22 | Most days          | 516  | 28% (26%-30%) |
| 23 | Every day          | 586  | 32% (30%-34%) |
| 24 | Missing            | 30   |               |
| 25 | Total              | 1860 | 100%          |

26 **Change in frequency of physical activity since lockdown**

|    |           |      |               |
|----|-----------|------|---------------|
| 27 | Less      | 766  | 48% (46%-51%) |
| 28 | About the | 408  | 26% (24%-28%) |
| 29 | More      | 419  | 26% (24%-29%) |
| 30 | Missing   | 267  |               |
| 31 | Total     | 1860 | 100%          |

32  
33  
34  
35  
36  
37  
38  
39  
40  
41  
42  
43  
44  
45  
46  
47  
48  
49  
50  
51  
52  
53  
54  
55  
56  
57  
58  
59  
60

**Table 2: Odds ratios (with 95% CI) from unadjusted logistic regression models for increase of 5 points or more between pre-Covid19 and Covid-19 lockdown survey**

| Covariate                                                                                | PHQ-8 increase $\geq 5$ |            |             | GAD-7 increase $\geq 5$ |            |             |
|------------------------------------------------------------------------------------------|-------------------------|------------|-------------|-------------------------|------------|-------------|
|                                                                                          | Odds Ratio              | Low 95% CI | High 95% CI | Odds Ratio              | Low 95% CI | High 95% CI |
| <b>Cohort Source (Reference: BiBGU)</b>                                                  |                         |            |             |                         |            |             |
| BiBBS                                                                                    | 0.84                    | 0.64       | 1.10        | 0.84                    | 0.63       | 1.12        |
| <b>Ethnicity (Reference: White British)</b>                                              |                         |            |             |                         |            |             |
| Pakistani heritage                                                                       | 0.88                    | 0.68       | 1.15        | 0.94                    | 0.72       | 1.23        |
| Other                                                                                    | 0.94                    | 0.67       | 1.32        | 0.85                    | 0.59       | 1.21        |
| <b>Age group (Reference: Under 30 years)</b>                                             |                         |            |             |                         |            |             |
| 30 to 34 years                                                                           | 1.01                    | 0.66       | 1.54        | 0.90                    | 0.57       | 1.42        |
| 35 to 39 years                                                                           | 0.89                    | 0.59       | 1.35        | 0.99                    | 0.64       | 1.53        |
| 40 to 44 years                                                                           | 1.04                    | 0.69       | 1.58        | 0.88                    | 0.57       | 1.38        |
| 45 years plus                                                                            | 0.92                    | 0.59       | 1.45        | 1.02                    | 0.64       | 1.63        |
| <b>Financial security at pre-Covid19 survey (Reference: Living comfortably)</b>          |                         |            |             |                         |            |             |
| Doing alright                                                                            | 1.07                    | 0.81       | 1.42        | 1.19                    | 0.89       | 1.59        |
| Just about getting by                                                                    | 1.72                    | 1.23       | 2.40        | 1.66                    | 1.17       | 2.35        |
| Finding it quite/ very difficult                                                         | 1.70                    | 1.03       | 2.80        | 2.39                    | 1.44       | 3.98        |
| <b>Financial security at lockdown survey (Reference: Living comfortably)</b>             |                         |            |             |                         |            |             |
| Doing alright                                                                            | 1.74                    | 1.18       | 2.56        | 1.47                    | 1.00       | 2.17        |
| Just about getting by                                                                    | 3.52                    | 2.36       | 5.26        | 3.20                    | 2.15       | 4.76        |
| Finding it quite/ very difficult                                                         | 6.23                    | 3.96       | 9.80        | 6.03                    | 3.82       | 9.51        |
| <b>Change in financial status compared to 3 months ago (Reference: Better off)</b>       |                         |            |             |                         |            |             |
| About the same                                                                           | 0.65                    | 0.43       | 0.98        | 0.88                    | 0.55       | 1.40        |
| Worse off                                                                                | 1.36                    | 0.89       | 2.01        | 1.99                    | 1.25       | 3.19        |
| <b>Index of Multiple Deprivation 2019 Quintile (Reference: 1 Most deprived quintile)</b> |                         |            |             |                         |            |             |
| 2                                                                                        | 0.90                    | 0.67       | 1.21        | 1.22                    | 0.92       | 1.63        |
| 3                                                                                        | 0.91                    | 0.58       | 1.41        | 0.87                    | 0.55       | 1.39        |
| 4                                                                                        | 0.76                    | 0.43       | 1.34        | 0.98                    | 0.57       | 1.68        |
| 5 Least deprived quintile                                                                | 0.85                    | 0.34       | 2.13        | 0.99                    | 0.39       | 2.48        |
| <b>Employment status of main earner (Reference: Employed and working from home)</b>      |                         |            |             |                         |            |             |
| Employed: going into work                                                                | 1.18                    | 0.84       | 1.65        | 1.20                    | 0.85       | 1.69        |
| On furlough                                                                              | 1.19                    | 0.79       | 1.79        | 1.29                    | 0.85       | 1.94        |
| Self-employed: working                                                                   | 0.90                    | 0.53       | 1.51        | 0.92                    | 0.55       | 1.57        |
| Self-employed: not working                                                               | 1.49                    | 0.97       | 2.27        | 1.31                    | 0.84       | 2.04        |
| Unemployed                                                                               | 2.03                    | 1.34       | 3.09        | 2.23                    | 1.44       | 3.44        |
| <b>Whether respondent is a keyworker (Reference: No)</b>                                 |                         |            |             |                         |            |             |

|    |                                                                                                 |      |      |       |      |      |       |
|----|-------------------------------------------------------------------------------------------------|------|------|-------|------|------|-------|
| 1  | Yes                                                                                             | 0.99 | 0.77 | 1.27  | 1.05 | 0.82 | 1.35  |
| 2  |                                                                                                 |      |      |       |      |      |       |
| 3  |                                                                                                 |      |      |       |      |      |       |
| 4  | <b>Whether anyone in household is clinically vulnerable to Covid-19 (Reference: No)</b>         |      |      |       |      |      |       |
| 5  | Yes                                                                                             | 1.68 | 1.29 | 2.19  | 1.53 | 1.17 | 2.01  |
| 6  |                                                                                                 |      |      |       |      |      |       |
| 7  | <b>Whether anyone in household is currently/ has previously self-isolated (Reference: No)</b>   |      |      |       |      |      |       |
| 8  |                                                                                                 |      |      |       |      |      |       |
| 9  | Yes                                                                                             | 1.59 | 1.24 | 2.04  | 1.48 | 1.14 | 1.92  |
| 10 |                                                                                                 |      |      |       |      |      |       |
| 11 |                                                                                                 |      |      |       |      |      |       |
| 12 | <b>Number of children in household (Reference: One)</b>                                         |      |      |       |      |      |       |
| 13 | Two                                                                                             | 1.20 | 0.87 | 1.67  | 1.05 | 0.76 | 1.45  |
| 14 | Three                                                                                           | 1.39 | 0.98 | 1.98  | 1.20 | 0.84 | 1.71  |
| 15 | Four or more                                                                                    | 1.12 | 0.76 | 1.65  | 0.93 | 0.62 | 1.39  |
| 16 |                                                                                                 |      |      |       |      |      |       |
| 17 |                                                                                                 |      |      |       |      |      |       |
| 18 | <b>Total household size (Reference: Less than four)</b>                                         |      |      |       |      |      |       |
| 19 | Four or Five                                                                                    | 0.73 | 0.53 | 0.99  | 0.95 | 0.69 | 1.32  |
| 20 | Six or more                                                                                     | 0.72 | 0.51 | 1.00  | 0.90 | 0.63 | 1.29  |
| 21 |                                                                                                 |      |      |       |      |      |       |
| 22 |                                                                                                 |      |      |       |      |      |       |
| 23 | <b>Whether single parent (Reference: No)</b>                                                    |      |      |       |      |      |       |
| 24 | Yes                                                                                             | 1.66 | 1.18 | 2.33  | 1.28 | 0.89 | 1.85  |
| 25 |                                                                                                 |      |      |       |      |      |       |
| 26 |                                                                                                 |      |      |       |      |      |       |
| 27 | <b>Quality of relationship with partner (Reference: Excellent)</b>                              |      |      |       |      |      |       |
| 28 | Good                                                                                            | 1.93 | 1.45 | 2.57  | 1.82 | 1.35 | 2.44  |
| 29 | Average to poor                                                                                 | 3.64 | 2.44 | 5.43  | 5.07 | 3.37 | 7.62  |
| 30 |                                                                                                 |      |      |       |      |      |       |
| 31 | <b>Loneliness (Reference: not lonely most/ all of the time)</b>                                 |      |      |       |      |      |       |
| 32 | Lonely most/ all of the time                                                                    | 8.37 | 5.70 | 12.27 | 8.50 | 5.71 | 12.65 |
| 33 |                                                                                                 |      |      |       |      |      |       |
| 34 |                                                                                                 |      |      |       |      |      |       |
| 35 |                                                                                                 |      |      |       |      |      |       |
| 36 | <b>Social support (Reference: Easy to get help from friends/ neighbours if needed)</b>          |      |      |       |      |      |       |
| 37 | Not easy to get help                                                                            | 2.25 | 1.78 | 2.86  | 2.13 | 1.67 | 2.73  |
| 38 |                                                                                                 |      |      |       |      |      |       |
| 39 |                                                                                                 |      |      |       |      |      |       |
| 40 | <b>Food security (Reference: Secure - Never or sometimes true that food does not last)</b>      |      |      |       |      |      |       |
| 41 | Insecure - Often true that food does not last                                                   | 3.33 | 2.09 | 5.28  | 3.46 | 2.15 | 5.58  |
| 42 |                                                                                                 |      |      |       |      |      |       |
| 43 |                                                                                                 |      |      |       |      |      |       |
| 44 | <b>Housing security (Reference: Secure - Not worried about eviction/ repossession)</b>          |      |      |       |      |      |       |
| 45 | Insecure - Worried about eviction/ repossession                                                 | 3.29 | 2.36 | 4.58  | 3.00 | 2.11 | 4.25  |
| 46 |                                                                                                 |      |      |       |      |      |       |
| 47 |                                                                                                 |      |      |       |      |      |       |
| 48 | <b>Job security: whether expect main earner to still have job in 12 months (Reference: Yes)</b> |      |      |       |      |      |       |
| 49 |                                                                                                 |      |      |       |      |      |       |
| 50 | No                                                                                              | 0.84 | 0.49 | 1.43  | 0.96 | 0.56 | 1.64  |
| 51 |                                                                                                 |      |      |       |      |      |       |
| 52 |                                                                                                 |      |      |       |      |      |       |
| 53 | <b>Housing conditions (Reference: No damp in house)</b>                                         |      |      |       |      |      |       |
| 54 | Damp in house                                                                                   | 1.85 | 1.45 | 2.38  | 1.57 | 1.21 | 2.03  |
| 55 |                                                                                                 |      |      |       |      |      |       |
| 56 |                                                                                                 |      |      |       |      |      |       |
| 57 | <b>Frequency of physical activity (Reference: Every day)</b>                                    |      |      |       |      |      |       |
| 58 | Most days                                                                                       | 1.58 | 1.15 | 2.18  | 1.67 | 1.21 | 2.31  |
| 59 | 1 or 2 days a week                                                                              | 1.93 | 1.40 | 2.67  | 1.67 | 1.20 | 2.31  |
| 60 | Never                                                                                           | 3.13 | 2.15 | 4.56  | 2.55 | 1.72 | 3.78  |

1  
2 **Change in frequency of physical activity since lockdown (Reference: More than**  
3 **before)**

4  
5 About the same 0.66 0.45 0.97 0.82 0.56 1.21  
6 Less than before 1.27 0.94 1.72 1.43 1.04 1.95  
7  
8  
9  
10  
11  
12  
13  
14  
15  
16  
17  
18  
19  
20  
21  
22  
23  
24  
25  
26  
27  
28  
29  
30  
31  
32  
33  
34  
35  
36  
37  
38  
39  
40  
41  
42  
43  
44  
45  
46  
47  
48  
49  
50  
51  
52  
53  
54  
55  
56  
57  
58  
59  
60

|                  |      |      |      |      |      |      |
|------------------|------|------|------|------|------|------|
| About the same   | 0.66 | 0.45 | 0.97 | 0.82 | 0.56 | 1.21 |
| Less than before | 1.27 | 0.94 | 1.72 | 1.43 | 1.04 | 1.95 |

For peer review only

**Table 3a: Odds ratios (with 95% CI) from univariate and multivariate logistic regression models for increase in PHQ-8 of 5 points or more between pre-Covid19 and Covid-19 lockdown survey**

**PHQ-8 increase  $\geq$  5**

| Covariate                                                                    | Univariate model |            |             | Multivariate model |            |             |
|------------------------------------------------------------------------------|------------------|------------|-------------|--------------------|------------|-------------|
|                                                                              | Odds Ratio       | Low 95% CI | High 95% CI | Odds Ratio         | Low 95% CI | High 95% CI |
| <b>Ethnicity (Reference: White British)</b>                                  |                  |            |             |                    |            |             |
| Pakistani heritage                                                           | 0.88             | 0.68       | 1.15        | 0.67               | 0.51       | 0.89        |
| Other                                                                        | 0.94             | 0.67       | 1.32        | 0.78               | 0.55       | 1.12        |
| <b>Financial security at lockdown survey (Reference: Living comfortably)</b> |                  |            |             |                    |            |             |
| Doing alright                                                                |                  |            |             | 1.90               | 1.27       | 2.84        |
| Just about getting by                                                        |                  |            |             | 3.92               | 2.58       | 5.97        |
| Finding it quite/ very difficult                                             |                  |            |             | 7.47               | 4.64       | 12.03       |

Models also controls for baseline PHQ-8 score

**Table 3b: Odds ratios (with 95% CI) from univariate and multivariate logistic regression models for increase in GAD-7 of 5 points or more between pre-Covid19 and Covid-19 lockdown survey**

**GAD-7 increase  $\geq$  5**

| Covariate                                                                    | Univariate model |            |             | Multivariate model |            |             |
|------------------------------------------------------------------------------|------------------|------------|-------------|--------------------|------------|-------------|
|                                                                              | Odds Ratio       | Low 95% CI | High 95% CI | Odds Ratio         | Low 95% CI | High 95% CI |
| <b>Ethnicity (Reference: White British)</b>                                  |                  |            |             |                    |            |             |
| Pakistani heritage                                                           | 0.94             | 0.72       | 1.23        | 0.73               | 0.55       | 0.97        |
| Other                                                                        | 0.85             | 0.59       | 1.21        | 0.74               | 0.51       | 1.08        |
| <b>Financial security at lockdown survey (Reference: Living comfortably)</b> |                  |            |             |                    |            |             |
| Doing alright                                                                |                  |            |             | 1.51               | 1.02       | 2.24        |
| Just about getting by                                                        |                  |            |             | 3.33               | 2.22       | 5.00        |
| Finding it quite/ very difficult                                             |                  |            |             | 6.62               | 4.13       | 10.61       |

Models also controls for baseline GAD-7 score

1  
2  
3  
4  
5  
6  
7  
8  
9  
10  
11  
12  
13  
14  
15  
16  
17  
18  
19  
20  
21  
22  
23  
24  
25  
26  
27  
28  
29  
30  
31  
32  
33  
34  
35  
36  
37  
38  
39  
40  
41  
42  
43  
44  
45  
46  
47  
48  
49  
50  
51  
52  
53  
54  
55  
56  
57  
58  
59  
60

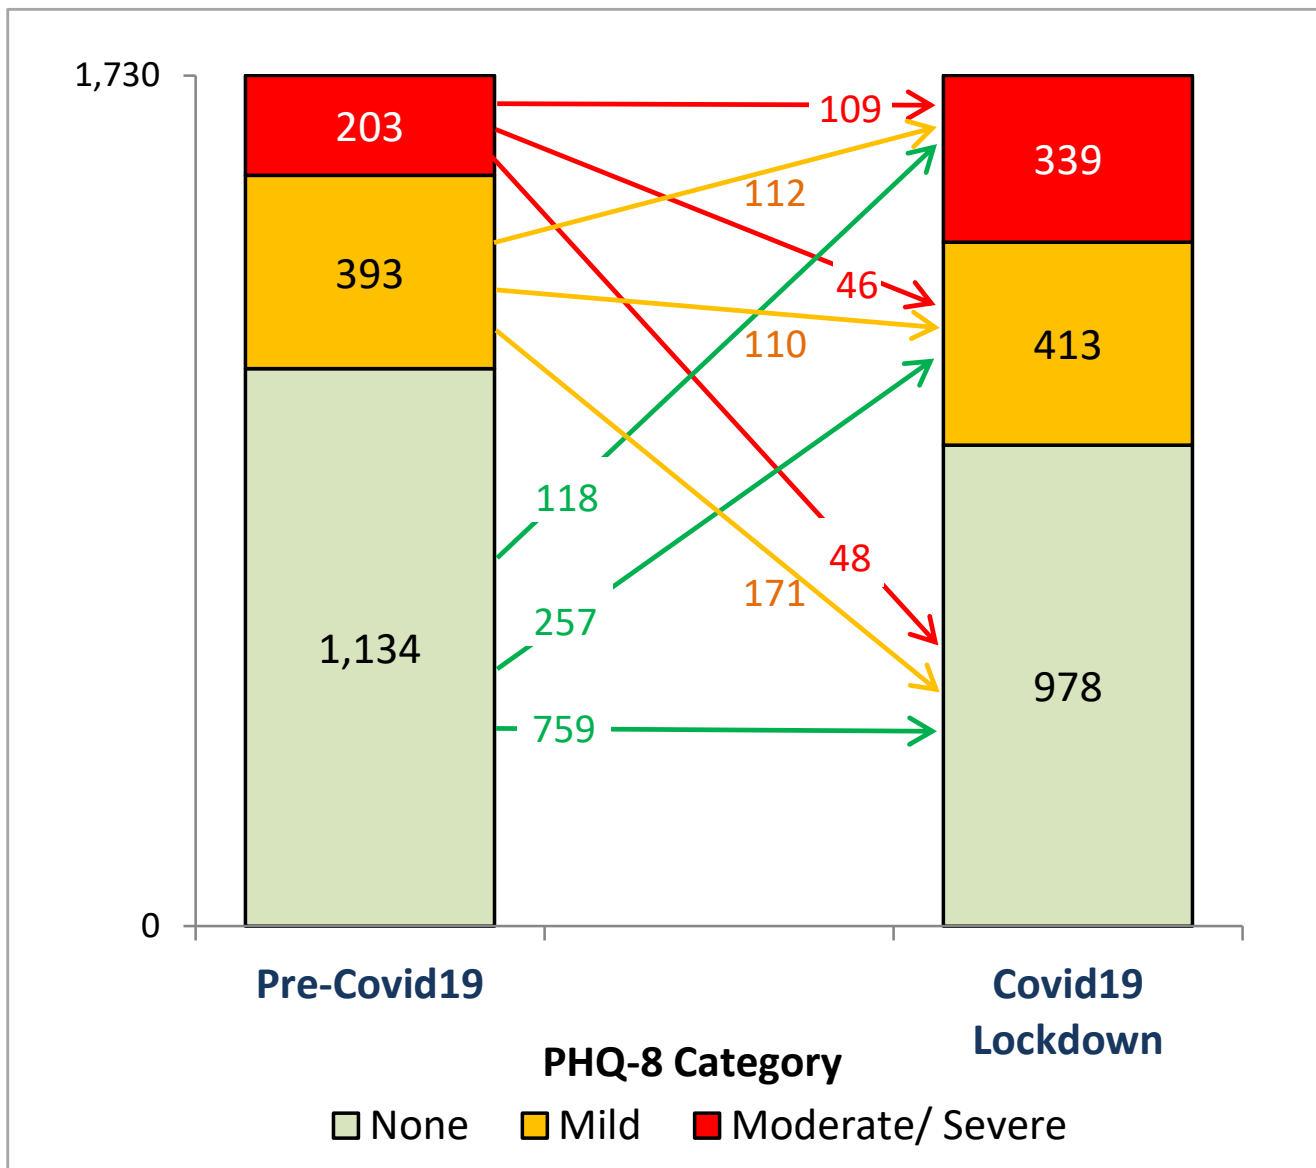



1  
2  
3  
4  
5  
6  
7  
8  
9  
10  
11  
12  
13  
14  
15  
16  
17  
18  
19  
20  
21  
22  
23  
24  
25  
26  
27  
28  
29  
30  
31  
32  
33  
34  
35  
36  
37  
38  
39  
40  
41  
42  
43  
44  
45  
46  
47  
48  
49  
50  
51  
52  
53  
54  
55  
56  
57  
58  
59  
60

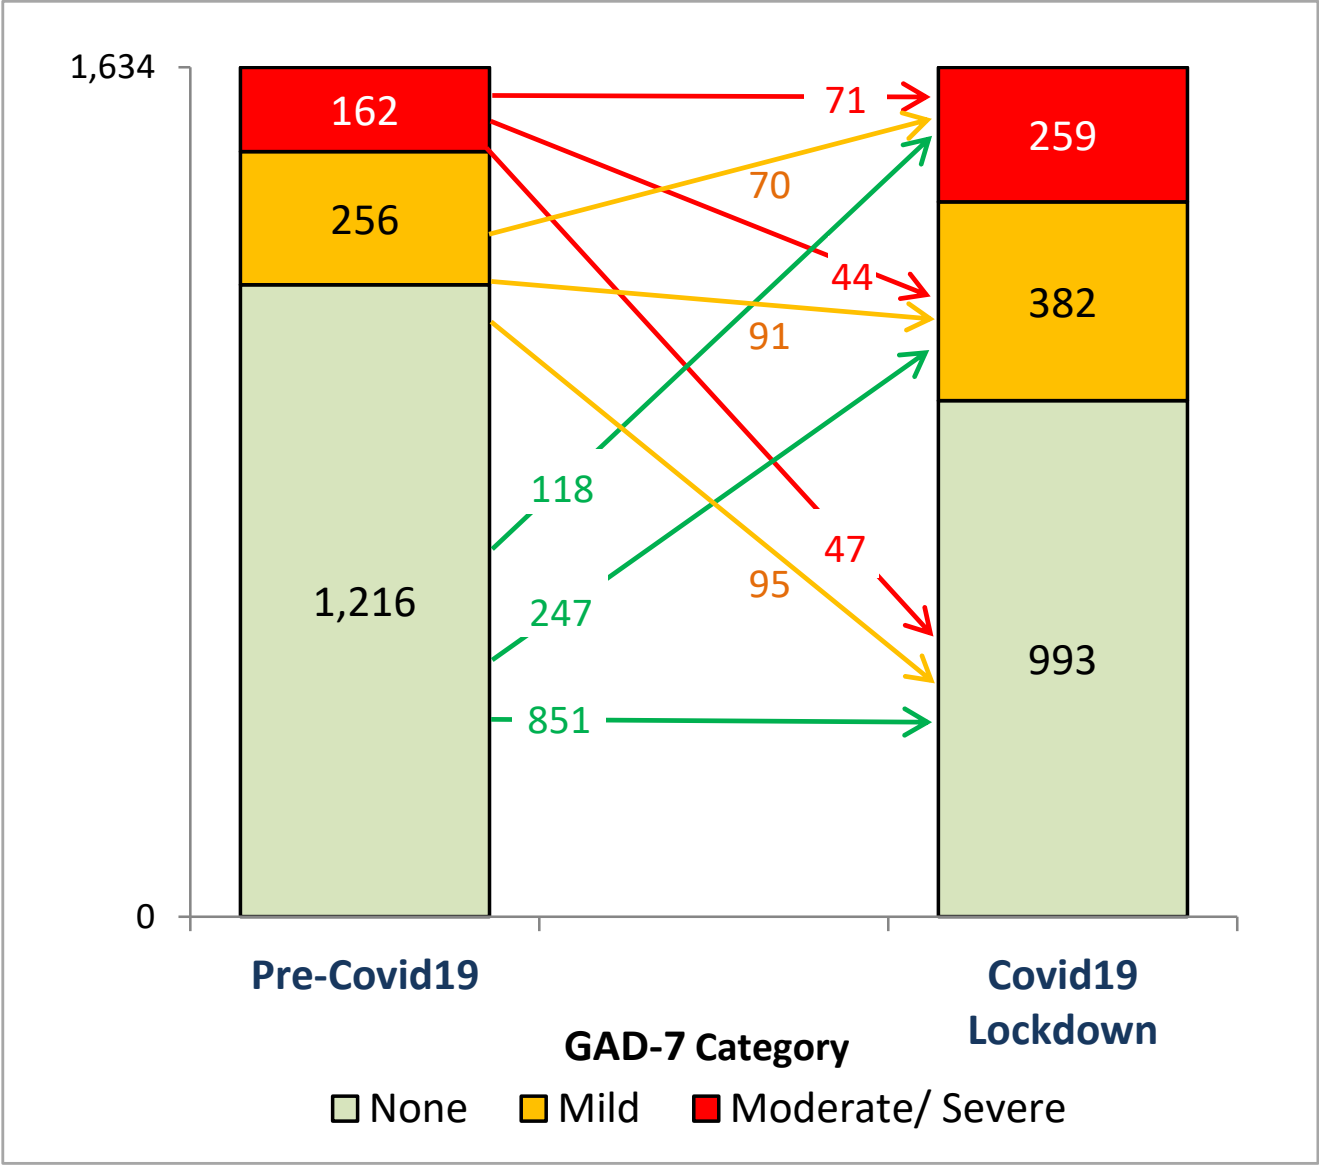

**Supplementary Tables S1 to S9: Multivariate models for increase in PHQ-8 and GAD-7 with ethnicity and covariates measuring food, housing and employment insecurity; loneliness; social support; quality of relationship with partner; self-isolating and vulnerable households; and physical activity.**

All models for change in PHQ-8 also control for baseline PHQ-8, and all models for change in GAD-7 also control for baseline GAD-7. None of these covariates led to significant differences in ethnicity, with the exception of physical activity: after controlling for levels of physical activity Pakistani heritage respondents were significantly less likely to experience an increase in PHQ-8 of 5 points or more.

| <b>Table S1: Ethnicity and Food Security</b>                                               | <b>PHQ-8</b>      |                 | <b>GAD-7</b>      |                 |
|--------------------------------------------------------------------------------------------|-------------------|-----------------|-------------------|-----------------|
|                                                                                            | <b>Odds Ratio</b> | <b>(95% CI)</b> | <b>Odds Ratio</b> | <b>(95% CI)</b> |
| <b>Ethnicity (Reference: White British)</b>                                                |                   |                 |                   |                 |
| Pakistani heritage                                                                         | 0.84              | (0.64-1.10)     | 0.89              | (0.68-1.17)     |
| Other                                                                                      | 0.87              | (0.61-1.25)     | 0.80              | (0.55-1.16)     |
| <b>Food security (Reference: Secure - Never or sometimes true that food does not last)</b> |                   |                 |                   |                 |
| Insecure - Often true that food does not last                                              | 3.48              | (2.18-5.54)     | 3.63              | (2.24-5.87)     |

| <b>Table S2: Ethnicity and Housing Security</b>                                        | <b>PHQ-8</b>      |                 | <b>GAD-7</b>      |                 |
|----------------------------------------------------------------------------------------|-------------------|-----------------|-------------------|-----------------|
|                                                                                        | <b>Odds Ratio</b> | <b>(95% CI)</b> | <b>Odds Ratio</b> | <b>(95% CI)</b> |
| <b>Ethnicity (Reference: White British)</b>                                            |                   |                 |                   |                 |
| Pakistani heritage                                                                     | 0.83              | (0.63-1.09)     | 0.87              | (0.66-1.14)     |
| Other                                                                                  | 0.75              | (0.53-1.08)     | 0.73              | (0.50-1.06)     |
| <b>Housing security (Reference: Secure - Not worried about eviction/ repossession)</b> |                   |                 |                   |                 |
| Insecure - Worried about eviction/ repossession                                        | 3.33              | (2.37-4.68)     | 3.04              | (2.13-4.35)     |

| <b>Table S3: Ethnicity and Job Security</b>                                                  | <b>PHQ-8</b>      |                 | <b>GAD-7</b>      |                 |
|----------------------------------------------------------------------------------------------|-------------------|-----------------|-------------------|-----------------|
|                                                                                              | <b>Odds Ratio</b> | <b>(95% CI)</b> | <b>Odds Ratio</b> | <b>(95% CI)</b> |
| <b>Ethnicity (Reference: White British)</b>                                                  |                   |                 |                   |                 |
| Pakistani heritage                                                                           | 0.88              | (0.63-1.23)     | 0.84              | (0.59-1.19)     |
| Other                                                                                        | 0.68              | (0.43-1.10)     | 0.72              | (0.44-1.18)     |
| <b>Job security: whether expect main earner to still have job in 12 mth (Reference: Yes)</b> |                   |                 |                   |                 |
| No                                                                                           | 0.88              | (0.52-1.51)     | 1.01              | (0.59-1.73)     |

| <b>Table S4: Ethnicity and Relationship Quality</b>                | <b>PHQ-8</b>      |                 | <b>GAD-7</b>      |                 |
|--------------------------------------------------------------------|-------------------|-----------------|-------------------|-----------------|
|                                                                    | <b>Odds Ratio</b> | <b>(95% CI)</b> | <b>Odds Ratio</b> | <b>(95% CI)</b> |
| <b>Ethnicity (Reference: White British)</b>                        |                   |                 |                   |                 |
| Pakistani heritage                                                 | 0.97              | (0.72-1.31)     | 0.91              | (0.67-1.23)     |
| Other                                                              | 1.10              | (0.75-1.63)     | 0.87              | (0.57-1.30)     |
| <b>Quality of relationship with partner (Reference: Excellent)</b> |                   |                 |                   |                 |
| Good                                                               | 1.84              | (1.38-2.46)     | 1.74              | (1.29-2.35)     |
| Average to very poor                                               | 3.65              | (2.44-5.46)     | 5.08              | (3.37-7.65)     |

1  
2  
3  
4  
5  
6  
7  
8  
9  
10  
11  
12  
13  
14

| Table S5: Ethnicity and Loneliness                              | PHQ-8      |              | GAD-7      |              |
|-----------------------------------------------------------------|------------|--------------|------------|--------------|
|                                                                 | Odds Ratio | (95% CI)     | Odds Ratio | (95% CI)     |
| <b>Ethnicity (Reference: White British)</b>                     |            |              |            |              |
| Pakistani heritage                                              | 0.86       | (0.65-1.14)  | 0.89       | (0.67-1.19)  |
| Other                                                           | 0.92       | (0.64-1.33)  | 0.83       | (0.56-1.21)  |
| <b>Loneliness (Reference: not lonely most/ all of the time)</b> |            |              |            |              |
| Lonely most/ all of the time                                    | 8.63       | (5.86-12.73) | 8.78       | (5.87-13.12) |

15  
16  
17  
18  
19  
20  
21  
22  
23  
24  
25

| Table S6: Ethnicity and Social Support                                                 | PHQ-8      |             | GAD-7      |             |
|----------------------------------------------------------------------------------------|------------|-------------|------------|-------------|
|                                                                                        | Odds Ratio | (95% CI)    | Odds Ratio | (95% CI)    |
| <b>Ethnicity (Reference: White British)</b>                                            |            |             |            |             |
| Pakistani heritage                                                                     | 0.85       | (0.65-1.11) | 0.90       | (0.69-1.18) |
| Other                                                                                  | 0.87       | (0.61-1.23) | 0.77       | (0.53-1.11) |
| <b>Social support (Reference: Easy to get help from friends/ neighbours if needed)</b> |            |             |            |             |
| Not Easy                                                                               | 2.33       | (1.82-2.97) | 2.21       | (1.72-2.83) |

26  
27  
28  
29  
30  
31  
32  
33  
34  
35  
36  
37  
38

| Table S7: Ethnicity and Physical Activity                    | PHQ-8      |             | GAD-7      |             |
|--------------------------------------------------------------|------------|-------------|------------|-------------|
|                                                              | Odds Ratio | (95% CI)    | Odds Ratio | (95% CI)    |
| <b>Ethnicity (Reference: White British)</b>                  |            |             |            |             |
| Pakistani heritage                                           | 0.73       | (0.56-0.96) | 0.81       | (0.61-1.07) |
| Other                                                        | 0.82       | (0.57-1.16) | 0.75       | (0.52-1.08) |
| <b>Frequency of physical activity (Reference: Every day)</b> |            |             |            |             |
| Never                                                        | 3.33       | (2.25-4.92) | 2.70       | (1.79-4.07) |
| 1 or 2 days a week                                           | 2.03       | (1.46-2.83) | 1.73       | (1.23-2.43) |
| Most days a week                                             | 1.54       | (1.11-2.15) | 1.70       | (1.22-2.36) |

39  
40  
41  
42  
43  
44  
45  
46  
47  
48

| Table S8: Ethnicity and Self-isolating                                                        | PHQ-8      |             | GAD-7      |             |
|-----------------------------------------------------------------------------------------------|------------|-------------|------------|-------------|
|                                                                                               | Odds Ratio | (95% CI)    | Odds Ratio | (95% CI)    |
| <b>Ethnicity (Reference: White British)</b>                                                   |            |             |            |             |
| Pakistani heritage                                                                            | 0.87       | (0.67-1.13) | 0.92       | (0.71-1.20) |
| Other                                                                                         | 0.91       | (0.65-1.29) | 0.83       | (0.57-1.19) |
| <b>Whether anyone in household is currently/ has previously self-isolated (Reference: No)</b> |            |             |            |             |
| Yes                                                                                           | 1.57       | (1.22-2.03) | 1.47       | (1.13-1.92) |

49  
50  
51  
52  
53  
54  
55  
56  
57  
58  
59  
60

| Table S9: Ethnicity and COVID19 Vulnerable Households                                   | PHQ-8      |             | GAD-7      |             |
|-----------------------------------------------------------------------------------------|------------|-------------|------------|-------------|
|                                                                                         | Odds Ratio | (95% CI)    | Odds Ratio | (95% CI)    |
| <b>Ethnicity (Reference: White British)</b>                                             |            |             |            |             |
| Pakistani heritage                                                                      | 0.81       | (0.62-1.06) | 0.88       | (0.68-1.16) |
| Other                                                                                   | 0.92       | (0.65-1.30) | 0.82       | (0.57-1.18) |
| <b>Whether anyone in household is clinically vulnerable to Covid-19 (Reference: No)</b> |            |             |            |             |
| Yes                                                                                     | 1.76       | (1.35-2.30) | 1.53       | (1.16-2.02) |

# BMJ Open

**“When will this end? Will it end?” The impact of the March-June 2020 UK Covid-19 lockdown response on mental health: a longitudinal survey of mothers in the Born in Bradford study.**

|                                 |                                                                                                                                                                                                                                                                                                                                                                                                                                                                                                                                                                                                                                                                                                                                                                                                                                                                                                                                                                                                                                                                                                                                                                                                                                                         |
|---------------------------------|---------------------------------------------------------------------------------------------------------------------------------------------------------------------------------------------------------------------------------------------------------------------------------------------------------------------------------------------------------------------------------------------------------------------------------------------------------------------------------------------------------------------------------------------------------------------------------------------------------------------------------------------------------------------------------------------------------------------------------------------------------------------------------------------------------------------------------------------------------------------------------------------------------------------------------------------------------------------------------------------------------------------------------------------------------------------------------------------------------------------------------------------------------------------------------------------------------------------------------------------------------|
| Journal:                        | <i>BMJ Open</i>                                                                                                                                                                                                                                                                                                                                                                                                                                                                                                                                                                                                                                                                                                                                                                                                                                                                                                                                                                                                                                                                                                                                                                                                                                         |
| Manuscript ID                   | bmjopen-2020-047748.R1                                                                                                                                                                                                                                                                                                                                                                                                                                                                                                                                                                                                                                                                                                                                                                                                                                                                                                                                                                                                                                                                                                                                                                                                                                  |
| Article Type:                   | Original research                                                                                                                                                                                                                                                                                                                                                                                                                                                                                                                                                                                                                                                                                                                                                                                                                                                                                                                                                                                                                                                                                                                                                                                                                                       |
| Date Submitted by the Author:   | 12-Jul-2021                                                                                                                                                                                                                                                                                                                                                                                                                                                                                                                                                                                                                                                                                                                                                                                                                                                                                                                                                                                                                                                                                                                                                                                                                                             |
| Complete List of Authors:       | Dickerson, Josie; Bradford Institute for Health Research<br>Kelly, Brian; Bradford Institute for Health Research<br>Lockyer, Bridget; Bradford Institute for Health Research<br>Bridges, Sally; Bradford Institute for Health Research<br>Cartwright, Christopher; Bradford Institute for Health Research<br>Willan, Kathryn ; Bradford Institute for Health Research<br>Shire, Katy; Bradford Institute for Health Research<br>Crossley, Kirsty; Bradford Institute for Health Research<br>Bryant, Maria; University of York, Health Sciences<br>Siddiqi, Najma; University of York, Health Sciences; Hull York Medical School<br>Sheldon, T; Bradford Institute for Health Research; Queen Mary University of London Barts and The London School of Medicine and Dentistry, Institute of Population Health Sciences<br>Lawlor, Deborah; University of Bristol, MRC Integrative Epidemiology Unit at The University of Bristol; University of Bristol Medical School, Population Health Science<br>Wright, John; Bradford Institute for Health Research<br>McEachan, Rosemary; Bradford Institute for Health Research, Bradford, United Kingdom; University of Bradford Faculty of Life Sciences<br>Pickett, Kate; University of York, Health Sciences |
| <b>Primary Subject Heading</b>: | Public health                                                                                                                                                                                                                                                                                                                                                                                                                                                                                                                                                                                                                                                                                                                                                                                                                                                                                                                                                                                                                                                                                                                                                                                                                                           |
| Secondary Subject Heading:      | Mental health, Public health                                                                                                                                                                                                                                                                                                                                                                                                                                                                                                                                                                                                                                                                                                                                                                                                                                                                                                                                                                                                                                                                                                                                                                                                                            |
| Keywords:                       | COVID-19, MENTAL HEALTH, Depression & mood disorders < PSYCHIATRY, Anxiety disorders < PSYCHIATRY, PUBLIC HEALTH                                                                                                                                                                                                                                                                                                                                                                                                                                                                                                                                                                                                                                                                                                                                                                                                                                                                                                                                                                                                                                                                                                                                        |
|                                 |                                                                                                                                                                                                                                                                                                                                                                                                                                                                                                                                                                                                                                                                                                                                                                                                                                                                                                                                                                                                                                                                                                                                                                                                                                                         |

SCHOLARONE™  
Manuscripts



I, the Submitting Author has the right to grant and does grant on behalf of all authors of the Work (as defined in the below author licence), an exclusive licence and/or a non-exclusive licence for contributions from authors who are: i) UK Crown employees; ii) where BMJ has agreed a CC-BY licence shall apply, and/or iii) in accordance with the terms applicable for US Federal Government officers or employees acting as part of their official duties; on a worldwide, perpetual, irrevocable, royalty-free basis to BMJ Publishing Group Ltd ("BMJ") its licensees and where the relevant Journal is co-owned by BMJ to the co-owners of the Journal, to publish the Work in this journal and any other BMJ products and to exploit all rights, as set out in our [licence](#).

The Submitting Author accepts and understands that any supply made under these terms is made by BMJ to the Submitting Author unless you are acting as an employee on behalf of your employer or a postgraduate student of an affiliated institution which is paying any applicable article publishing charge ("APC") for Open Access articles. Where the Submitting Author wishes to make the Work available on an Open Access basis (and intends to pay the relevant APC), the terms of reuse of such Open Access shall be governed by a Creative Commons licence – details of these licences and which [Creative Commons](#) licence will apply to this Work are set out in our licence referred to above.

Other than as permitted in any relevant BMJ Author's Self Archiving Policies, I confirm this Work has not been accepted for publication elsewhere, is not being considered for publication elsewhere and does not duplicate material already published. I confirm all authors consent to publication of this Work and authorise the granting of this licence.

1 **“When will this end? Will it end?” The impact of the March-June 2020 UK Covid-19 lockdown**  
2 **response on mental health: a longitudinal survey of mothers in the Born in Bradford study.**  
3  
4

5 Josie Dickerson<sup>1</sup>, Brian Kelly<sup>1</sup>, Bridget Lockyer<sup>1</sup>, Sally Bridges<sup>1</sup>, Christopher Cartwright<sup>1</sup>, Kathryn Willan<sup>1</sup>,  
6 Katy Shire<sup>1</sup>, Kirsty Crossley<sup>1</sup>, Maria Bryant<sup>1,2</sup>, Najma Siddiqi<sup>3</sup>, Trevor A Sheldon<sup>1,4</sup>, Deborah A Lawlor<sup>5,6,7</sup>,  
7 John Wright<sup>1</sup>, Rosemary RC McEachan<sup>1,8</sup>, Kate E Pickett<sup>1,2</sup> on behalf of the Bradford Institute for Health  
8 Research Covid-19 Scientific Advisory Group (<https://www.bradfordresearch.nhs.uk/c-sag/>).  
9

10  
11  
12 Corresponding author:

13 Josie Dickerson, Bradford Institute for Health Research, Bradford Teaching Hospitals NHS Foundation  
14 Trust, Bradford Royal Infirmary, Duckworth Lane, Bradford, BD9 6RJ, UK.

15 Email: [josie.dickerson@bthft.nhs.uk](mailto:josie.dickerson@bthft.nhs.uk)

16 Telephone: 01274 383916  
17  
18  
19

20  
21 **Addresses**

22 <sup>1</sup> Bradford Institute for Health Research, Bradford Teaching Hospitals NHS Foundation Trust, Bradford  
23 Royal Infirmary, Duckworth Lane, Bradford, UK.

24 <sup>2</sup> Department of Health Sciences, University of York, Department of Health Sciences, Seebohm Rowntree  
25 Building, University of York, Heslington, York, UK.

26 <sup>3</sup> The Hull York Medical School, University of York, Heslington York, UK

27 <sup>4</sup> Institute of Population Health Sciences, Barts and The London School of Medicine and Dentistry, Queen  
28 Mary University London, Yvonne Carter Building, 58 Turner Street, London, UK

29 <sup>5</sup> MRC Integrative Epidemiology Unit at the University of Bristol, Oakfield House, Oakfield Grove, Bristol, ,  
30 UK

31 <sup>6</sup> Population Health Science, Bristol Medical School, University of Bristol, UK

32 <sup>7</sup> Bristol National Institute for Health Research Biomedical Research Centre, UK

33 <sup>8</sup> Faculty of Life Sciences and Health Studies, University of Bradford, Richmond Rd, Bradford, UK  
34  
35  
36  
37  
38

39 **KEYWORDS**

40 Covid-19; mental health; depression; anxiety; health inequalities; ethnic minorities  
41  
42

43 **WORD COUNT:** 5,506  
44  
45  
46  
47  
48  
49  
50  
51  
52  
53  
54  
55  
56  
57  
58  
59  
60



## ABSTRACT

**Objectives** To explore clinically important increases in depression/anxiety from before to during the first UK Covid-19 lockdown and factors related to this change, with a particular focus on ethnic differences.

**Design** Pre-Covid and lockdown surveys nested within two longitudinal Born in Bradford cohort studies.

**Participants** 1,860 mothers with a child aged 0-4 or 9-13, 47% Pakistani heritage

**Main outcome measures** Odds ratios (OR) for a clinically important increase (5 points or more) in depression (PHQ-8) and anxiety (GAD-7) in unadjusted regression analyses, repeated with exposures of interest separated by ethnicity to look for differences in magnitude of associations, and lived experience of mothers captured in open text questions.

**Results** The number of women reporting clinically important depression/anxiety increased from 11% to 19% and 10% to 16% respectively from before to during the first Covid-19 lockdown. Increases in depression/anxiety were associated with loneliness (OR: 8.37, 95% CIs: 5.70-12.27; 8.50, 5.71-12.65 respectively), financial insecurity (6.23, 3.96-9.80; 6.03, 3.82-9.51). Food and housing insecurity, a lack of physical activity and a poor partner relationship were also associated.

Pakistani heritage mothers who were lonely or had a poor partner relationship had greater odds of worsening mental ill health compared to White British mothers with these exposures. White British mothers who were financially insecure or physically inactive had greater odds of worsening mental ill health than Pakistani mothers. Responses to open text questions illustrated this complex inter-play of challenges contributing to mental ill health.

**Conclusions** Mental ill health has worsened for many during the Covid-19 lockdown, particularly in those who are lonely and economically insecure. The magnitude of associations between key exposures and worsening mental health varied between ethnic groups. Mental health problems may have longer term consequences for public health and interventions that address the potential causes are needed.

## STRENGTHS AND LIMITATIONS OF THIS STUDY

- Two key longitudinal studies have highlighted that the Covid-19 pandemic and lockdowns have had a negative impact on mental health, particular in younger adults, women and those from low socio-economic circumstances, but with participants of predominantly White European ethnicity.
- Mental ill health is often reported to be more prevalent in people from ethnic minorities and the socially and economically disadvantaged. The Born in Bradford research programme offers a unique opportunity to investigate the impact of Covid-19 lockdown on mental health in a deprived and ethnically diverse population.
- This is a longitudinal study containing linked data collected before the Covid-19 pandemic and during the March-June 2020 lockdown which has allowed us to explore change over that time period in a highly ethnically diverse population, the majority of whom live in the most deprived centiles in the UK.
- Respondents in this study were mothers of children aged 0-5 and/or 9-13 which may limit the wider generalisability, though our findings are broadly similar (in prevalence and associations) to those from another longitudinal study that included adult men and women.
- We are not aware of other studies that have explored longitudinal change in mental health from pre- to during- the Covid-19 lock down in a similar ethnically diverse deprived population.

## Introduction

There is growing concern that the 'lockdown' measures to control the spread of the Covid-19 pandemic<sup>1,2</sup> have had unintended consequences including an increase in mental ill health. Several studies since the Covid-19 pandemic began have reported high levels of depression and anxiety<sup>3-7</sup> in the UK. However, the majority of these surveys are either cross-sectional or longitudinal *within* the lockdown period<sup>5-7</sup> with only two studies<sup>3,4</sup> comparing mental health in the pre-Covid-19 period to mental health during the Covid-19 lockdown. One of those used Office of National Statistics data and found worsening mental health in younger adults, those who were financially insecure, and those who had a disability<sup>3</sup>. The second, using data from two prospective cohorts, found worsening mental health during, compared to before, the lockdown in: younger adults, women, those with pre-existing mental and physical health conditions, those living alone and in socio-economic adversity<sup>4</sup>. In these two studies, most participants were of white European origin and the larger of the two studies was in a relatively affluent population. Mental ill health is often reported as being more prevalent in people from ethnic minorities and the socially and economically disadvantaged<sup>8,9</sup>, but no longitudinal research to date has investigated the impact of Covid-19 lockdown on mental health in these populations<sup>10</sup>.

We were able to explore these questions in depth by building on the Born in Bradford research programme which includes two longitudinal birth cohorts of ethnically diverse families living in the city of Bradford, many in deprived circumstances. These cohorts have recent in-depth information on the demographics, socioeconomic status and mental health of mothers before the Covid-19 pandemic,<sup>11-13</sup> as well as mental health during the March-June 2020 Covid-19 lockdown<sup>14</sup>, and so offer a unique opportunity to assess the impact of Covid-19 and lockdown longitudinally in a deprived and ethnically diverse population.

We used the data to:

- Describe the changes in the prevalence of depression and anxiety in mothers living in Bradford from before the Covid-19 pandemic to during the March-June 2020 Covid-19 lockdown.
  - Identify variables associated with a clinically important increase in mental ill health in this population, to identify vulnerable groups that may need additional support in the recovery from the pandemic.
  - Explore whether there is a difference in the magnitude of the associations of key exposures with an increase in clinically important mental ill health by ethnicity (Pakistani heritage compared to White British ethnicity).
  - To explore mothers' lived experience during the March-June 2020 Covid-19 lockdown by assessing the frequency of worries and concerns relating to mental ill health obtained through free text responses to open questions.

## Methods

### *Study Design*

A longitudinal study using data collected at two time points, before and during the March-June 2020 Covid-19 lockdown, from mothers who participated in one of two prospective birth cohort studies in Bradford: Born in Bradford's Growing Up (BiBGU) study, with parents of children currently aged 9-13<sup>11,12</sup> and Born in Bradford's Better Start (BiBBS), with parents of children currently aged 0-4.<sup>13</sup>

### *Patient and Public Involvement*

Born in Bradford is a 'people powered' research study; the local community were consulted to identify key research priorities during the March-June 2020 Covid-19 lockdown. This included consultation with key community groups, seldom-heard communities and local policy and decision makers to ensure that the focus of the research was relevant to local needs. The Covid-19 survey and recruitment approach were tested through our established research advisory groups. The findings of the study were also shared with these groups to enhance interpretation and ensure useful dissemination back to the community<sup>14</sup>.

### *Consent*

1 Participants had previously consented for their research data, and routinely collected health and education  
2 data, to be used for research. For the Covid-19 survey, verbal consent was taken for questionnaires  
3 completed over the phone and implied consent was assumed for all questionnaires completed via post or  
4 online.  
5

### 6 *Data Collection*

9 Full details of the data collection of the March-June 2020 Covid-19 survey can be found elsewhere<sup>14,15</sup>. In  
10 summary:

11 Participants were recruited using a combination of emails, text and phone with a follow-up postal survey,  
12 and in their main language wherever possible.

#### 14 *a) Pre-Covid-19 data*

16 Pre-Covid-19 data for BiBGU participants were derived from two sources: a) participant ethnicity and age  
17 were collected during pregnancy (2007-2011);<sup>11</sup> b) recent follow-up data on mental health (collected  
18 between 24<sup>th</sup> June 2017 and 12<sup>th</sup> March 2020).<sup>12</sup> Pre-Covid data for BiBBS participants were taken from  
19 data collected during pregnancy (6<sup>th</sup> January 2016 and 8<sup>th</sup> February 2020).<sup>13</sup> The median time since most  
20 recent pre-Covid data collection was 15 months (range 1 to 35) for BiBGU and 29 months (range 2 to 52)  
21 for BiBBS.  
22

#### 24 *b) March-June 2020 Covid-19 lockdown data collection:*

26 Mental health was measured using the PHQ-8<sup>16</sup> for depression and the GAD-7 for anxiety.<sup>17</sup> These are  
27 widely used measures of the severity of symptoms of depression and anxiety that have been validated in  
28 the general population,<sup>16,17</sup> and in many ethnic minorities including UK residents of Pakistani heritage.<sup>18</sup>  
29 Information was also collected on: household circumstances; family relationships; social support and  
30 loneliness; financial, employment, housing and food insecurity; physical health. This contextual information  
31 was captured in self-reported questions administered in the Covid-19 lockdown survey; details of variables  
32 used are in Table 1 and our protocol paper<sup>14</sup>. Information on the participants' lived experience during  
33 lockdown were captured using free text questions that asked "what are your three biggest worries at the  
34 moment?"; and "has anything been easier or more enjoyable in lockdown?"  
35

### 37 *Data Preparation*

39 To describe the changes in prevalence of depression and anxiety from before the Covid-19 pandemic to  
40 during the Covid-19 lockdown we derived a categorical variable for each PHQ-8 and GAD-7 score based  
41 on the standard clinical scoring classification: 0 to 4 no depression, 5 to 9 mild depression, 10-24  
42 moderate-severe depression; 0 to 4 no anxiety, 5 to 9 mild anxiety, 10 to 21 moderate-severe anxiety.<sup>16,17</sup>  
43 and then collapsed moderate, moderately severe and severe categories to indicate clinically important  
44 symptoms of depression and anxiety. To identify variables associated with an increase of mental ill health  
45 we used an increase in PHQ-8 and GAD-7 scores of 5 or more points as an indicator of clinically important  
46 change in symptoms. This cut-off was chosen following guidance from previous research and consultation  
47 with clinical colleagues<sup>19</sup>. An increase of five points or more would also always result in a change in the  
48 categorisation of symptoms (e.g. from none to mild or mild to moderate/severe) whilst also capturing  
49 changes in severity within the moderate/severe categories.  
50

51 Ethnicity was coded using Census 2011 categories and also as 'White British', 'Pakistani Heritage' and  
52 'Other', which included all other groups due to small numbers of a wide range of ethnicities. Given the  
53 heterogeneity of the 'Other' ethnic group, the decision was made to not use this group in these analyses,  
54 but to focus on comparing those of Pakistani heritage and White British ethnicity.  
55

56 A number of categories within other explanatory variables were collapsed for analysis. These included:  
57 Quality of relationship with partner: Average to poor (comprising of 'average', 'poor' and 'very poor');  
58 Loneliness: Not lonely (comprising of: 'none or almost none of the time' and 'some of the time') and Lonely  
59 (comprising of: 'Most of the time' and 'All or almost all of the time'); Social support: Easy to get support  
60 (comprising of: 'Very easy' and 'easy'); and Not easy to get support (comprising of: 'Very difficult', 'Difficult'

and 'Possible'); Food insecurity: Secure (Comprising of 'never true' or 'sometimes true' that food didn't last) and Insecure (Comprising of 'Often true' that food didn't last). Housing security: Secure (Comprising: 'Strongly Disagree', 'Disagree' and 'Neither disagree or agree' that I worry about being evicted or having my home repossessed) and Insecure (comprising of 'Strongly Agree' or 'Agree').

Missing data on measures was small for most variables (Table 1) and was not adjusted for in the analyses.

### *Data analysis*

To describe the changes in the prevalence of depression and anxiety from before to during the pandemic we explored the changes in PHQ-8 and GAD-7 categories using descriptive statistics and presented these visually using flow diagrams to elucidate the patterns of both positive and negative changes.

We used descriptive statistics to present results of sample characteristics, including depression and anxiety at pre-Covid-19 and Covid-19 lockdown survey time points.

We then modelled the odds ratios associated with an increase in PHQ-8 and GAD-7 scores by five or more points using separate unadjusted logistic regression models for each exposure variable of interest. Exposure variables included in the analyses were identified as indicative of an increase in mental ill-health in the lockdown survey findings reported previously.<sup>15</sup> Pre-Covid-19 PHQ-8 and GAD-7 scores were controlled for in each model.

In order to explore whether or not the magnitude of the association between exposure variables and a clinically important increase in symptoms of depression and anxiety differed between ethnic groups, we repeated the above analyses for Pakistani heritage and White British participants separately. This approach avoids the difficulties inherent in interpreting the ethnicity coefficient in regression models controlling for other variables<sup>20</sup>. All statistical analyses were carried out using Stata 15.<sup>21</sup>

To explore mothers' lived experience during the March-June 2020 Covid-19 lockdown, the free text responses to open questions were reviewed and themes that related to mental health of the mothers were pulled out. Responses were coded using thematic analysis.<sup>22</sup> The first 100 responses were analysed by one researcher (BL), employing an inductive approach where coding and theme development were driven by the content of the responses. Two codebooks were developed, one for the questions on the three biggest worries and recent challenges during lockdown and another smaller codebook for the question on what had been made more enjoyable and easier during lockdown. Using Microsoft Excel, the remaining responses were then coded by three different researchers in order to test the strength and validity of the codebooks. Through frequent discussion between the researchers about this process, adjustments were made to the original codebooks so that they were reflective of the total responses. The emergent themes relating to mental health were used to illuminate the findings from the quantitative analyses.

### *Ethics*

This study was approved by the HRA and Bradford/Leeds research ethics committee (Substantial amendments to: BiBGU 16/YH/0320 and BiBBS 15/YH/0455)

## **Results**

### *Study Population*

2,144 (28%) of those invited participated in the Covid-19 survey between 10<sup>th</sup> April and 30<sup>th</sup> June 2020. Full details of the study population are described elsewhere<sup>15</sup>, in summary: Participants were broadly representative of the invited cohort: 47% were of Pakistani heritage, 35% White British and 18% other ethnic groups; 46% lived in the most deprived decile of material deprivation in England. Baseline (i.e. prior to the Covid-19 pandemic) levels of depression and anxiety in participants and non-participants were also similar (see Supplementary Table 1).

Of the 2,144 mothers who responded to the survey, 1,860 (87%) had complete surveys and linked data from pre-Covid19 surveys. Of these; 1,316 (71%) were in the BiBGU cohort (with a child aged 9-13) and



544 (29%) were in the BiBBS cohort (with a child aged 0-4). Respondents were representative of the BiB and BiBBS cohorts (see Supplementary Table 1).<sup>15</sup> The mothers had a mean age of 37.5 years (SD 6.8). 877 (48%) were of Pakistani heritage, 613 (34%) of White British ethnicity and 320 (18%) of other ethnicities. Table 1 describes the sample characteristics of the study population.

[Table 1 here]

### *Study Sample Change in Prevalence of Depression and Anxiety*

The prevalence of moderate / severe depression increased between the pre-Covid-19 and Covid-19 lockdown surveys from 11% (n=212) to 19% (n=349). The proportion of mothers reporting mild symptoms of depression remained similar; while the proportion of those with no depressive symptoms decreased from 65% (n=1187) to 56% (n=1001), (Table 2). The proportion of mothers with moderate/severe anxiety increased from 10% (n=167) to 16% (n=289). The prevalence of mild anxiety also increased from 16% (n=270) to 23% (n=408), whilst the proportion of participants with no anxiety fell from 75% (n=1280) to 61% (n=1075) (see Table 2).

[Table 2 here]

### *Within-Mothers Change in Depression and Anxiety*

1,760 participants had both pre-Covid19 and Covid-19 lockdown depression data and 1634 had pre-Covid19 and Covid-19 lockdown anxiety data. For these mothers, Figures 1 and 2 show the flow of individuals from different categories of depression and anxiety across the two time points (pre-pandemic and during lockdown).

The majority of mothers stayed in the same depression and anxiety categories across the two time points, for example 67% (n=759) who had no symptoms in the pre-Covid-19 data continued to have no symptoms during lockdown; and 54% (n=109) of those who had moderate/severe symptoms before the pandemic, remained in this category in the lockdown survey). However, many mothers' mental health worsened, with 38% (n=230) who had no/mild symptoms pre-Covid-19 reporting moderate/severe symptoms in the lockdown survey. A smaller number of mothers' mental health improved: of those mothers with moderate/severe symptoms pre-Covid-19, 24% (n=48) subsequently reported no symptoms and 23% (n=46) reported mild depression in the Covid-19 survey. Similar patterns of change were seen with the anxiety categories (see also Supplementary Table 2).

[Figure 1 & 2 here]

367 (21%) of mothers reported a clinically important increase (5 or more points) in depressive symptoms, and 348 (21%) reported a clinically important increase (5 or more points) in anxiety symptoms. Table 3 presents the odds ratios for a clinically important increase in PHQ-8 and GAD-7 scores in relation to each exposure variable from the unadjusted logistic regression models. The estimates resulting from these models are imprecise, with wide confidence intervals.

Compared to White British mothers, the odds of an increase in clinically important depression was reduced by 12% in Pakistani women (Odds Ratio (OR) 0.88 [95% Confidence Intervals: 0.68-1.15]), but there was no clear association for anxiety (OR 0.94: [0.72-1.23]). Financial, food and housing insecurity during lockdown were associated with a higher likelihood of a clinically important increase in both depression and anxiety symptoms: the odds were more than 6 times greater for women who were financially insecure (OR 6.23 [3.96-9.8] for depression; OR 6.03 [3.82-9.51] for anxiety) and over 3 times greater in mothers who were food insecure (OR 3.33 [2.09-5.28] for depression; OR 3.46 [2.15-5.58] for anxiety) or housing insecure (OR 3.29 [2.36-4.58] for depression; OR 3.0 [2.11-4.25] for anxiety).

Social circumstances were also associated with an increase in depression and anxiety: The odds of increased depression or anxiety were more than eight times greater in mothers reporting loneliness (OR 8.37 [5.7-12.27] for depression; OR 8.5 [5.71-12.65] for anxiety), and a lack of social support doubled the likelihood of an increase in depression and anxiety (OR 2.25 [1.78-2.86]; OR 2.13 [1.67-2.73] respectively).

1 An average / poor relationship increased the odds of experiencing symptoms of depression by 3.6 [2.44-  
2 5.43] and of anxiety by 5.1 [3.37-7.62]. A larger household size reduced the OR for depressive symptoms  
3 (OR 0.73 [0.53-0.99]), but less so for anxiety (OR 0.90 [0.63-1.29]).  
4

5 A lack of physical activity during lockdown was associated with an increased OR for both depression and  
6 anxiety (OR 3.13 [2.15-4.56]; OR 2.55 [1.72-3.78], respectively). Mothers who did the same amount of  
7 physical activity during lockdown as they had done pre-Covid-19 reduced the odds of an increase in  
8 depressive symptoms by 34% (OR 0.66 [0.45-0.97]).  
9

10 Compared to mothers in the BiBGU cohort, the odds of an increase in depression or anxiety was reduced  
11 by 16% for mothers in the BiBBS cohort. Cohort differences included a) pregnancy status at pre-pandemic  
12 data collection (BiBBS=pregnant; BiBGU= primary school aged child); and b) child age at Covid-19 data  
13 collection (BiBBS=pre-school; BiBGU=primary/secondary).  
14

15  
16 [Table 3 here]  
17

18 When the unadjusted regression analysis was repeated separately for White British and Pakistani heritage  
19 mothers, interesting differences in the magnitude of the association between exposure variables and a  
20 clinically important increase in symptoms of depression and anxiety was found (Table 4a and 4b). The odds  
21 of an increase in depression and anxiety were greater for Pakistani heritage women who reported  
22 loneliness (OR 11.22 [6.45-19.53] for depression and OR 11.27 [6.16-20.56] for anxiety) compared to  
23 White British mothers (OR 7.17 [3.66-14.01] and OR 5.90 [3.03-11.47] respectively). There was also a  
24 greater magnitude of association for increased depression, but not anxiety, for Pakistani heritage women  
25 who reported an average / poor relationship with their partner (OR 4.91 [2.78-8.67] for depression and OR  
26 4.99 [2.72-9.14] for anxiety), compared to White British mothers (OR 2.61 [1.31-5.20] and OR 4.39 [2.26-  
27 8.53] respectively).  
28

29 In contrast the magnitude of the odds of an increase in depression and anxiety was greater for White British  
30 women who reported financial insecurity (OR 12.14 [5.15-28.60] for depression and OR 7.69 [3.43-17.26]  
31 for anxiety) or never doing physical activity (OR 5.54 [2.69-11.43] and OR 3.90 [1.82-8.36] respectively)  
32 compared to Pakistani heritage women (financial insecurity: OR 5.79 [2.90-11.56] for depression and OR  
33 4.35 [2.27-8.30] for anxiety); (physical activity: OR 3.34 [1.88-5.92] and OR 2.50 [1.40-4.45] respectively).  
34  
35

36 For Pakistani heritage mothers living in large households, the odds of an increase in depression (OR 0.54  
37 [0.31-0.94]) and anxiety (OR 0.61 [0.34-1.07]) was much reduced compared to White British mothers (OR  
38 0.91 [0.47-1.73] for depression and OR 1.13 [0.58-2.20] for anxiety).  
39

40 [Table 4 here]  
41

42 Free text responses to the question “what are your three biggest worries at the moment” were available for  
43 1799 mothers. Only a small proportion of women identified their mental health issues as one of their  
44 biggest worries, n=105 (6%, 95%CI: 5%-7%), slightly greater in White British mothers, n=51 (8%, 95%CI:  
45 6%-11%) than in mothers of Pakistani heritage, n=32 (4%, 95%CI: 3%-5%). More often, mothers reported  
46 how wider issues and concerns impacted on their mental health and wellbeing:  
47

48 **Health anxieties about Covid-19:** the most commonly reported worry was a fear of bringing the virus  
49 home (e.g. from the shops or from their places of work), and themselves or members of their family  
50 becoming ill or dying, as well as the fear of what would happen to their children if this did happen to them.  
51

52 *I worry about contracting coronavirus particularly whilst at work and either becoming critically myself unwell  
53 or bringing it home to my family*

54 *Feeling anxious about the virus and constantly worrying about my kids which 2 of them have health issues  
55 and are quite vulnerable*

56 *I feel particularly anxious to even step out of the house even for food shopping or taking a walk/exercise*

57 *I worry how this will affect my children. I'm terrified they will be separated as I have 2 children with my ex-  
58 husband and one with my current. So I haven't been outside in 10 weeks.*  
59  
60

1 **Mental load:** mothers often reported the mental load of managing work, home-schooling, childcare and  
2 domestic tasks, without the break provided by children attending school, nursery or other childcare. Being  
3 or feeling stuck inside and unable to move around freely contributed to a sense of suffocation and feeling  
4 overwhelmed, and many mothers acknowledged that this was having a detrimental effect on their mental  
5 health and self-esteem:  
6

7 *I'm worried [about] having a nervous breakdown or a panic attack...can't get a break from all the*  
8 *responsibilities and go somewhere for fresh air even*

9 *Finding working from home and looking after children very demanding. No time alone. No silence.*  
10 *Surrounded by people and electronics all my waking hours.*

11 *I am a keyworker who works five days of week, only while my children are at school. I am becoming*  
12 *mentally drained/exhausted constantly being on duty, it is impacting my mental health.*

13 *Homeschooling I am not cut out for this and don't feel good enough*

14  
15  
16  
17 **Loss of social support:** The loss of social support caused by lockdown, especially for those who didn't live  
18 with their partner or were single parents was highlighted as causing loneliness and isolation for some.

19 *My support network was my partner, who I cannot see due to lockdown.*

20 *Not able to see my boyfriend - feel isolated and alone once children are in bed with no adult face to face*  
21 *interaction*

22 *The isolation and loneliness has been a challenge and having to take care of my child on my own full-time*

23 *Being a single parent of a disabled child I rely on my social life/friends for my mental wellbeing and I worry*  
24 *about when it'll be safe to see/hug my immediate family who live locally*

25 **Financial and employment insecurity:** Household finances and the stress of unemployment or job  
26 insecurity related to lockdown measures were also a major worry for women. Many families were in debt,  
27 reliant on credit cards and benefits, and in insecure employment before the lockdown measures began and  
28 were only just about getting by prior to the pandemic.

29 *I have struggled financially during this time. I would like to not worry about money and bills and shopping*  
30 *and outgoings. I have enough worries being a full time carer.*

31  
32  
33  
34  
35  
36 *Worried about the financial impact of covid 19. I am currently furloughed from work but I worry that the virus*  
37 *will have an impact on the business. My husband is self-employed and is not eligible to any funds.*

38  
39 **Being unable to switch off:** Participants described being frightened of the news reports but unable to  
40 switch off, and were wondering when, if ever, things would become normal again:

41 *Worry about my mental health, I know I'm struggling. Worry about the future and how this will affect the*  
42 *country financially. Worry about my children's education & what they've missed out on.*

43 *All the bad news on the TV, and the death rate on the News. All the information on the news makes me*  
44 *panic more.*

45 *When will this end? Will it end?*

46  
47  
48  
49 **A loss of coping strategies:** For those who had existing mental health issues before lockdown, the  
50 lockdown measures had often taken away their sources of support, their normal routines and methods of  
51 coping. In addition, some respondents reported being unable to access mental health services due to  
52 Covid-19 and lockdown measures:  
53

54 *Mental health - Exercise at the gym was a coping mechanism, now closed. Can do bits at home but nothing*  
55 *like at the gym. Cannot get any gym equipment - out of stock.*

56 *Mental Health - struggling to motivate myself and to keep to a routine. Self-destructive behaviour - drink*  
57 *drugs and binge eating. I am missing my work and colleagues.*

1 *Not getting my mental health support since the lockdown. My CPN (Community Psychiatric Nurse) not*  
2 *returning my calls. It has made me a lot worse. I try to talk to my husband so I am not keeping everything*  
3 *inside*

4  
5 *Mental health, I have had previous issues in the past and am struggling and don't feel like I can approach*  
6 *my GP at the minute as it isn't an emergency*

7  
8 **Positive aspects of lockdown:** Many participants reported positive aspects to changes enforced by the  
9 lockdown, commenting that they were getting to spend more quality time with their children, were enjoying  
10 a slower pace of life, a more relaxed routine and spending less time driving and commuting.

11  
12 *Life has become a lot more relaxed over the last 3 weeks, no manic mornings trying to get everybody out of*  
13 *the house, time with kids, doing stuff with kids I would normally say 'not now' to. Get to know kids more.*  
14 *More time outside, [doing] jobs in the house that need doing.*

15  
16 *Spending more time with my husband and feeling appreciative of each other and having a relaxed day with*  
17 *the children instead of running to school to mosque and then all the extra clubs it's a more relaxed day.*

18  
19 *Ramadan is the easiest it has ever been, we are free to make up our sleep and not push ourselves too*  
20 *much, had time to do nice things during Ramadan including having a more peaceful time not having to do*  
21 *school runs, be stressed out, my husband had a chance to take a slower pace to life and not get too*  
22 *stressed.*

## 23 24 DISCUSSION

25  
26 We compared depression and anxiety during the March-June 2020 UK lockdown to pre-Covid19  
27 depression and anxiety data collected in our longitudinal birth cohort studies. We found that clinically  
28 important symptoms of depression and anxiety increased from 11% to 19% and from 11% to 16%,  
29 respectively. These findings reflect those of other longitudinal studies which have reported similar changes  
30 in mental health from before to during the Covid-19 pandemic<sup>3,4</sup>.

31  
32 We hypothesised that our vulnerable population with diverse ethnicity and high levels of deprivation would  
33 be susceptible to increases in depression and anxiety during the lockdown. Financial, food and housing  
34 insecurity all increased the odds of an increase in depression and anxiety, as did loneliness, a lack of social  
35 support, an average/poor partner relationship and a lack of physical activity.

36  
37 We also observed reduced odds of depression and anxiety in Pakistani compared to White British mothers.  
38 A recent study has identified larger increases in mental ill health from before to during the pandemic in  
39 school age children of White British compared to minority ethnic groups in the UK, which is consistent with  
40 our findings<sup>23</sup>. When we separated out the regression analyses by ethnicity, we found interesting  
41 differences in the magnitude of the associations with an increase in depression and anxiety. Mothers from a  
42 Pakistani heritage had greater odds of an increase in depression and anxiety if they were lonely or had an  
43 average/poor relationship (for depression, but not anxiety) than White British mothers. Pakistani heritage  
44 mothers had a much reduced odds of an increase in depression or anxiety if they lived in a large household  
45 compared to White British mothers.

46  
47 In contrast, mother of White British ethnicity had greater odds of an increase if they were financially  
48 insecure and/or physically inactive compared to Pakistani heritage mothers reporting the same exposures.  
49 The free text responses supported these findings, highlighting a complex inter-play of challenges  
50 contributing to poor mental health in mothers including: acute health anxieties; the mental load of managing  
51 multiple roles and responsibilities; the loss of social support and other coping strategies; pressures of  
52 financial and employment insecurity; and being unable to switch off from the pandemic.

53  
54 The ethnic differences reported in this study warrant further investigation, including an understanding of  
55 whether there are ethnic differences in relation to disclosing mental ill health symptoms, and potentially  
56 differing protective factors in different ethnic groups. We have previously reported, outside of the Covid-19  
57 context, that (a) White British mothers are more likely to have their mental ill health identified by health  
58 professionals than South Asian women, and that (b) both White British and South Asian are equally likely to  
59 disclose symptoms in self-report research questionnaires, as used here.<sup>24,25</sup> Ethnic differences in  
60 household structure, and cultural practices might provide more support in times of adversity, as we have  
found in the case of food insecurity previously<sup>26,27</sup>.



1  
2 This is a longitudinal study comparing data collected before the Covid-19 pandemic and during the March-  
3 June 2020 lockdown which has allowed us to explore change over that time period. It also provides findings  
4 from a highly ethnically diverse population, the majority of whom live in the most deprived centiles in the  
5 UK. We are not aware of other studies that have explored longitudinal change in mental health from pre- to  
6 during- the Covid-19 lockdown in a similar population.  
7

8 Respondents were mothers of children aged 0-5 and/or 9-13 which may limit the wider generalizability,  
9 though our findings are broadly similar to those from a previous longitudinal study of two UK cohorts that  
10 included adult men and women (not all of whom were mothers), and found the increased risk of poor  
11 mental health in lockdown to be greater in women<sup>4</sup>. Our pre-COVID19 measures were taken from data  
12 collected over the past 4 years, so we cannot, with confidence, attribute all changes to the pandemic and  
13 the lockdown. For example, it is possible that some of the difference reflects age related change in the  
14 women and/or their children over time. It is also possible that we have underestimated some of the adverse  
15 impact of lockdown as a significant percentage of the BiBBS participants were pregnant at baseline, which  
16 itself is associated with raised levels of mental ill health. Indeed our analysis did find reduced odds of an  
17 increase in depression and anxiety in the BiBBS compared to the BiBGU cohort. However, our analyses did  
18 not find any strong association between time since baseline data capture and the odds of an increase in  
19 depression and anxiety.  
20

21 We undertook unadjusted logistic regression analyses to explore possible factors that might explain or  
22 influence changes in mental health from before- to during- the pandemic, and repeated these separating  
23 out the two main ethnic groups. This approach avoids the difficulties inherent in interpreting the ethnicity  
24 coefficient in regression models controlling for other variables<sup>20</sup>, however it also limits the interpretation of  
25 the data. In addition, the total sample size for this mental health analysis was ~1,700 mothers and many  
26 estimates in the analyses were, as a consequence, imprecise with wide confidence intervals. These results  
27 should be treated with some caution unless replicated in larger studies.  
28

29 Whilst it is possible that our results are influenced by the survey response rate of 28%, although, these  
30 participants were representative of the BiB and BiBBS cohorts<sup>15</sup>, including on the rates of baseline  
31 depression and anxiety scores, and have demonstrated a wide variability in most characteristics (Table 1).  
32

33 We undertook stratified analyses to explore ethnic differences in how exposures related to changes in  
34 mental health between pre-pandemic times to during lockdown. However, whilst our analysis was able to  
35 look for differences between Pakistani heritage and White British mothers, we were unable to explore the  
36 heterogeneity of the 'other' ethnic group and we have no doubt missed important nuances in this population  
37 based on different social and cultural experiences.  
38

39 We will continue to follow the BiBGU and BiBBS families so that we can look at trajectories of change over  
40 time, including during any future national or regional lockdowns. At time of writing (November 2020), the  
41 UK was under a further nationwide lockdown, following a period of reduced restrictions during summer  
42 2020 and tighter regional restrictions in the more deprived cities of Northern England, including Bradford,  
43 though the autumn. The impact of further and longer periods of restrictions and lockdowns will be a focus  
44 of our study moving forwards. As the longitudinal follow-up lengthens and more data become available it  
45 may be possible to model different transitions in mental health in relation to changing social and economic  
46 circumstances. It may also be of interest to explore positive / null transitions from clinically important  
47 symptoms to mild/no symptoms, or continued mild/no symptoms despite reported exposure to adversity.  
48

49 Our results highlight the potential public health impact of lockdown on mental health, particularly in those  
50 who are lonely and economically insecure and of White British ethnicity. Mental health problems are in  
51 general less visible than physical symptoms and in particular the physical symptoms related to Covid-19,  
52 including the acutely ill patients in ICUs, but may have more significant longer-term consequences. This  
53 study also suggests a complex interplay of factors between an individuals' circumstances and the odds of  
54 worsening mental health during the pandemic. A 'one-size fits all' approach to supporting mental ill health  
55 will not be effective, instead, understanding and addressing the potential causes in different groups will be  
56 important. For example, in case of future need for social distancing measures, government and local  
57 councils should consider policies that permit 'social bubbles' that can be implemented to reduce loneliness  
58 for those at risk of mental health problems, and they as well as voluntary services should continue to focus  
59 support to those who are lonely/isolated. Policy and decision makers should also make provision for the  
60 continuing need to support and protect vulnerable families from financial, food and housing insecurity, all of

1 which were associated with poor mental health in this study. These actions will be important throughout any  
2 further regional and national lockdowns and during the post-pandemic period of recovery.  
3  
4  
5  
6  
7  
8  
9  
10  
11  
12  
13  
14  
15  
16  
17  
18  
19  
20  
21  
22  
23  
24  
25  
26  
27  
28  
29  
30  
31  
32  
33  
34  
35  
36  
37  
38  
39  
40  
41  
42  
43  
44  
45  
46  
47  
48  
49  
50  
51  
52  
53  
54  
55  
56  
57  
58  
59  
60

For peer review only

## DISSEMINATION DECLARATION

The findings of the study were also shared with our community research advisory groups to enhance interpretation. We will share our findings with all participants using a combination of social media, infographics posted to participants and community dissemination events

## DATA (AND SOFTWARE) AVAILABILITY

Born in Bradford offer open access to their data resources. Available data and procedures to access this can be found at: <https://borninbradford.nhs.uk/research/how-to-access-data/>

## AUTHOR CONTRIBUTIONS

JD was involved in the concept and study design, design of the data collection tools, overall supervision of the study and data collection, wrote the statistical analysis plan, and drafted and revised the paper. She is guarantor. BK was involved in the design of data collection tools, wrote the statistical analysis plan, conducted all statistical analyses, and drafted and revised the paper. BL devised the coding framework for free text responses, analysed the data and drafted and revised the paper. SB was involved in the concept and study design, design of the data collection tools, supervision of the study and data collection, and reviewing and revising the paper. CC was involved in the concept and study design, and reviewing and revising the paper. KW was involved in design of the data collection tools, data curation, analysis, reviewing and revising the paper. KS was involved in the study design, design of the data collection tools, supervision of the study and data collection, and reviewing and revising the paper. KC was involved in the study design, design of the data collection tools, supervision of the study and data collection, data curation and reviewing and revising the paper. MB involved in the study design, and drafted and revised the paper. NS advised on the clinical significance of changes in mental ill health, revising the statistical analysis plan, and drafted and revised the paper. TS was involved in the concept and study design, supervision and support to junior members of the team and drafted and revised the paper. DAL was involved in the concept and study design, design of the data collection tools, and drafted and revised the paper. JW was involved in the concept and study design, design of the data collection tools, supervision and support to junior members of the team and drafted and revised the paper. RM was involved in the concept and study design, design of the data collection tools, revised the statistical analysis plan, and drafted and revised the paper. KP was involved in the concept and study design, design of the data collection tools, revised the statistical analysis plan, supervision and support to junior members of the team and drafted and revised the paper.

## COMPETING INTERESTS

All authors have completed the ICMJE uniform disclosure form at [www.icmje.org/coi\\_disclosure.pdf](http://www.icmje.org/coi_disclosure.pdf) and declare: all authors had financial support from funding bodies listed below for the submitted work; no financial relationships with any organisations that might have an interest in the submitted work in the previous three years; no other relationships or activities that could appear to have influenced the submitted work, with the exception of DAL who declares previous support from Roche Diagnostics and Medtronic Ltd for research unrelated to that presented here.

## FUNDING INFORMATION

This study was funded by The Health foundation Covid-19 Award (2301201), with further contributions from: A Wellcome Trust infrastructure grant (WT101597MA); A joint grant from the UK Medical Research Council (MRC) and UK Economic and Social Science Research Council (ESRC): MR/N024391/1; The National Institute for Health Research under its Applied Research Collaboration Yorkshire and Humber (NIHR200166); ActEarly UK Prevention Research Partnership Consortium (MR/S037527/1); Better Start Bradford through The National Lottery Community Fund; and the British Heart Foundation (CS/16/4/32482). DAL works in a unit that received support from the University of Bristol and UK Medical Research Council (MC\_UU\_00011/6) and is a UK National Institute of Health Research senior Investigator (NF-0616-10102)

## ACKNOWLEDGEMENTS

Born in Bradford is only possible because of the enthusiasm and commitment of the children and parents in BiB. We are grateful to all the participants, parent governors and community research advisory group members, schools, health professionals and researchers who have made Born in Bradford happen.

This report is independent research partly funded by the National Institute for Health Research Yorkshire and Humber ARC. The views expressed in this publication are those of the authors and not necessarily those of the National Institute for Health Research or the Department of Health and Social Care.

## TRANSPARENCY STATEMENT

The lead author (the manuscript's guarantor) affirms that the manuscript is an honest, accurate, and transparent account of the study being reported; that no important aspects of the study have been omitted; and that any discrepancies from the study as originally planned (and, if relevant, registered) have been explained.

For peer review only

## 1. REFERENCES

1. Coronavirus (Covid-19) UK Government Response. <https://www.gov.uk/coronavirus>. Accessed 27.11.20
2. Number of coronavirus (COVID-19) cases and risk in the UK. UK Government Guidance. <https://www.gov.uk/guidance/coronavirus-covid-19-information-for-the-public> . Accessed 27.11.20
3. Office of National Statistics (2020). Coronavirus and depression in adults, Great Britain: June 2020. <https://www.ons.gov.uk/peoplepopulationandcommunity/wellbeing/articles/coronavirusanddepressioninadultsgreatbritain/june2020>. Accessed 27.11.20
4. Kwong ASF, Pearson RM, Adams MJ, et al., Mental health during the COVID-19 pandemic in two longitudinal UK population cohorts. *MedRxiv* 2020; 20133116. doi: 10.1101/2020.06.16.20133116
5. Pierce M, Hope H, Ford T, et al., Mental health before and during the COVID-19 pandemic: a longitudinal probability sample survey of the UK population. *Lancet Psychiatry* 2020, [https://doi.org/10.1016/S2215-0366\(20\)30308-4](https://doi.org/10.1016/S2215-0366(20)30308-4)
6. Mind (2020). The mental health emergency: how has the coronavirus pandemic impacted our mental health? London: Mind. Available at: [mind.org.uk](http://mind.org.uk). Accessed 27.11.20
7. Fancourt D, Steptoe A, Bu F. Trajectories of depression and anxiety during enforced isolation due to COVID-19: longitudinal analyses of 59,318 adults in the UK with and without diagnosed mental illness. *medRxiv* 2020. doi: <https://doi.org/10.1101/2020.06.03.20120923>
8. Bignall T, Jeraj S, Helsby E, Butt J. Racial disparities in mental health: Literature and evidence review. Race Equality Foundation 2019. <https://raceequalityfoundation.org.uk/wp-content/uploads/2020/03/mental-health-report-v5-2.pdf>. Accessed 27.11.20
9. Grey T, Sewell H, Shapiro G, Ashraf F. Mental Health Inequalities Facing U.K. Minority Ethnic Populations Causal Factors and Solutions. *J Psychological Issues in Organizational Culture*. 2013; 3 (S1).
10. Public Health England. COVID-19: mental health and wellbeing surveillance report: <https://www.gov.uk/government/publications/covid-19-mental-health-and-wellbeing-surveillance-report/2-important-findings-so-far#which-population-groups-appear-to-be-disproportionally-affected>. Accessed 27.11.20
11. Wright J, Raynor P, Tuffnell D, et al. Cohort Profile: The Born in Bradford multi-ethnic family cohort study. *International Journal of Epidemiology*, Volume 42, Issue 4, August 2013, Pages 978–991, <https://doi.org/10.1093/ije/dys112>
12. Bird PK, McEachan RRC, Mon-Williams M, Small N, West J, Whincup P, Wright J, Andrews E, Barber SE, Hill LJB *et al*: Growing up in Bradford: protocol for the age 7–11 follow up of the Born in Bradford birth cohort. *BMC Public Health* 2019, 19(1):939.
13. Dickerson J, Bird PK, McEachan RRC, Pickett KE, Waiblinger D, Uphoff E, Mason D, Bryant M, Bywater T, Bowyer-Crane C *et al*: Born in Bradford's Better Start: an experimental birth cohort study to evaluate the impact of early life interventions. *BMC Public Health* 2016, 16(1):711.
14. McEachan RRC, Dickerson J, Bridges S *et al*. The Born in Bradford COVID-19 Research Study: Protocol for an adaptive mixed methods research study to gather actionable intelligence on the impact of COVID-19 on health inequalities amongst families living in Bradford [version 1; peer review: 3 approved]. *Wellcome Open Res* 2020, 5:191 (<https://doi.org/10.12688/wellcomeopenres.16129.1>)
15. Dickerson J, Kelly B, Lockyer B *et al*. Experiences of lockdown during the Covid-19 pandemic: descriptive findings from a survey of families in the Born in Bradford study [version 2; peer review: 2 approved]. *Wellcome Open Res* 2021, 5:228 (<https://doi.org/10.12688/wellcomeopenres.16317.2>)
16. Kroenke K, Strine TW, Spitzer RL, Williams JBW, Berry JT, Mokdad AH: The PHQ-8 as a measure of current depression in the general population. *Journal of Affective Disorders* 2009, 114(1):163-173.

17. Löwe B, Decker O, Müller S, Brähler E, Schellberg D, Herzog W, Herzberg PY: Validation and Standardization of the Generalized Anxiety Disorder Screener (GAD-7) in the General Population. *Medical Care* 2008, 46(3):266-274.
18. Husain N, Waheed W, Tomenson B, Creed F. The validation of personal health questionnaire amongst people of Pakistani family origin living in the United Kingdom. *Journal of Affective Disorders* 2007, 97: 261-264.
19. McMillan D, Gilbody S, Richards D. Defining successful treatment outcome in depression using the PHQ-9: A comparison of methods. *J. Affective Disorders*. 2010: 127; 122–129
20. VanderWeele, T. J., & Robinson, W. R. On the causal interpretation of race in regressions adjusting for confounding and mediating variables. *Epidemiology*. 2014: 25(4), 473–484.
21. StataCorp. 2017. Stata Statistical Software: Release 15. College Station, TX: StataCorp LLC.
22. Braun V, Clarke V: Using thematic analysis in psychology. *Qualitative Research in Psychology* 2006, 3(2):77-101.
23. Vizard T, Sadler K, Ford T, Newlove-Delgado T, McManus S, Marcheselli F, Davis J, Williams T, Leach C, Mandalia D, Cartwright C. Mental Health of Children and Young People in England, 2020. Health and Social Care Information Centre 2020. [https://files.digital.nhs.uk/AF/AECD6B/mhcyp\\_2020\\_rep\\_v2.pdf](https://files.digital.nhs.uk/AF/AECD6B/mhcyp_2020_rep_v2.pdf)
24. Prady SL, Pickett KE, Petherick ES, Gilbody S, Croudace T, Mason D, Sheldon TA, Wright J. (2016). Evaluation of ethnic disparities in detection of depression and anxiety in primary care during the maternal period: combined analysis of routine and cohort data. *The British journal of psychiatry*, 208(5), 453-61. DOI 10.1192/bjp.bp.114.158832. PMID 26795424
25. Prady SL, Pickett KE, Gilbody S, Petherick ES, Mason D, Sheldon TA, and Wright J (2016). Variation and ethnic inequalities in treatment of common mental disorders before, during and after pregnancy: combined analysis of routine and research data in the Born in Bradford cohort. *BMC Psychiatry*, 16(99), DOI 10.1186/s12888-016-0805-x PMID 27071711
26. Power M, Uphoff N, Stewart-Knox B et al., Food insecurity and socio-demographic characteristics in two UK ethnic groups: an analysis of women in the Born in Bradford cohort. *Journal of Public Health*, 2017. 40(1): p. 32-40.
27. Yang T.C, Sahota P, Pickett K, Bryant M. Association of food security status with overweight and dietary intake: exploration of White British and Pakistani-origin families in the Born in Bradford cohort. *Nutrition Journal*, 2018. 17(1): p. 48.



1 **FIGURE LEGENDS**  
2  
3

4 **Figure 1: PHQ-8 at pre-Covid19 and Covid19 lockdown survey with change between categories**  
5

6 *Note: This graph presents findings from participants who had complete pre-Covid19 and Covid19*  
7 *lockdown PHQ-8 scores (n=1730)*  
8  
9

10 **Figure 2: GAD-7 at pre-Covid19 and Covid19 lockdown survey with change between categories**  
11

12 *Note: This graph presents findings from participants who had complete pre-Covid19 and Covid19*  
13 *lockdown GAD-7 scores (n=1634)*  
14  
15  
16  
17  
18  
19  
20  
21  
22  
23  
24  
25  
26  
27  
28  
29  
30  
31  
32  
33  
34  
35  
36  
37  
38  
39  
40  
41  
42  
43  
44  
45  
46  
47  
48  
49  
50  
51  
52  
53  
54  
55  
56  
57  
58  
59  
60

For peer review only



**Table 1: Sample Characteristics of Mothers who responded to the BiB Covid-19 survey (n=1860)**

|                                                                                             |       |               |
|---------------------------------------------------------------------------------------------|-------|---------------|
| <b>Financial security</b>                                                                   |       |               |
| Living comfortably                                                                          | 354   | 20% (18%-22%) |
| Doing alright                                                                               | 766   | 42% (40%-45%) |
| Just about getting by                                                                       | 462   | 26% (24%-28%) |
| Finding it quite/ very difficult                                                            | 223   | 12% (11%-14%) |
| Missing                                                                                     | 55    |               |
| <b>Change in financial status (compared to 3 months prior, as asked in lockdown survey)</b> |       |               |
| Better off                                                                                  | 166   | 10% (8%-11%)  |
| About the same                                                                              | 989   | 58% (55%-60%) |
| Worse off                                                                                   | 562   | 33% (31%-35%) |
| Missing                                                                                     | 143   |               |
| <b>Index of Multiple Deprivation 2019 Quintile</b>                                          |       |               |
| 1: Most Deprived                                                                            | 1,211 | 65% (63%-67%) |
| 2                                                                                           | 390   | 21% (19%-23%) |
| 3                                                                                           | 139   | 7% (6%-9%)    |
| 4                                                                                           | 88    | 5% (4%-6%)    |
| 5: Least Deprived                                                                           | 29    | 2% (1%-2%)    |
| Missing                                                                                     | 3     |               |
| <b>Employment status of main earner</b>                                                     |       |               |
| Employed - working from home                                                                | 393   | 22% (20%-24%) |
| Employed: going into work                                                                   | 567   | 32% (30%-34%) |
| On furlough                                                                                 | 271   | 15% (14%-17%) |
| Self-employed: working                                                                      | 147   | 8% (7%-10%)   |
| Self-employed: not working                                                                  | 200   | 11% (10%-13%) |
| Unemployed                                                                                  | 208   | 12% (10%-13%) |
| Missing                                                                                     | 74    |               |
| <b>Whether respondent is a keyworker</b>                                                    |       |               |
| No                                                                                          | 1,259 | 68% (66%-71%) |
| Yes                                                                                         | 579   | 32% (29%-34%) |
| Missing                                                                                     | 22    |               |
| <b>Whether anyone in household is clinically vulnerable to Covid-19</b>                     |       |               |
| No                                                                                          | 1,419 | 77% (75%-79%) |
| Yes                                                                                         | 426   | 23% (21%-25%) |
| Missing                                                                                     | 15    |               |
| <b>Whether anyone in household is currently/ has previously self-isolated</b>               |       |               |
| No                                                                                          | 1,331 | 72% (70%-74%) |
| Yes                                                                                         | 508   | 28% (26%-30%) |
| Missing                                                                                     | 21    |               |
| <b>Number of children in household</b>                                                      |       |               |
| One                                                                                         | 387   | 21% (19%-23%) |
| Two                                                                                         | 699   | 38% (35%-40%) |
| Three                                                                                       | 451   | 24% (22%-26%) |
| Four or more                                                                                | 323   | 17% (16%-19%) |
| <b>Total household size</b>                                                                 |       |               |

|    |                                                                                                                        |       |               |
|----|------------------------------------------------------------------------------------------------------------------------|-------|---------------|
| 1  | Two/ Three                                                                                                             | 321   | 17% (16%-19%) |
| 2  | Four/ Five                                                                                                             | 943   | 51% (49%-53%) |
| 3  | Six or more                                                                                                            | 583   | 32% (29%-34%) |
| 4  | Missing                                                                                                                | 13    |               |
| 5  |                                                                                                                        |       |               |
| 6  | <b>Whether single parent</b>                                                                                           |       |               |
| 7  | No                                                                                                                     | 1,604 | 88% (86%-89%) |
| 8  | Yes                                                                                                                    | 222   | 12% (11%-14%) |
| 9  | Missing                                                                                                                | 34    |               |
| 10 |                                                                                                                        |       |               |
| 11 |                                                                                                                        |       |               |
| 12 | <b>Quality of relationship with partner (for those married or in a relationship, n=1604)</b>                           |       |               |
| 13 | Excellent                                                                                                              | 783   | 51% (48%-53%) |
| 14 | Good                                                                                                                   | 598   | 39% (36%-41%) |
| 15 | Average                                                                                                                | 129   | 8% (7%-10%)   |
| 16 | Poor                                                                                                                   | 23    | 1% (1%-2%)    |
| 17 | Very poor                                                                                                              | 10    | 1% (0%-1%)    |
| 18 | Missing                                                                                                                | 61    |               |
| 19 |                                                                                                                        |       |               |
| 20 | <b>Loneliness: How often felt lonely in the past week</b>                                                              |       |               |
| 21 | None, or almost none of the time                                                                                       | 998   | 57% (55%-60%) |
| 22 | Some of the time                                                                                                       | 555   | 32% (30%-34%) |
| 23 | Most of the time                                                                                                       | 131   | 8% (6%-9%)    |
| 24 | All, or almost all of the time                                                                                         | 56    | 3% (2%-4%)    |
| 25 | Missing                                                                                                                | 120   |               |
| 26 |                                                                                                                        |       |               |
| 27 | <b>Social support: how easy to get help from friends/ neighbours if needed</b>                                         |       |               |
| 28 | Very difficult                                                                                                         | 101   | 6% (5%-7%)    |
| 29 | Difficult                                                                                                              | 146   | 8% (7%-9%)    |
| 30 | Possible                                                                                                               | 529   | 29% (27%-31%) |
| 31 | Easy                                                                                                                   | 529   | 29% (27%-31%) |
| 32 | Very easy                                                                                                              | 513   | 28% (26%-30%) |
| 33 | Missing                                                                                                                | 42    |               |
| 34 |                                                                                                                        |       |               |
| 35 |                                                                                                                        |       |               |
| 36 | <b>Food security: How often is it true that food does not last</b>                                                     |       |               |
| 37 | Never                                                                                                                  | 1,379 | 79% (77%-81%) |
| 38 | Sometimes                                                                                                              | 279   | 16% (14%-18%) |
| 39 | Often                                                                                                                  | 91    | 5% (4%-6%)    |
| 40 | Missing                                                                                                                | 111   |               |
| 41 |                                                                                                                        |       |               |
| 42 | <b>Housing security: Whether worried about eviction/ repossession</b>                                                  |       |               |
| 43 | Strongly disagree or disagree                                                                                          | 1,250 | 71% (68%-73%) |
| 44 | Neither                                                                                                                | 328   | 19% (17%-20%) |
| 45 | Strongly agree/ agree                                                                                                  | 194   | 11% (10%-12%) |
| 46 | Missing                                                                                                                | 88    |               |
| 47 |                                                                                                                        |       |               |
| 48 |                                                                                                                        |       |               |
| 49 | <b>Job security: Whether expect main earner to still have job in 12 months (for those currently employed (n=1652))</b> |       |               |
| 50 | No                                                                                                                     | 77    | 5% (4%-6%)    |
| 51 | Yes                                                                                                                    | 979   | 61% (59%-64%) |
| 52 | Don't know                                                                                                             | 537   | 34% (31%-36%) |
| 53 | Missing                                                                                                                | 59    |               |
| 54 |                                                                                                                        |       |               |
| 55 |                                                                                                                        |       |               |
| 56 | <b>Housing conditions: Whether damp in house</b>                                                                       |       |               |
| 57 | No                                                                                                                     | 1,307 | 71% (69%-73%) |
| 58 | Yes                                                                                                                    | 534   | 29% (27%-31%) |
| 59 | Missing                                                                                                                | 19    |               |
| 60 |                                                                                                                        |       |               |

**Frequency of physical activity currently**

|                    |     |               |
|--------------------|-----|---------------|
| Never              | 239 | 13% (12%-15%) |
| 1 or 2 days a week | 489 | 27% (25%-29%) |
| Most days          | 516 | 28% (26%-30%) |
| Every day          | 586 | 32% (30%-34%) |
| Missing            | 30  |               |

**Change in frequency of physical activity since lockdown**

|                |     |               |
|----------------|-----|---------------|
| Less           | 766 | 48% (46%-51%) |
| About the same | 408 | 26% (24%-28%) |
| More           | 419 | 26% (24%-29%) |
| Missing        | 267 |               |

For peer review only

**Table 2: Depression and Anxiety Scores in the Pre-Covid19 and Covid-19 surveys (n=1860).**

|                                                  | Pre-Covid19 survey |                     | Covid-19 survey |                     |
|--------------------------------------------------|--------------------|---------------------|-----------------|---------------------|
|                                                  | N                  | Percentage (95% CI) | N               | Percentage (95% CI) |
| <b>Depression category (PHQ-8)</b>               |                    |                     |                 |                     |
| None (PHQ-8 score 0 to 4)                        | 1187               | 65% (63%-68%)       | 1001            | 56% (54%-59%)       |
| Mild (PHQ-8 score 5 to 9)                        | 414                | 23% (21%-25%)       | 425             | 24% (22%-26%)       |
| Moderate (PHQ-8 score 10 to 14)                  | 135                | 7% (6%-9%)          | 199             | 11% (10%-13%)       |
| Moderately severe/ severe (PHQ-8 score 15 to 24) | 77                 | 4% (3%-5%)          | 150             | 8% (7%-10%)         |
| Missing                                          | 47                 |                     | 85              |                     |
| <b>Anxiety category (GAD7)</b>                   |                    |                     |                 |                     |
| None (GAD-7 score 0 to 4)                        | 1280               | 75% (72%-77%)       | 1075            | 61% (58%-63%)       |
| Mild (GAD-7 score 5 to 9)                        | 270                | 16% (14%-18%)       | 408             | 23% (21%-25%)       |
| Moderate (GAD-7 score 10 to 14)                  | 100                | 6% (5%-7%)          | 165             | 9% (8%-11%)         |
| Severe (GAD-7 score 15 to 21)                    | 67                 | 4% (3%-5%)          | 124             | 7% (6%-8%)          |
| Missing                                          | 143                |                     | 88              |                     |

**Table 3: Odds ratios (with 95% CI) from unadjusted logistic regression models for an increase of 5 points or more on PHQ-8 and GAD-7 between pre-Covid19 and Covid-19 lockdown survey.**

| Exposure                                                   | PHQ-8 increase $\geq 5$ |            |             | GAD-7 increase $\geq 5$ |            |             |
|------------------------------------------------------------|-------------------------|------------|-------------|-------------------------|------------|-------------|
|                                                            | Odds Ratio              | Low 95% CI | High 95% CI | Odds Ratio              | Low 95% CI | High 95% CI |
| <b>Ethnicity</b>                                           |                         |            |             |                         |            |             |
| <b>(Reference: White British)</b>                          |                         |            |             |                         |            |             |
| Pakistani heritage                                         | 0.88                    | 0.68       | 1.15        | 0.94                    | 0.72       | 1.23        |
| <b>Age group</b>                                           |                         |            |             |                         |            |             |
| <b>(Reference: Under 30 years)</b>                         |                         |            |             |                         |            |             |
| 30 to 34 years                                             | 1.01                    | 0.66       | 1.54        | 0.90                    | 0.57       | 1.42        |
| 35 to 39 years                                             | 0.89                    | 0.59       | 1.35        | 0.99                    | 0.64       | 1.53        |
| 40 to 44 years                                             | 1.04                    | 0.69       | 1.58        | 0.88                    | 0.57       | 1.38        |
| 45 years plus                                              | 0.92                    | 0.59       | 1.45        | 1.02                    | 0.64       | 1.63        |
| <b>Financial security at pre-Covid19 survey</b>            |                         |            |             |                         |            |             |
| <b>(Reference: Living comfortably)</b>                     |                         |            |             |                         |            |             |
| Doing alright                                              | 1.07                    | 0.81       | 1.42        | 1.19                    | 0.89       | 1.59        |
| Just about getting by                                      | 1.72                    | 1.23       | 2.40        | 1.66                    | 1.17       | 2.35        |
| Finding it quite/ very difficult                           | 1.70                    | 1.03       | 2.80        | 2.39                    | 1.44       | 3.98        |
| <b>Financial security at lockdown survey</b>               |                         |            |             |                         |            |             |
| <b>(Reference: Living comfortably)</b>                     |                         |            |             |                         |            |             |
| Doing alright                                              | 1.74                    | 1.18       | 2.56        | 1.47                    | 1.00       | 2.17        |
| Just about getting by                                      | 3.52                    | 2.36       | 5.26        | 3.20                    | 2.15       | 4.76        |
| Finding it quite/ very difficult                           | 6.23                    | 3.96       | 9.80        | 6.03                    | 3.82       | 9.51        |
| <b>Change in financial status compared to 3 months ago</b> |                         |            |             |                         |            |             |
| <b>(Reference: Better off)</b>                             |                         |            |             |                         |            |             |
| About the same                                             | 0.65                    | 0.43       | 0.98        | 0.88                    | 0.55       | 1.40        |
| Worse off                                                  | 1.36                    | 0.89       | 2.01        | 1.99                    | 1.25       | 3.19        |
| <b>Index of Multiple Deprivation 2019 Quintile</b>         |                         |            |             |                         |            |             |
| <b>(Reference: 1 Most deprived fifth)</b>                  |                         |            |             |                         |            |             |
| 2                                                          | 0.90                    | 0.67       | 1.21        | 1.22                    | 0.92       | 1.63        |
| 3                                                          | 0.91                    | 0.58       | 1.41        | 0.87                    | 0.55       | 1.39        |
| 4                                                          | 0.76                    | 0.43       | 1.34        | 0.98                    | 0.57       | 1.68        |
| 5 Least deprived fifth                                     | 0.85                    | 0.34       | 2.13        | 0.99                    | 0.39       | 2.48        |
| Per 1 fifth increase in lower deprivation                  | 1.07                    | 0.94       | 1.25        | 1.00                    | 0.88       | 1.13        |
| <b>Employment status of main earner</b>                    |                         |            |             |                         |            |             |
| <b>(Reference: Employed and working from home)</b>         |                         |            |             |                         |            |             |
| Employed: going into work                                  | 1.18                    | 0.84       | 1.65        | 1.20                    | 0.85       | 1.69        |
| On furlough                                                | 1.19                    | 0.79       | 1.79        | 1.29                    | 0.85       | 1.94        |
| Self-employed: working                                     | 0.90                    | 0.53       | 1.51        | 0.92                    | 0.55       | 1.57        |
| Self-employed: not working                                 | 1.49                    | 0.97       | 2.27        | 1.31                    | 0.84       | 2.04        |
| Unemployed                                                 | 2.03                    | 1.34       | 3.09        | 2.23                    | 1.44       | 3.44        |

|    |                                                      |      |      |       |      |      |       |
|----|------------------------------------------------------|------|------|-------|------|------|-------|
| 1  | <b>Whether respondent is a keyworker</b>             |      |      |       |      |      |       |
| 2  | <b>(Reference: No)</b>                               |      |      |       |      |      |       |
| 3  | Yes                                                  | 0.99 | 0.77 | 1.27  | 1.05 | 0.82 | 1.35  |
| 4  |                                                      |      |      |       |      |      |       |
| 5  | <b>Whether anyone in household is clinically</b>     |      |      |       |      |      |       |
| 6  | <b>vulnerable to Covid-19</b>                        |      |      |       |      |      |       |
| 7  | <b>(Reference: No)</b>                               |      |      |       |      |      |       |
| 8  | Yes                                                  | 1.68 | 1.29 | 2.19  | 1.53 | 1.17 | 2.01  |
| 9  |                                                      |      |      |       |      |      |       |
| 10 | <b>Whether anyone in household is currently/ has</b> |      |      |       |      |      |       |
| 11 | <b>previously self-isolated</b>                      |      |      |       |      |      |       |
| 12 | <b>(Reference: No)</b>                               |      |      |       |      |      |       |
| 13 | Yes                                                  | 1.59 | 1.24 | 2.04  | 1.48 | 1.14 | 1.92  |
| 14 |                                                      |      |      |       |      |      |       |
| 15 | <b>Number of children in household</b>               |      |      |       |      |      |       |
| 16 | <b>(Reference: One)</b>                              |      |      |       |      |      |       |
| 17 | Two                                                  | 1.20 | 0.87 | 1.67  | 1.05 | 0.76 | 1.45  |
| 18 | Three                                                | 1.39 | 0.98 | 1.98  | 1.20 | 0.84 | 1.71  |
| 19 | Four or more                                         | 1.12 | 0.76 | 1.65  | 0.93 | 0.62 | 1.39  |
| 20 |                                                      |      |      |       |      |      |       |
| 21 | <b>Total household size</b>                          |      |      |       |      |      |       |
| 22 | <b>(Reference: Less than four)</b>                   |      |      |       |      |      |       |
| 23 | Four or Five                                         | 0.73 | 0.53 | 0.99  | 0.95 | 0.69 | 1.32  |
| 24 | Six or more                                          | 0.72 | 0.51 | 1.00  | 0.90 | 0.63 | 1.29  |
| 25 |                                                      |      |      |       |      |      |       |
| 26 | <b>Whether single parent</b>                         |      |      |       |      |      |       |
| 27 | <b>(Reference: No)</b>                               |      |      |       |      |      |       |
| 28 | Yes                                                  | 1.66 | 1.18 | 2.33  | 1.28 | 0.89 | 1.85  |
| 29 |                                                      |      |      |       |      |      |       |
| 30 | <b>Quality of relationship with partner</b>          |      |      |       |      |      |       |
| 31 | <b>(Reference: Excellent)</b>                        |      |      |       |      |      |       |
| 32 | Good                                                 | 1.93 | 1.45 | 2.57  | 1.82 | 1.35 | 2.44  |
| 33 | Average to poor                                      | 3.64 | 2.44 | 5.43  | 5.07 | 3.37 | 7.62  |
| 34 |                                                      |      |      |       |      |      |       |
| 35 | <b>Loneliness</b>                                    |      |      |       |      |      |       |
| 36 | <b>(Reference: Not lonely)</b>                       |      |      |       |      |      |       |
| 37 | Lonely most/ all of the time                         | 8.37 | 5.70 | 12.27 | 8.50 | 5.71 | 12.65 |
| 38 |                                                      |      |      |       |      |      |       |
| 39 | <b>Social support</b>                                |      |      |       |      |      |       |
| 40 | <b>(Reference: Easy to get support)</b>              |      |      |       |      |      |       |
| 41 | Not easy to get support                              | 2.25 | 1.78 | 2.86  | 2.13 | 1.67 | 2.73  |
| 42 |                                                      |      |      |       |      |      |       |
| 43 | <b>Food security</b>                                 |      |      |       |      |      |       |
| 44 | <b>(Reference: Secure)</b>                           |      |      |       |      |      |       |
| 45 | Insecure - Often true that food does not last        | 3.33 | 2.09 | 5.28  | 3.46 | 2.15 | 5.58  |
| 46 |                                                      |      |      |       |      |      |       |
| 47 | <b>Housing security</b>                              |      |      |       |      |      |       |
| 48 | <b>(Reference: Secure)</b>                           |      |      |       |      |      |       |
| 49 | Insecure - Worried about eviction/ repossession      | 3.29 | 2.36 | 4.58  | 3.00 | 2.11 | 4.25  |
| 50 |                                                      |      |      |       |      |      |       |
| 51 | <b>Job security: whether expect main earner to</b>   |      |      |       |      |      |       |
| 52 | <b>still have job in 12 months</b>                   |      |      |       |      |      |       |
| 53 | <b>(Reference: Yes)</b>                              |      |      |       |      |      |       |
| 54 |                                                      |      |      |       |      |      |       |
| 55 |                                                      |      |      |       |      |      |       |
| 56 |                                                      |      |      |       |      |      |       |
| 57 |                                                      |      |      |       |      |      |       |
| 58 |                                                      |      |      |       |      |      |       |
| 59 |                                                      |      |      |       |      |      |       |
| 60 |                                                      |      |      |       |      |      |       |

|    |                                                       |      |      |      |      |      |      |
|----|-------------------------------------------------------|------|------|------|------|------|------|
| 1  | No                                                    | 0.84 | 0.49 | 1.43 | 0.96 | 0.56 | 1.64 |
| 2  |                                                       |      |      |      |      |      |      |
| 3  |                                                       |      |      |      |      |      |      |
| 4  | <b>Housing conditions</b>                             |      |      |      |      |      |      |
| 5  | <b>(Reference: No damp in house)</b>                  |      |      |      |      |      |      |
| 6  | Damp in house                                         | 1.85 | 1.45 | 2.38 | 1.57 | 1.21 | 2.03 |
| 7  |                                                       |      |      |      |      |      |      |
| 8  | <b>Frequency of physical activity</b>                 |      |      |      |      |      |      |
| 9  | <b>(Reference: Every day)</b>                         |      |      |      |      |      |      |
| 10 | Most days                                             | 1.58 | 1.15 | 2.18 | 1.67 | 1.21 | 2.31 |
| 11 | 1 or 2 days a week                                    | 1.93 | 1.40 | 2.67 | 1.67 | 1.20 | 2.31 |
| 12 | Never                                                 | 3.13 | 2.15 | 4.56 | 2.55 | 1.72 | 3.78 |
| 13 |                                                       |      |      |      |      |      |      |
| 14 |                                                       |      |      |      |      |      |      |
| 15 | <b>Change in frequency of physical activity since</b> |      |      |      |      |      |      |
| 16 | <b>lockdown</b>                                       |      |      |      |      |      |      |
| 17 | <b>(Reference: More than before)</b>                  |      |      |      |      |      |      |
| 18 | About the same                                        | 0.66 | 0.45 | 0.97 | 0.82 | 0.56 | 1.21 |
| 19 | Less than before                                      | 1.27 | 0.94 | 1.72 | 1.43 | 1.04 | 1.95 |
| 20 |                                                       |      |      |      |      |      |      |
| 21 |                                                       |      |      |      |      |      |      |
| 22 | <b>Time between baseline and Covid-19 lockdown</b>    |      |      |      |      |      |      |
| 23 | <b>survey</b>                                         |      |      |      |      |      |      |
| 24 | Time (in Months)                                      | 1.00 | 0.99 | 1.01 | 1.00 | 0.99 | 1.01 |
| 25 |                                                       |      |      |      |      |      |      |
| 26 | <b>Cohort Source</b>                                  |      |      |      |      |      |      |
| 27 | <b>(Reference: BiBGU)</b>                             |      |      |      |      |      |      |
| 28 | BiBBS                                                 | 0.84 | 0.64 | 1.10 | 0.84 | 0.63 | 1.12 |
| 29 |                                                       |      |      |      |      |      |      |
| 30 |                                                       |      |      |      |      |      |      |
| 31 |                                                       |      |      |      |      |      |      |
| 32 |                                                       |      |      |      |      |      |      |
| 33 |                                                       |      |      |      |      |      |      |
| 34 |                                                       |      |      |      |      |      |      |
| 35 |                                                       |      |      |      |      |      |      |
| 36 |                                                       |      |      |      |      |      |      |
| 37 |                                                       |      |      |      |      |      |      |
| 38 |                                                       |      |      |      |      |      |      |
| 39 |                                                       |      |      |      |      |      |      |
| 40 |                                                       |      |      |      |      |      |      |
| 41 |                                                       |      |      |      |      |      |      |
| 42 |                                                       |      |      |      |      |      |      |
| 43 |                                                       |      |      |      |      |      |      |
| 44 |                                                       |      |      |      |      |      |      |
| 45 |                                                       |      |      |      |      |      |      |
| 46 |                                                       |      |      |      |      |      |      |
| 47 |                                                       |      |      |      |      |      |      |
| 48 |                                                       |      |      |      |      |      |      |
| 49 |                                                       |      |      |      |      |      |      |
| 50 |                                                       |      |      |      |      |      |      |
| 51 |                                                       |      |      |      |      |      |      |
| 52 |                                                       |      |      |      |      |      |      |
| 53 |                                                       |      |      |      |      |      |      |
| 54 |                                                       |      |      |      |      |      |      |
| 55 |                                                       |      |      |      |      |      |      |
| 56 |                                                       |      |      |      |      |      |      |
| 57 |                                                       |      |      |      |      |      |      |
| 58 |                                                       |      |      |      |      |      |      |
| 59 |                                                       |      |      |      |      |      |      |
| 60 |                                                       |      |      |      |      |      |      |



**Table 4a: Odds ratios (with 95% CI) from unadjusted logistic regression models for an increase of 5 points or more on PHQ-8 between pre-Covid19 and Covid-19 lockdown survey for White British and Pakistani heritage mothers.**

| Exposure                                                           | White British |            |             | Pakistani Heritage |            |             |
|--------------------------------------------------------------------|---------------|------------|-------------|--------------------|------------|-------------|
|                                                                    | Odds Ratio    | Low 95% CI | High 95% CI | Odds Ratio         | Low 95% CI | High 95% CI |
| <b>Financial security (Reference: Living comfortably)</b>          |               |            |             |                    |            |             |
| Doing alright                                                      | 2.00          | 1.12       | 3.56        | 1.70               | 0.88       | 3.27        |
| Just about getting by                                              | 3.98          | 2.15       | 7.38        | 3.03               | 1.56       | 5.88        |
| Finding it quite/ very difficult                                   | 12.14         | 5.15       | 28.60       | 5.79               | 2.90       | 11.56       |
| <b>Food security (Reference: Secure)</b>                           |               |            |             |                    |            |             |
| Insecure                                                           | 3.73          | 1.58       | 8.77        | 4.13               | 2.08       | 8.17        |
| <b>Housing security (Reference: Secure)</b>                        |               |            |             |                    |            |             |
| Insecure                                                           | 4.14          | 2.07       | 8.29        | 3.20               | 1.99       | 5.16        |
| <b>Loneliness (Reference: not lonely)</b>                          |               |            |             |                    |            |             |
| Lonely most/ all of the time                                       | 7.17          | 3.66       | 14.01       | 11.22              | 6.45       | 19.53       |
| <b>Social support (Reference: Easy to get support)</b>             |               |            |             |                    |            |             |
| Not Easy                                                           | 2.08          | 1.39       | 3.10        | 2.20               | 1.54       | 3.14        |
| <b>Quality of relationship with partner (Reference: Excellent)</b> |               |            |             |                    |            |             |
| Good                                                               | 1.68          | 1.02       | 2.77        | 1.76               | 1.15       | 2.68        |
| Average to very poor                                               | 2.61          | 1.31       | 5.20        | 4.91               | 2.78       | 8.67        |
| <b>Total household size (Reference: Less than four)</b>            |               |            |             |                    |            |             |
| Four or Five                                                       | 0.69          | 0.44       | 1.07        | 0.61               | 0.35       | 1.05        |
| Six or more                                                        | 0.91          | 0.47       | 1.73        | 0.54               | 0.31       | 0.94        |
| <b>Frequency of physical activity (Reference: Every day)</b>       |               |            |             |                    |            |             |
| Never                                                              | 5.54          | 2.69       | 11.43       | 3.34               | 1.88       | 5.92        |
| 1 or 2 days a week                                                 | 1.97          | 1.15       | 3.37        | 2.05               | 1.22       | 3.47        |
| Most days a week                                                   | 1.33          | 0.81       | 2.17        | 2.08               | 1.21       | 3.58        |

**Table 4b: Odds ratios (with 95% CI) from unadjusted logistic regression models for an increase of 5 points or more on GAD-7 between pre-Covid19 and Covid-19 lockdown survey for White British and Pakistani heritage mothers.**

| Exposure                                                           | White British |            |             | Pakistani Heritage |            |             |
|--------------------------------------------------------------------|---------------|------------|-------------|--------------------|------------|-------------|
|                                                                    | Odds Ratio    | Low 95% CI | High 95% CI | Odds Ratio         | Low 95% CI | High 95% CI |
| <b>Financial security (Reference: Living comfortably)</b>          |               |            |             |                    |            |             |
| Doing alright                                                      | 1.70          | 0.97       | 3.00        | 0.93               | 0.50       | 1.74        |
| Just about getting by                                              | 2.82          | 1.53       | 5.21        | 2.55               | 1.39       | 4.68        |
| Finding it quite/ very difficult                                   | 7.69          | 3.43       | 17.26       | 4.35               | 2.27       | 8.30        |
| <b>Food security (Reference: Secure)</b>                           |               |            |             |                    |            |             |
| Insecure                                                           | 3.59          | 1.47       | 8.7         | 4.96               | 2.49       | 9.87        |
| <b>Housing security (Reference: Secure)</b>                        |               |            |             |                    |            |             |
| Insecure                                                           | 3.32          | 1.67       | 6.57        | 3.07               | 1.84       | 5.10        |
| <b>Loneliness (Reference: not lonely)</b>                          |               |            |             |                    |            |             |
| Lonely                                                             | 5.90          | 3.03       | 11.47       | 11.27              | 6.16       | 20.56       |
| <b>Social support (Reference: Easy to get support)</b>             |               |            |             |                    |            |             |
| Not Easy                                                           | 2.33          | 1.55       | 3.51        | 2.09               | 1.45       | 3.01        |
| <b>Quality of relationship with partner (Reference: Excellent)</b> |               |            |             |                    |            |             |
| Good                                                               | 1.54          | 0.93       | 2.55        | 1.88               | 1.22       | 2.89        |
| Average to very poor                                               | 4.39          | 2.26       | 8.53        | 4.99               | 2.72       | 9.14        |
| <b>Total household size (Reference: Less than four)</b>            |               |            |             |                    |            |             |
| Four or Five                                                       | 1.01          | 0.63       | 1.62        | 0.64               | 0.36       | 1.14        |
| Six or more                                                        | 1.13          | 0.58       | 2.20        | 0.61               | 0.34       | 1.07        |
| <b>Frequency of physical activity (Reference: Every day)</b>       |               |            |             |                    |            |             |
| Never                                                              | 3.90          | 1.82       | 8.36        | 2.50               | 1.40       | 4.45        |
| 1 or 2 days a week                                                 | 1.52          | 0.88       | 2.63        | 1.61               | 0.97       | 2.70        |
| Most days a week                                                   | 1.45          | 0.90       | 2.34        | 1.86               | 1.09       | 3.18        |

1  
2  
3  
4  
5  
6  
7  
8  
9  
10  
11  
12  
13  
14  
15  
16  
17  
18  
19  
20  
21  
22  
23  
24  
25  
26  
27  
28  
29  
30  
31  
32  
33  
34  
35  
36  
37  
38  
39  
40  
41  
42  
43  
44  
45  
46  
47  
48  
49  
50  
51  
52  
53  
54  
55  
56  
57  
58  
59  
60

For peer review only

1  
2  
3  
4  
5  
6  
7  
8  
9  
10  
11  
12  
13  
14  
15  
16  
17  
18  
19  
20  
21  
22  
23  
24  
25  
26  
27  
28  
29  
30  
31  
32  
33  
34  
35  
36  
37  
38  
39  
40  
41  
42  
43  
44  
45  
46  
47  
48  
49  
50  
51  
52  
53  
54  
55  
56  
57  
58  
59  
60

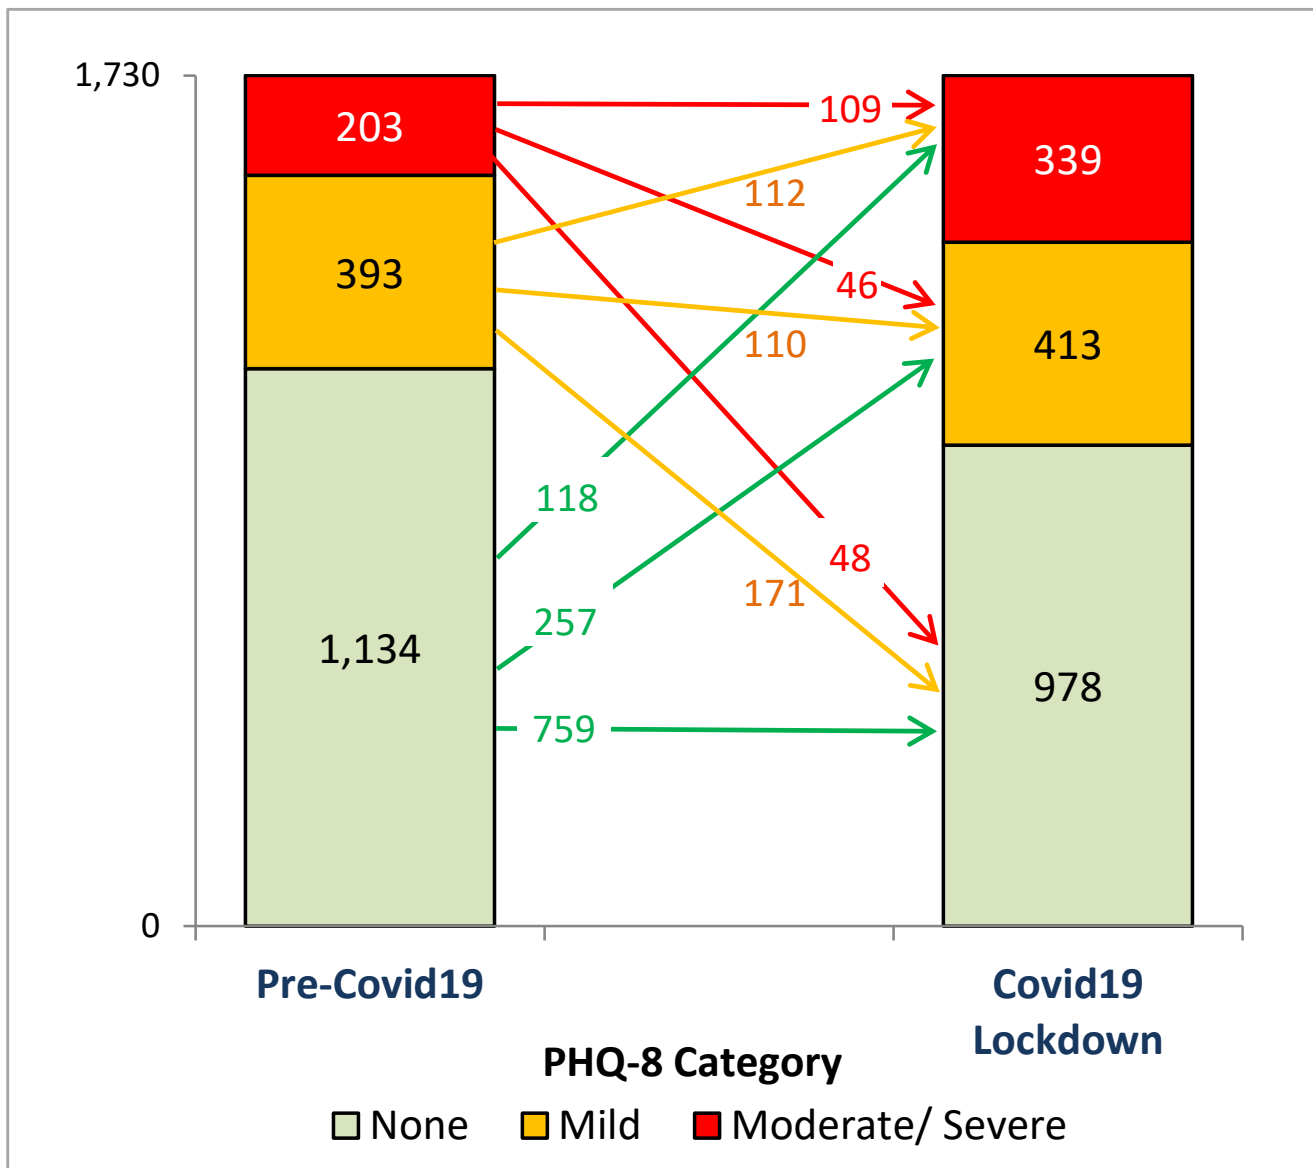

1  
2  
3  
4  
5  
6  
7  
8  
9  
10  
11  
12  
13  
14  
15  
16  
17  
18  
19  
20  
21  
22  
23  
24  
25  
26  
27  
28  
29  
30  
31  
32  
33  
34  
35  
36  
37  
38  
39  
40  
41  
42  
43  
44  
45  
46  
47  
48  
49  
50  
51  
52  
53  
54  
55  
56  
57  
58  
59  
60



Supplementary Table 1: The sample characteristics of those invited to complete the Covid-19 survey, by survey completion status.

|                          | Completed<br>survey (n=1860) | Not completed<br>survey<br>(n=4722) | Total eligible<br>(n=6866) |
|--------------------------|------------------------------|-------------------------------------|----------------------------|
| <b>Age</b>               |                              |                                     |                            |
| Under 30 yrs.            | 224 (12%)                    | 751 (16%)                           | 963 (14%)                  |
| 30 to 34 yrs.            | 396 (21%)                    | 1182 (25%)                          | 1600 (24%)                 |
| 35 to 39 yrs.            | 516 (28%)                    | 1367 (29%)                          | 1939 (29%)                 |
| 40 to 44 yrs.            | 423 (23%)                    | 892 (19%)                           | 1395 (21%)                 |
| 45 yrs. plus             | 301 (16%)                    | 495 (11%)                           | 887 (13%)                  |
| Missing                  | -                            | 35                                  | 82                         |
| <b>Ethnicity*</b>        |                              |                                     |                            |
| White British            | 613 (34%)                    | 821 (18%)                           | 1527 (23%)                 |
| Pakistani Heritage       | 877 (48%)                    | 2921 (64%)                          | 3843 (59%)                 |
| Other                    | 320 (18%)                    | 803 (18%)                           | 1148 (18%)                 |
| Missing                  | 50                           | 177                                 | 348                        |
| <b>Depression (PHQ8)</b> |                              |                                     |                            |
| None                     | 1187 (66%)                   | 2594 (64%)                          | 3774 (64%)                 |
| Mild                     | 414 (23%)                    | 945 (23%)                           | 1345 (23%)                 |
| Moderate                 | 135 (7%)                     | 346 (8%)                            | 475 (8%)                   |
| Moderately severe        | 58 (3%)                      | 134 (3%)                            | 193 (3%)                   |
| Severe                   | 19 (1%)                      | 64 (2%)                             | 83 (1%)                    |
| Missing                  | 47                           | 639                                 | 996                        |
| <b>Anxiety (GAD7)</b>    |                              |                                     |                            |
| None                     | 1280 (75%)                   | 2720 (72%)                          | 3991 (73%)                 |
| Mild                     | 270 (16%)                    | 646 (17%)                           | 908 (17%)                  |
| Moderate                 | 100 (6%)                     | 224 (6%)                            | 322 (6%)                   |
| Severe                   | 67 (4%)                      | 166 (4%)                            | 234 (4%)                   |
| Missing                  | 143                          | 966                                 | 1,411                      |

\*Note: The ethnicity representativeness is skewed by the participants in BiBGU – see reference 15 for explanation

Supplementary Table 2: Change in PhQ-8 and Gad-7 categories from Pre-Covid19 baseline to Covid-19 lockdown survey.

| Pre-Covid19 PHQ8<br>Category | PHQ8 at Covid-19 Lockdown Survey |           |                  |         | Total       |
|------------------------------|----------------------------------|-----------|------------------|---------|-------------|
|                              | None                             | Mild      | Moderate/ Severe | Missing |             |
| None                         | 759 (67%)                        | 257 (23%) | 118 (10%)        | 53      | 1187 (100%) |
| Mild                         | 171 (44%)                        | 110 (28%) | 112 (28%)        | 21      | 414 (100%)  |
| Moderate/ Severe             | 48 (24%)                         | 46 (23%)  | 109 (54%)        | 9       | 212 (100%)  |
| Missing                      | 23                               | 12        | 10               | 2       | 47 (100%)   |
| Total                        | 978                              | 413       | 339              | 85      | 1860 (100%) |

  

| Pre-Covid19 GAD7<br>Category | GAD7 at Covid-19 Lockdown Survey |           |                  |         | Total       |
|------------------------------|----------------------------------|-----------|------------------|---------|-------------|
|                              | None                             | Mild      | Moderate/ Severe | Missing |             |
| None                         | 851 (70%)                        | 247 (20%) | 118 (10%)        | 64      | 1280 (100%) |
| Mild                         | 95 (37%)                         | 91 (36%)  | 70 (27%)         | 14      | 270 (100%)  |
| Moderate/ Severe             | 47 (29%)                         | 44 (27%)  | 71 (44%)         | 5       | 167 (100%)  |
| Missing                      | 82                               | 26        | 30               | 5       | 143 (100%)  |
| Total                        | 993                              | 382       | 259              | 88      | 1860 (100%) |

*RED: category worse in lockdown compared to baseline; AMBER: category stayed the same;*

*GREEN: category improved in lockdown compared to baseline*



# BMJ Open

**“When will this end? Will it end?” The impact of the March-June 2020 UK Covid-19 lockdown response on mental health: a longitudinal survey of mothers in the Born in Bradford study.**

|                                 |                                                                                                                                                                                                                                                                                                                                                                                                                                                                                                                                                                                                                                                                                                                                                                                                                                                                                                                                                                                                                                                                                                                                                                                                                                           |
|---------------------------------|-------------------------------------------------------------------------------------------------------------------------------------------------------------------------------------------------------------------------------------------------------------------------------------------------------------------------------------------------------------------------------------------------------------------------------------------------------------------------------------------------------------------------------------------------------------------------------------------------------------------------------------------------------------------------------------------------------------------------------------------------------------------------------------------------------------------------------------------------------------------------------------------------------------------------------------------------------------------------------------------------------------------------------------------------------------------------------------------------------------------------------------------------------------------------------------------------------------------------------------------|
| Journal:                        | <i>BMJ Open</i>                                                                                                                                                                                                                                                                                                                                                                                                                                                                                                                                                                                                                                                                                                                                                                                                                                                                                                                                                                                                                                                                                                                                                                                                                           |
| Manuscript ID                   | bmjopen-2020-047748.R2                                                                                                                                                                                                                                                                                                                                                                                                                                                                                                                                                                                                                                                                                                                                                                                                                                                                                                                                                                                                                                                                                                                                                                                                                    |
| Article Type:                   | Original research                                                                                                                                                                                                                                                                                                                                                                                                                                                                                                                                                                                                                                                                                                                                                                                                                                                                                                                                                                                                                                                                                                                                                                                                                         |
| Date Submitted by the Author:   | 11-Oct-2021                                                                                                                                                                                                                                                                                                                                                                                                                                                                                                                                                                                                                                                                                                                                                                                                                                                                                                                                                                                                                                                                                                                                                                                                                               |
| Complete List of Authors:       | Dickerson, Josie; Bradford Institute for Health Research<br>Kelly, Brian; Bradford Institute for Health Research<br>Lockyer, Bridget; Bradford Institute for Health Research<br>Bridges, Sally; Bradford Institute for Health Research<br>Cartwright, Christopher; Bradford Institute for Health Research<br>Willan, Kathryn ; Bradford Institute for Health Research<br>Shire, Katy; Bradford Institute for Health Research<br>Crossley, Kirsty; Bradford Institute for Health Research<br>Bryant, Maria; University of York, Health Sciences<br>Siddiqi, Najma; University of York, Health Sciences; Hull York Medical School<br>Sheldon, T; Bradford Institute for Health Research; Queen Mary University of London Barts and The London School of Medicine and Dentistry, Institute of Population Health Sciences<br>Lawlor, Deborah; MRC Integrative Epidemiology Unit, MRC Integrative Epidemiology Unit at The University of Bristol; University of Bristol Medical School, Population Health Science<br>Wright, John; Bradford Institute for Health Research<br>McEachan, Rosemary; Bradford Institute for Health Research; University of Bradford Faculty of Life Sciences<br>Pickett, Kate; University of York, Health Sciences |
| <b>Primary Subject Heading</b>: | Public health                                                                                                                                                                                                                                                                                                                                                                                                                                                                                                                                                                                                                                                                                                                                                                                                                                                                                                                                                                                                                                                                                                                                                                                                                             |
| Secondary Subject Heading:      | Mental health, Public health                                                                                                                                                                                                                                                                                                                                                                                                                                                                                                                                                                                                                                                                                                                                                                                                                                                                                                                                                                                                                                                                                                                                                                                                              |
| Keywords:                       | COVID-19, MENTAL HEALTH, Depression & mood disorders < PSYCHIATRY, Anxiety disorders < PSYCHIATRY, PUBLIC HEALTH                                                                                                                                                                                                                                                                                                                                                                                                                                                                                                                                                                                                                                                                                                                                                                                                                                                                                                                                                                                                                                                                                                                          |
|                                 |                                                                                                                                                                                                                                                                                                                                                                                                                                                                                                                                                                                                                                                                                                                                                                                                                                                                                                                                                                                                                                                                                                                                                                                                                                           |

SCHOLARONE™  
Manuscripts



I, the Submitting Author has the right to grant and does grant on behalf of all authors of the Work (as defined in the below author licence), an exclusive licence and/or a non-exclusive licence for contributions from authors who are: i) UK Crown employees; ii) where BMJ has agreed a CC-BY licence shall apply, and/or iii) in accordance with the terms applicable for US Federal Government officers or employees acting as part of their official duties; on a worldwide, perpetual, irrevocable, royalty-free basis to BMJ Publishing Group Ltd ("BMJ") its licensees and where the relevant Journal is co-owned by BMJ to the co-owners of the Journal, to publish the Work in this journal and any other BMJ products and to exploit all rights, as set out in our [licence](#).

The Submitting Author accepts and understands that any supply made under these terms is made by BMJ to the Submitting Author unless you are acting as an employee on behalf of your employer or a postgraduate student of an affiliated institution which is paying any applicable article publishing charge ("APC") for Open Access articles. Where the Submitting Author wishes to make the Work available on an Open Access basis (and intends to pay the relevant APC), the terms of reuse of such Open Access shall be governed by a Creative Commons licence – details of these licences and which [Creative Commons](#) licence will apply to this Work are set out in our licence referred to above.

Other than as permitted in any relevant BMJ Author's Self Archiving Policies, I confirm this Work has not been accepted for publication elsewhere, is not being considered for publication elsewhere and does not duplicate material already published. I confirm all authors consent to publication of this Work and authorise the granting of this licence.

1 **“When will this end? Will it end?” The impact of the March-June 2020 UK Covid-19 lockdown**  
2 **response on mental health: a longitudinal survey of mothers in the Born in Bradford study.**  
3  
4

5 Josie Dickerson<sup>1</sup>, Brian Kelly<sup>1</sup>, Bridget Lockyer<sup>1</sup>, Sally Bridges<sup>1</sup>, Christopher Cartwright<sup>1</sup>, Kathryn Willan<sup>1</sup>,  
6 Katy Shire<sup>1</sup>, Kirsty Crossley<sup>1</sup>, Maria Bryant<sup>1,2</sup>, Najma Siddiqi<sup>3</sup>, Trevor A Sheldon<sup>1,4</sup>, Deborah A Lawlor<sup>5,6,7</sup>,  
7 John Wright<sup>1</sup>, Rosemary RC McEachan<sup>1,8</sup>, Kate E Pickett<sup>1,2</sup> on behalf of the Bradford Institute for Health  
8 Research Covid-19 Scientific Advisory Group (<https://www.bradfordresearch.nhs.uk/c-sag/>).  
9

10  
11  
12 Corresponding author:

13 Josie Dickerson, Bradford Institute for Health Research, Bradford Teaching Hospitals NHS Foundation  
14 Trust, Bradford Royal Infirmary, Duckworth Lane, Bradford, BD9 6RJ, UK.

15 Email: [josie.dickerson@bthft.nhs.uk](mailto:josie.dickerson@bthft.nhs.uk)

16 Telephone: 01274 383916  
17  
18  
19

20  
21 **Addresses**

22 <sup>1</sup> Bradford Institute for Health Research, Bradford Teaching Hospitals NHS Foundation Trust, Bradford  
23 Royal Infirmary, Duckworth Lane, Bradford, UK.

24 <sup>2</sup> Department of Health Sciences, University of York, Department of Health Sciences, Seebohm Rowntree  
25 Building, University of York, Heslington, York, UK.

26 <sup>3</sup> The Hull York Medical School, University of York, Heslington York, UK

27 <sup>4</sup> Institute of Population Health Sciences, Barts and The London School of Medicine and Dentistry, Queen  
28 Mary University London, Yvonne Carter Building, 58 Turner Street, London, UK

29 <sup>5</sup> MRC Integrative Epidemiology Unit at the University of Bristol, Oakfield House, Oakfield Grove, Bristol, ,  
30 UK

31 <sup>6</sup> Population Health Science, Bristol Medical School, University of Bristol, UK

32 <sup>7</sup> Bristol National Institute for Health Research Biomedical Research Centre, UK

33 <sup>8</sup> Faculty of Life Sciences and Health Studies, University of Bradford, Richmond Rd, Bradford, UK  
34  
35  
36  
37  
38

39 **KEYWORDS**

40 Covid-19; mental health; depression; anxiety; health inequalities; ethnic minorities  
41  
42

43 **WORD COUNT:** 5,231  
44  
45  
46  
47  
48  
49  
50  
51  
52  
53  
54  
55  
56  
57  
58  
59  
60

## ABSTRACT

**Objectives** To explore clinically important increases in depression/anxiety from before to during the first UK Covid-19 lockdown and factors related to this change, with a particular focus on ethnic differences.

**Design** Pre-Covid-19 and lockdown surveys nested within two longitudinal Born in Bradford cohort studies.

**Participants** 1,860 mothers with a child aged 0-5 or 9-13, 48% Pakistani heritage

**Main outcome measures** Odds ratios (OR) for a clinically important increase (5 points or more) in depression (PHQ-8) and anxiety (GAD-7) in unadjusted regression analyses, repeated with exposures of interest separated by ethnicity to look for differences in magnitude of associations, and lived experience of mothers captured in open text questions.

**Results** The number of women reporting clinically important depression/anxiety increased from 11% to 20% [10-13%;18-22%] and 10% to 16% [8-11%; 15-18%] respectively. Increases in depression/anxiety were associated with: loneliness (OR: 8.37, [5.70-12.27]; 8.50, [5.71-12.65] respectively); financial (6.23, [3.96-9.80]; 6.03, [3.82-9.51]); food (3.33 [2.09-5.28]; 3.46 [2.15-5.58]); and housing insecurity (3.29 [2.36-4.58]; 3.0 [2.11-4.25]); a lack of physical activity (3.13 [2.15-4.56]; 2.55 [1.72-3.78]); and a poor partner relationship (3.6 [2.44-5.43]; 5.1 [3.37-7.62]). The magnitude of associations between key exposures and worsening mental health varied between ethnic groups.

Responses to open text questions illustrated a complex inter-play of challenges contributing to mental ill health including: acute health anxieties; the mental load of managing multiple responsibilities; loss of social support and coping strategies; pressures of financial and employment insecurity; and being unable to switch off from the pandemic.

**Conclusions** Mental ill health has worsened for many during the Covid-19 lockdown, particularly in those who are lonely and economically insecure. The magnitude of associations between key exposures and worsening mental health varied between ethnic groups. Mental health problems may have longer term consequences for public health and interventions that address the potential causes are needed.

## STRENGTHS AND LIMITATIONS OF THIS STUDY

- Three key longitudinal studies have highlighted that the Covid-19 pandemic and lockdowns have had a negative impact on mental health, particular in younger adults, women and those from low socio-economic circumstances, but with participants of predominantly White European ethnicity.
- The Born in Bradford research programme offers a unique opportunity to investigate the impact of Covid-19 lockdown on mental health in a deprived and ethnically diverse population in whom mental ill health is often reported to be more prevalent.
- This is a longitudinal study containing linked data collected before the Covid-19 pandemic and during the March-June 2020 lockdown which has allowed us to explore change over that time period in a highly ethnically diverse population, the majority of whom live in the most deprived centiles in the UK.
- Respondents in this study were mothers of children aged 0-5 and/or 9-13 which may limit the wider generalisability, though our findings are broadly similar (in prevalence and associations) to those from another longitudinal study that included adult men and women.
- We are not aware of other studies that have explored longitudinal change in mental health from before to during the Covid-19 lockdown in a similar ethnically diverse and deprived population.

## Introduction

There is growing concern that the 'lockdown' measures to control the spread of the Covid-19 pandemic<sup>1,2</sup> have had unintended consequences including an increase in mental ill health. Several studies since the Covid-19 pandemic began have reported high levels of depression and anxiety<sup>3-7</sup> in the UK. However, some of these surveys are either cross-sectional or longitudinal *within* the lockdown period<sup>6-7</sup> with only three studies<sup>3,4,5</sup> comparing mental health in the pre-Covid-19 period to mental health during the Covid-19 lockdown. These studies consistently found worsening mental health in younger adults and those who were financially insecure. Other associations were reported in those who: had a disability<sup>3</sup>; pre-existing mental and physical health conditions<sup>4</sup>; were living alone<sup>4</sup>; in parents of young children<sup>5</sup>; and in women<sup>4,5</sup>.

In these studies, most participants were of white European origin and the larger of the studies was in a relatively affluent population<sup>4</sup>. Mental ill health is often reported as being more prevalent in people from ethnic minorities and the socially and economically disadvantaged<sup>8,9</sup>, but no longitudinal research to date has investigated the impact of Covid-19 lockdown on mental health in these populations<sup>10</sup>.

We were able to explore these questions in depth by building on the Born in Bradford research programme which includes two longitudinal birth cohorts of ethnically diverse families living in the city of Bradford, many in deprived circumstances. These cohorts have recent in-depth information on the demographics, socioeconomic status and mental health of mothers before the Covid-19 pandemic,<sup>11-13</sup> as well as mental health during the March-June 2020 Covid-19 lockdown<sup>14</sup>, and so offer a unique opportunity to assess the impact of Covid-19 and lockdown longitudinally in a deprived and ethnically diverse population.

We used the data to:

- Describe the changes in the prevalence of depression and anxiety in mothers living in Bradford from before the Covid-19 pandemic to during the March-June 2020 Covid-19 lockdown.
  - Identify variables associated with a clinically important increase in mental ill health in this population, to identify vulnerable groups that may need additional support in the recovery from the pandemic.
  - Explore whether there is a difference in the magnitude of the associations of key exposures with an increase in clinically important mental ill health by ethnicity (Pakistani heritage compared to White British ethnicity).
  - To explore mothers' lived experience during the March-June 2020 Covid-19 lockdown by assessing the frequency of worries and concerns relating to mental ill health obtained through free text responses to open questions.

## Methods

### *Study Design*

A longitudinal study using data collected at two time points, before and during the March-June 2020 Covid-19 lockdown, from mothers who participated in one of two prospective birth cohort studies in Bradford: Born in Bradford's Growing Up (BiBGU) study, with parents of children currently aged 9-13<sup>11,12</sup> and Born in Bradford's Better Start (BiBBS), with parents of children currently aged 0-5.<sup>13</sup>

### *Patient and Public Involvement*

Born in Bradford is a 'people powered' research study; the local community were consulted to identify key research priorities during the March-June 2020 Covid-19 lockdown. This included consultation with key community groups, seldom-heard communities and local policy and decision makers to ensure that the focus of the research was relevant to local needs. The Covid-19 survey and recruitment approach were tested through our established research advisory groups. The findings of the study were also shared with these groups to enhance interpretation and ensure useful dissemination back to the community<sup>14</sup>.

### *Consent*

1 Participants had previously consented for their research data, and routinely collected health and education  
2 data, to be used for research. For the Covid-19 survey, verbal consent was taken for questionnaires  
3 completed over the phone and implied consent was assumed for all questionnaires completed via post or  
4 online.  
5

### 6 *Data Collection*

9 Full details of the data collection of the March-June 2020 Covid-19 survey can be found elsewhere<sup>14,15</sup>. In  
10 summary:

11 Participants were recruited using a combination of emails, text and phone with a follow-up postal survey,  
12 and in their main language wherever possible.

#### 14 *a) Pre-Covid-19 data*

16 Pre-Covid-19 data for BiBGU participants were derived from two sources: a) participant ethnicity and age  
17 were collected during pregnancy (2007-2011);<sup>11</sup> b) recent follow-up data on mental health (collected  
18 between 24<sup>th</sup> June 2017 and 12<sup>th</sup> March 2020).<sup>12</sup> Pre-Covid-19 data for BiBBS participants were taken from  
19 data collected during pregnancy (6<sup>th</sup> January 2016 and 8<sup>th</sup> February 2020).<sup>13</sup> The median time since most  
20 recent pre-Covid-19 data collection was 15 months (range 1 to 35) for BiBGU and 29 months (range 2 to  
21 52) for BiBBS.  
22

#### 24 *b) March-June 2020 Covid-19 lockdown data collection:*

26 Mental health was measured using the PHQ-8<sup>16</sup> for depression and the GAD-7 for anxiety.<sup>17</sup> These are  
27 widely used measures of the severity of symptoms of depression and anxiety that have been validated in  
28 the general population,<sup>16,17</sup> and in many ethnic minorities including UK residents of Pakistani heritage.<sup>18</sup>  
29 Information was also collected on: household circumstances; family relationships; social support and  
30 loneliness; financial, employment, housing and food insecurity; physical health. This contextual information  
31 was captured in self-reported questions administered in the Covid-19 lockdown survey; details of variables  
32 used are in Table 1 and our protocol paper<sup>14</sup>. Information on the participants' lived experience during  
33 lockdown were captured using free text questions that asked "what are your three biggest worries at the  
34 moment?" and "has anything been easier or more enjoyable in lockdown?"  
35

### 37 *Data Preparation*

39 To describe the changes in prevalence of depression and anxiety from before the Covid-19 pandemic to  
40 during the Covid-19 lockdown we derived a categorical variable for each PHQ-8 and GAD-7 score based  
41 on the standard clinical scoring classification: 0 to 4 no depression, 5 to 9 mild depression, 10-24  
42 moderate-severe depression; 0 to 4 no anxiety, 5 to 9 mild anxiety, 10 to 21 moderate-severe anxiety.<sup>16,17</sup>  
43 and then collapsed moderate, moderately severe and severe categories to indicate clinically important  
44 symptoms of depression and anxiety. To identify variables associated with an increase of mental ill health  
45 we used an increase in PHQ-8 and GAD-7 scores of 5 or more points as an indicator of clinically important  
46 change in symptoms. This cut-off was chosen following guidance from previous research and consultation  
47 with clinical colleagues<sup>19</sup>. An increase of five points or more would also always result in a change in the  
48 categorisation of symptoms (e.g. from none to mild or mild to moderate/severe) whilst also capturing  
49 changes in severity within the moderate/severe categories.  
50

51 Ethnicity was coded using Census 2011 categories and also as 'White British', 'Pakistani Heritage' and  
52 'Other', which included all other groups due to small numbers of a wide range of ethnicities. Given the  
53 heterogeneity of the 'Other' ethnic group, the decision was made to not use this group in these analyses,  
54 but to focus on comparing those of Pakistani heritage and White British ethnicity.  
55

56 A number of categories within other explanatory variables were collapsed for analysis. These included:  
57 Quality of relationship with partner: Average to poor (comprising of 'average', 'poor' and 'very poor');  
58 Loneliness: Not lonely (comprising of: 'none or almost none of the time' and 'some of the time') and Lonely  
59 (comprising of: 'Most of the time' and 'All or almost all of the time'); Social support: Easy to get support  
60 (comprising of: 'Very easy' and 'easy'); and Not easy to get support (comprising of: 'Very difficult', 'Difficult'



and 'Possible'); Food insecurity: Secure (Comprising of 'never true' or 'sometimes true' that food didn't last) and Insecure (Comprising of 'Often true' that food didn't last). Housing security: Secure (Comprising: 'Strongly Disagree', 'Disagree' and 'Neither disagree or agree' that I worry about being evicted or having my home repossessed) and Insecure (comprising of 'Strongly Agree' or 'Agree').

Missing data on measures was small for most variables (Table 1) and was not adjusted for in the analyses.

### *Data analysis*

To describe the changes in the prevalence of depression and anxiety from before to during the pandemic we explored the changes in PHQ-8 and GAD-7 categories using descriptive statistics and presented these visually to elucidate the patterns of both positive and negative changes.

We used descriptive statistics to present results of sample characteristics, including depression and anxiety scores at pre-Covid-19 and Covid-19 lockdown survey time points.

We then modelled the odds ratios associated with an increase in PHQ-8 and GAD-7 scores by five or more points using separate unadjusted logistic regression models for each exposure variable of interest. Exposure variables included in the analyses were identified as indicative of an increase in mental ill-health in the lockdown survey findings reported previously.<sup>15</sup> Pre-Covid-19 PHQ-8 and GAD-7 scores were controlled for in each model.

In order to explore whether or not the magnitude of the association between exposure variables and a clinically important increase in symptoms of depression and anxiety differed between ethnic groups, we repeated the above analyses for Pakistani heritage and White British participants separately. This approach avoids the difficulties inherent in interpreting the ethnicity coefficient in regression models controlling for other variables<sup>20</sup>. All statistical analyses were carried out using Stata 15.<sup>21</sup>

To explore mothers' lived experience during the March-June 2020 Covid-19 lockdown, the free text responses to open questions were reviewed and themes that related to mental health of the mothers were pulled out. Responses were coded using thematic analysis<sup>22</sup>. The first 100 responses were analysed by one researcher (BL), employing an inductive approach where coding and theme development were driven by the content of the responses. Two codebooks were developed, one for the questions on the three biggest worries and recent challenges during lockdown and another smaller codebook for the question on what had been made more enjoyable and easier during lockdown. Using Microsoft Excel, the remaining responses were then coded by three different researchers in order to test the strength and validity of the codebooks. Through frequent discussion between the researchers about this process, adjustments were made to the original codebooks so that they were reflective of the total responses. The emergent themes relating to mental health were used to illuminate the findings from the quantitative analyses.

### *Ethics*

This study was approved by the HRA and Bradford/Leeds research ethics committee (Substantial amendments to: BiBGU 16/YH/0320 and BiBBS 15/YH/0455)

## **Results**

### *Study Population*

2,144 (28%) of those invited participated in the Covid-19 survey between 10<sup>th</sup> April and 30<sup>th</sup> June 2020. Full details of the study population are described elsewhere and demonstrate that the population are broadly representative of the BiBGU and BiBBS cohorts<sup>15</sup>. Of these 2,144 mothers, 1,860 (87%) had complete surveys and linked data from pre-Covid-19 surveys and were used for this study. Of these participants, 1,316 (71%) were in the BiBGU cohort (with a child aged 9-13) and 544 (29%) were in the BiBBS cohort (with a child aged 0-5) and had a mean age of 37.5 years (SD 6.8). Participants were ethnically diverse: 877 (48%) were of Pakistani heritage, 613 (34%) White British and 320 (18%) other ethnic groups; 1,211 (65%) lived in the most deprived quintile of material deprivation in England. Table 1 describes the sample characteristics of the study population. Respondents were representative of the invited cohort on baseline

(i.e. prior to the Covid-19 pandemic) levels of depression and anxiety. Ethnicity was skewed with more White British and less Pakistani heritage respondents than in the invited sample, although the study sample still offers a large ethnically diverse population (see Supplementary Table 1).

[Table 1 here]

#### *Study Sample Change in Prevalence of Depression and Anxiety (n=1860)*

The prevalence of moderate / severe depression increased between the pre-Covid-19 and Covid-19 lockdown surveys (n=1860) from 11% (n=212 [95% Confidence Intervals 10-13%]) to 20% (n=349 [18-22%]). The proportion of mothers reporting mild symptoms of depression remained similar; while the proportion of those with no depressive symptoms decreased from 65% (n=1187 [63-68%]) to 56% (n=1001 [54-59%]), (Table 2). The proportion of mothers with moderate/severe anxiety increased from 10% (n=167 [8-11%]) to 16% (n=289 [15-18%]). The prevalence of mild anxiety also increased from 16% (n=270 [14-18%]) to 23% (n=408 [21-25%]), whilst the proportion of participants with no anxiety fell from 75% (n=1280 [72-77%]) to 61% (n=1075 [58-63%]) (Table 2).

[Table 2 here]

#### *Within-Mothers Change in Depression (n=1760) and Anxiety (n=1634)*

1,760 participants had both pre-Covid-19 and Covid-19 lockdown depression data and 1634 had pre-Covid-19 and Covid-19 lockdown anxiety data. Table 3 shows the change in depression and anxiety categorisations for these mothers across the two time points 2 (see also Supplementary Figure 1 & 2). The majority of mothers stayed in the same depression and anxiety categories across the two time points, for example 67% (n=759) who had no symptoms in the pre-Covid-19 data continued to have no symptoms during lockdown; and 54% (n=109) of those who had moderate/severe symptoms before the pandemic, remained in this category in the lockdown survey). However, many mothers' mental health worsened, with 38% (n=230) who had no/mild symptoms pre-Covid-19 reporting moderate/severe symptoms in the lockdown survey. A smaller number of mothers' mental health improved: of those mothers with moderate/severe symptoms pre-Covid-19, 24% (n=48) subsequently reported no symptoms and 23% (n=46) reported mild depression in the Covid-19 survey. Similar patterns of change were seen with the anxiety categories.

#### *Factors associated with a clinically important increase in Depression (n=1760) and Anxiety (n=1634)*

367 (21%) of mothers reported a clinically important increase (5 or more points) in depressive symptoms, and 348 (21%) reported a clinically important increase (5 or more points) in anxiety symptoms.

Table 4 presents the odds ratios for a clinically important increase in PHQ-8 and GAD-7 scores in relation to each exposure variable from the unadjusted logistic regression models. The estimates resulting from these models are imprecise, with wide confidence intervals.

Financial, food and housing insecurity during lockdown were associated with a higher likelihood of a clinically important increase in both depression and anxiety symptoms: the odds were more than 6 times greater for women who were financially insecure (Odds Ratio (OR) 6.23 [3.96-9.8] for depression; OR 6.03 [3.82-9.51] for anxiety) and over 3 times greater in mothers who were food insecure (OR 3.33 [2.09-5.28] for depression; OR 3.46 [2.15-5.58] for anxiety) or housing insecure (OR 3.29 [2.36-4.58] for depression; OR 3.0 [2.11-4.25] for anxiety).

Social circumstances were also associated with an increase in depression and anxiety: The odds of increased depression or anxiety were more than eight times greater in mothers reporting loneliness (OR 8.37 [5.7-12.27] for depression; OR 8.5 [5.71-12.65] for anxiety), and a lack of social support doubled the likelihood of an increase in depression and anxiety (OR 2.25 [1.78-2.86]; OR 2.13 [1.67-2.73] respectively). An average / poor relationship increased the odds of experiencing symptoms of depression by 3.6 [2.44-



5.43] and of anxiety by 5.1 [3.37-7.62]. A larger household size reduced the OR for depressive symptoms (OR 0.73 [0.53-0.99]), but not for anxiety (OR 0.90 [0.63-1.29]).

A lack of physical activity during lockdown was associated with an increased OR for both depression and anxiety (OR 3.13 [2.15-4.56]; OR 2.55 [1.72-3.78], respectively). Mothers who did the same amount of physical activity during lockdown as they had done pre-Covid-19 reduced the odds of an increase in depressive symptoms by 34% (OR 0.66 [0.45-0.97]).

[Table 4 here]

There was no clear association between ethnicity (Pakistani heritage compared to White British) and an increase in depression (OR 0.88 [0.68-1.15]) or anxiety (OR 0.94: [0.72-1.23]). When the unadjusted regression analysis was repeated separately for White British and Pakistani heritage mothers, interesting differences in the magnitude of the association between exposure variables and a clinically important increase in symptoms of depression and anxiety was found, although confidence intervals are wide (Table 5a and 5b). The odds of an increase in depression and anxiety were greater for Pakistani heritage women who reported loneliness (OR 11.22 [6.45-19.53] for depression and OR 11.27 [6.16-20.56] for anxiety) compared to White British mothers (OR 7.17 [3.66-14.01] and OR 5.90 [3.03-11.47] respectively). There was also a greater magnitude of association for increased depression, but not anxiety, for Pakistani heritage women who reported an average / poor relationship with their partner (OR 4.91 [2.78-8.67] for depression and OR 4.99 [2.72-9.14] for anxiety), compared to White British mothers (OR 2.61 [1.31-5.20] and OR 4.39 [2.26-8.53] respectively).

In contrast the magnitude of the odds of an increase in depression and anxiety was greater for White British women who reported financial insecurity (OR 12.14 [5.15-28.60] for depression and OR 7.69 [3.43-17.26] for anxiety) or never doing physical activity (OR 5.54 [2.69-11.43] and OR 3.90 [1.82-8.36] respectively) compared to Pakistani heritage women (financial insecurity: OR 5.79 [2.90-11.56] for depression and OR 4.35 [2.27-8.30] for anxiety); (physical activity: OR 3.34 [1.88-5.92] and OR 2.50 [1.40-4.45] respectively).

For Pakistani heritage mothers living in large households, the odds of an increase in depression was reduced (OR 0.54 [0.31-0.94]) compared to White British mothers for whom there was no association (OR 0.91 [0.47-1.73]). There were no clear associations between ethnicity and household size for anxiety (OR 0.61 [0.34-1.07] and OR 1.13 [0.58-2.20]).

[Table 5 here]

Free text responses to the question "what are your three biggest worries at the moment" were available for 1799 mothers. Only a small proportion of women identified their mental health issues as one of their biggest worries, n=105 (6%, 95%CI: 5%-7%), slightly greater in White British mothers, n=51 (8%, 95%CI: 6%-11%) than in mothers of Pakistani heritage, n=32 (4%, 95%CI: 3%-5%). More often, mothers reported how wider issues and concerns impacted on their mental health and wellbeing:

**Health anxieties about Covid-19:** the most commonly reported worry was a fear of bringing the virus home (e.g. from the shops or from their places of work), and themselves or members of their family becoming ill or dying, as well as the fear of what would happen to their children if this did happen to them.

*I worry about contracting coronavirus particularly whilst at work and either becoming critically myself unwell or bringing it home to my family*

*Feeling anxious about the virus and constantly worrying about my kids which 2 of them have health issues and are quite vulnerable*

*I feel particularly anxious to even step out of the house even for food shopping or taking a walk/exercise*

*I worry how this will affect my children. I'm terrified they will be separated as I have 2 children with my ex-husband and one with my current. So I haven't been outside in 10 weeks.*

1 **Mental load:** mothers often reported the mental load of managing work, home-schooling, childcare and  
2 domestic tasks, without the break provided by children attending school, nursery or other childcare. Being  
3 or feeling stuck inside and unable to move around freely contributed to a sense of suffocation and feeling  
4 overwhelmed, and many mothers acknowledged that this was having a detrimental effect on their mental  
5 health and self-esteem:  
6

7 *I'm worried [about] having a nervous breakdown or a panic attack...can't get a break from all the*  
8 *responsibilities and go somewhere for fresh air even*

9 *Finding working from home and looking after children very demanding. No time alone. No silence.*  
10 *Surrounded by people and electronics all my waking hours.*

11 *I am a keyworker who works five days of week, only while my children are at school. I am becoming*  
12 *mentally drained/exhausted constantly being on duty, it is impacting my mental health.*

13 *Homeschooling I am not cut out for this and don't feel good enough*

14  
15  
16  
17 **Loss of social support:** The loss of social support caused by lockdown, especially for those who didn't live  
18 with their partner or were single parents was highlighted as causing loneliness and isolation for some.

19 *My support network was my partner, who I cannot see due to lockdown.*

20 *Not able to see my boyfriend - feel isolated and alone once children are in bed with no adult face to face*  
21 *interaction*

22 *The isolation and loneliness has been a challenge and having to take care of my child on my own full-time*

23 *Being a single parent of a disabled child I rely on my social life/friends for my mental wellbeing and I worry*  
24 *about when it'll be safe to see/hug my immediate family who live locally*

25 **Financial and employment insecurity:** Household finances and the stress of unemployment or job  
26 insecurity related to lockdown measures were also a major worry for women. Many families were in debt,  
27 reliant on credit cards and benefits, and in insecure employment before the lockdown measures began and  
28 were only just about getting by prior to the pandemic.

29 *I have struggled financially during this time. I would like to not worry about money and bills and shopping*  
30 *and outgoings. I have enough worries being a full time carer.*

31  
32  
33  
34  
35  
36 *Worried about the financial impact of covid 19. I am currently furloughed from work but I worry that the virus*  
37 *will have an impact on the business. My husband is self-employed and is not eligible to any funds.*

38  
39 **Being unable to switch off:** Participants described being frightened of the news reports but unable to  
40 switch off, and were wondering when, if ever, things would become normal again:

41 *Worry about my mental health, I know I'm struggling. Worry about the future and how this will affect the*  
42 *country financially. Worry about my children's education & what they've missed out on.*

43 *All the bad news on the TV, and the death rate on the News. All the information on the news makes me*  
44 *panic more.*

45 *When will this end? Will it end?*

46  
47  
48  
49 **A loss of coping strategies:** For those who had existing mental health issues before lockdown, the  
50 lockdown measures had often taken away their sources of support, their normal routines and methods of  
51 coping. In addition, some respondents reported being unable to access mental health services due to  
52 Covid-19 and lockdown measures:  
53

54 *Mental health - Exercise at the gym was a coping mechanism, now closed. Can do bits at home but nothing*  
55 *like at the gym. Cannot get any gym equipment - out of stock.*

56 *Mental Health - struggling to motivate myself and to keep to a routine. Self-destructive behaviour - drink*  
57 *drugs and binge eating. I am missing my work and colleagues.*

1 *Not getting my mental health support since the lockdown. My CPN (Community Psychiatric Nurse) not*  
 2 *returning my calls. It has made me a lot worse. I try to talk to my husband so I am not keeping everything*  
 3 *inside*

4  
 5 *Mental health, I have had previous issues in the past and am struggling and don't feel like I can approach*  
 6 *my GP at the minute as it isn't an emergency*

7  
 8 **Positive aspects of lockdown:** Many participants reported positive aspects to changes enforced by the  
 9 lockdown, commenting that they were getting to spend more quality time with their children, were enjoying  
 10 a slower pace of life, a more relaxed routine and spending less time driving and commuting.

11  
 12 *Life has become a lot more relaxed over the last 3 weeks, no manic mornings trying to get everybody out of*  
 13 *the house, time with kids, doing stuff with kids I would normally say 'not now' to. Get to know kids more.*  
 14 *More time outside, [doing] jobs in the house that need doing.*

15  
 16 *Spending more time with my husband and feeling appreciative of each other and having a relaxed day with*  
 17 *the children instead of running to school to mosque and then all the extra clubs it's a more relaxed day.*

18  
 19 *Ramadan is the easiest it has ever been, we are free to make up our sleep and not push ourselves too*  
 20 *much, had time to do nice things during Ramadan including having a more peaceful time not having to do*  
 21 *school runs, be stressed out, my husband had a chance to take a slower pace to life and not get too*  
 22 *stressed.*

## 23 24 25 **DISCUSSION**

26 We compared depression and anxiety during the March-June 2020 UK lockdown to pre-Covid-19  
 27 depression and anxiety data collected in our longitudinal birth cohort studies. We found that clinically  
 28 important symptoms of depression and anxiety increased from 11% to 20% and from 11% to 16%,  
 29 respectively. These findings reflect those of other longitudinal studies which have reported similar changes  
 30 in mental health from before to during the Covid-19 pandemic<sup>3,4,5</sup>.

31  
 32 We hypothesised that our vulnerable population with diverse ethnicity and high levels of deprivation would  
 33 be susceptible to increases in depression and anxiety during the lockdown. Financial, food and housing  
 34 insecurity all increased the odds of an increase in depression and anxiety, as did loneliness, a lack of social  
 35 support, an average/poor partner relationship and a lack of physical activity.

36  
 37 There was no clear association between White British and Pakistani heritage mothers and a clinically  
 38 important increase in depression or anxiety. However, when we separated out the regression analyses by  
 39 ethnicity, we found interesting differences in the magnitude of the associations with an increase in  
 40 depression and anxiety: Mothers from a Pakistani heritage had greater odds of an increase in depression  
 41 and anxiety if they were lonely or had an average/poor relationship (for depression, but not anxiety) than  
 42 White British mothers. Pakistani heritage mothers had a much reduced odds of an increase in depression  
 43 if they lived in a large household compared to White British mothers (for whom there was no association).  
 44 In contrast, mothers of White British ethnicity had greater odds of an increase if they were financially  
 45 insecure and/or physically inactive compared to Pakistani heritage mothers reporting the same exposures.

46  
 47 The free text responses supported these findings, highlighting a complex inter-play of challenges  
 48 contributing to poor mental health in mothers including: acute health anxieties; the mental load of managing  
 49 multiple roles and responsibilities; the loss of social support and other coping strategies; pressures of  
 50 financial and employment insecurity; and being unable to switch off from the pandemic.

51  
 52 The potential ethnic differences in the magnitude of the associations of different variables and increased  
 53 mental ill health reported in this study warrant further investigation, including an understanding of potentially  
 54 differing protective factors in different ethnic groups. We have previously reported, outside of the Covid-19  
 55 context, that (a) White British mothers are more likely to have their mental ill health identified by health  
 56 professionals than South Asian mothers, and that (b) both White British and South Asian mothers are  
 57 equally likely to disclose symptoms in self-report research questionnaires, as used here.<sup>23,24</sup> Ethnic  
 58 differences in household structure, and cultural practices might provide more support in times of adversity,  
 59 as we have found in the case of food insecurity previously<sup>25,26</sup>.

1 This is a longitudinal study comparing data collected before the Covid-19 pandemic and during the March-  
2 June 2020 lockdown which has allowed us to explore change over that time period. It also provides findings  
3 from a highly ethnically diverse population, the majority of whom live in the most deprived centiles in the  
4 UK. We are not aware of other studies that have explored longitudinal change in mental health from pre- to  
5 during- the Covid-19 lockdown in a similar population.  
6

7 Respondents were mothers of children aged 0-5 and/or 9-13 which may limit the wider generalizability,  
8 though our findings are broadly similar to those from a previous longitudinal study of two UK cohorts that  
9 included adult men and women (not all of whom were mothers), and found the increased risk of poor  
10 mental health in lockdown to be greater in women<sup>4</sup>. Our pre-Covid-19 measures were taken from data  
11 collected over the past 4 years, so we cannot, with confidence, attribute all changes to the pandemic and  
12 the lockdown. For example, it is possible that some of the difference reflects age related change in the  
13 women and/or their children over time. It is also possible that we have underestimated some of the adverse  
14 impact of lockdown as a significant percentage of the BiBBS participants were pregnant at baseline, which  
15 itself is associated with raised levels of mental ill health. However our analysis did not find increased levels  
16 of depression and anxiety for the BiBBS cohort compared to the BiBGU cohort. Similarly, our analyses did  
17 not find any association between time since baseline data capture and the odds of an increase in  
18 depression and anxiety, suggesting that the timing of our baseline collection is not influencing our findings...

19 We undertook unadjusted logistic regression analyses to explore possible factors that might explain or  
20 influence changes in mental health from before- to during- the pandemic, and repeated these separating  
21 out the two main ethnic groups. This approach avoids the difficulties inherent in interpreting the ethnicity  
22 coefficient in regression models controlling for other variables<sup>20</sup>, however it also limits the interpretation of  
23 the data. In addition, the total sample size for this mental health analysis was ~1,700 mothers and many  
24 estimates in the analyses were, as a consequence, imprecise with wide confidence intervals. These results  
25 demonstrate the need for further studies with sufficient sample sizes, including boosted samples of ethnic  
26 minority groups to enable accurate understanding of the possible differing experiences and needs of the  
27 diverse UK population.  
28

29 Whilst it is possible that our results are influenced by the survey response rate of 28%, these participants  
30 were representative of the BiBGU and BiBBS cohorts<sup>15</sup>, including on the rates of baseline depression and  
31 anxiety scores, and have demonstrated a wide variability in most characteristics (Table 1).  
32

33 We undertook stratified analyses to explore ethnic differences in how exposures related to changes in  
34 mental health between pre-pandemic times to during lockdown. However, whilst our analysis was able to  
35 look for differences between Pakistani heritage and White British mothers, we were unable to explore the  
36 heterogeneity of the 'other' ethnic group and we have no doubt missed important nuances in this population  
37 based on different social and cultural experiences.  
38

39 We will continue to follow the BiBGU and BiBBS families so that we can look at trajectories of change over  
40 time, including during any future national or regional lockdowns. At time of writing (November 2020), the  
41 UK was under a further nationwide lockdown, following a period of reduced restrictions during summer  
42 2020 and tighter regional restrictions in the more deprived cities of Northern England, including Bradford,  
43 though the autumn. The impact of further and longer periods of restrictions and lockdowns will be a focus  
44 of our study moving forwards. As the longitudinal follow-up lengthens and more data become available it  
45 may be possible to model different transitions in mental health in relation to changing social and economic  
46 circumstances. It may also be of interest to explore positive / null transitions from clinically important  
47 symptoms to mild/no symptoms, or continued mild/no symptoms despite reported exposure to adversity.  
48

49 Our results highlight the potential public health impact of lockdown on mental health, particularly in those  
50 who are lonely and economically insecure. Mental health problems are in general less visible than physical  
51 symptoms and in particular the physical symptoms related to Covid-19, including the acutely ill patients in  
52 ICUs, but may have more significant longer-term consequences. This study also suggests a complex  
53 interplay of factors between an individuals' circumstances and the odds of worsening mental health during  
54 the pandemic. A 'one-size fits all' approach to supporting mental ill health will not be effective; instead,  
55 understanding and addressing the potential causes in different groups will be important. For example, in  
56 case of future need for social distancing measures, government and local councils should consider policies  
57 that permit 'social bubbles' that can be implemented to reduce loneliness for those at risk of mental health  
58 problems, and they as well as voluntary services should continue to focus support to those who are  
59 lonely/isolated. Policy and decision makers should also make provision for the continuing need to support  
60

1 and protect vulnerable families from financial, food and housing insecurity, all of which were associated  
2 with poor mental health in this study. These actions will be important throughout any further regional and  
3 national lockdowns and during the post-pandemic period of recovery.  
4  
5  
6  
7  
8  
9  
10  
11  
12  
13  
14  
15  
16  
17  
18  
19  
20  
21  
22  
23  
24  
25  
26  
27  
28  
29  
30  
31  
32  
33  
34  
35  
36  
37  
38  
39  
40  
41  
42  
43  
44  
45  
46  
47  
48  
49  
50  
51  
52  
53  
54  
55  
56  
57  
58  
59  
60

For peer review only



## DISSEMINATION DECLARATION

The findings of the study were also shared with our community research advisory groups to enhance interpretation. We will share our findings with all participants using a combination of social media, infographics posted to participants and community dissemination events

## DATA (AND SOFTWARE) AVAILABILITY

Born in Bradford offer open access to their data resources. Available data and procedures to access this can be found at: <https://borninbradford.nhs.uk/research/how-to-access-data/>

## AUTHOR CONTRIBUTIONS

JD was involved in the concept and study design, design of the data collection tools, overall supervision of the study and data collection, wrote the statistical analysis plan, and drafted and revised the paper. She is guarantor. BK was involved in the design of data collection tools, wrote the statistical analysis plan, conducted all statistical analyses, and drafted and revised the paper. BL devised the coding framework for free text responses, analysed the data and drafted and revised the paper. SB was involved in the concept and study design, design of the data collection tools, supervision of the study and data collection, and reviewing and revising the paper. CC was involved in the concept and study design, and reviewing and revising the paper. KW was involved in design of the data collection tools, data curation, analysis, reviewing and revising the paper. KS was involved in the study design, design of the data collection tools, supervision of the study and data collection, and reviewing and revising the paper. KC was involved in the study design, design of the data collection tools, supervision of the study and data collection, data curation and reviewing and revising the paper. MB involved in the study design, and drafted and revised the paper. NS advised on the clinical significance of changes in mental ill health, revising the statistical analysis plan, and drafted and revised the paper. TS was involved in the concept and study design, supervision and support to junior members of the team and drafted and revised the paper. DAL was involved in the concept and study design, design of the data collection tools, and drafted and revised the paper. JW was involved in the concept and study design, design of the data collection tools, supervision and support to junior members of the team and drafted and revised the paper. RM was involved in the concept and study design, design of the data collection tools, revised the statistical analysis plan, and drafted and revised the paper. KP was involved in the concept and study design, design of the data collection tools, revised the statistical analysis plan, supervision and support to junior members of the team and drafted and revised the paper.

## COMPETING INTERESTS

All authors have completed the ICMJE uniform disclosure form at [www.icmje.org/coi\\_disclosure.pdf](http://www.icmje.org/coi_disclosure.pdf) and declare: all authors had financial support from funding bodies listed below for the submitted work; no financial relationships with any organisations that might have an interest in the submitted work in the previous three years; no other relationships or activities that could appear to have influenced the submitted work, with the exception of DAL who declares previous support from Roche Diagnostics and Medtronic Ltd for research unrelated to that presented here.

## FUNDING INFORMATION

This study was funded by The Health foundation Covid-19 Award (2301201), with further contributions from: A Wellcome Trust infrastructure grant (WT101597MA); A joint grant from the UK Medical Research Council (MRC) and UK Economic and Social Science Research Council (ESRC): MR/N024391/1; The National Institute for Health Research under its Applied Research Collaboration Yorkshire and Humber (NIHR200166); ActEarly UK Prevention Research Partnership Consortium (MR/S037527/1); Better Start Bradford through The National Lottery Community Fund; and the British Heart Foundation (CS/16/4/32482). DAL works in a unit that received support from the University of Bristol and UK Medical Research Council (MC\_UU\_00011/6) and is a UK National Institute of Health Research senior Investigator (NF-0616-10102)

## ACKNOWLEDGEMENTS

Born in Bradford is only possible because of the enthusiasm and commitment of the children and parents in BiB. We are grateful to all the participants, parent governors and community research advisory group members, schools, health professionals and researchers who have made Born in Bradford happen.

This report is independent research partly funded by the National Institute for Health Research Yorkshire and Humber ARC. The views expressed in this publication are those of the authors and not necessarily those of the National Institute for Health Research or the Department of Health and Social Care.

## TRANSPARENCY STATEMENT

The lead author (the manuscript's guarantor) affirms that the manuscript is an honest, accurate, and transparent account of the study being reported; that no important aspects of the study have been omitted; and that any discrepancies from the study as originally planned (and, if relevant, registered) have been explained.

For peer review only

## 1. REFERENCES

1. Coronavirus (Covid-19) UK Government Response. <https://www.gov.uk/coronavirus>. Accessed 27.11.20
2. Number of coronavirus (COVID-19) cases and risk in the UK. UK Government Guidance. <https://www.gov.uk/guidance/coronavirus-covid-19-information-for-the-public> . Accessed 27.11.20
3. Office of National Statistics (2020). Coronavirus and depression in adults, Great Britain: June 2020. <https://www.ons.gov.uk/peoplepopulationandcommunity/wellbeing/articles/coronavirusanddepressioninadultsgreatbritain/june2020>. Accessed 27.11.20
4. Kwong ASF, Pearson RM, Adams MJ, et al., Mental health during the COVID-19 pandemic in two longitudinal UK population cohorts. *MedRxiv* 2020; 20133116. doi: 10.1101/2020.06.16.20133116
5. Pierce M, Hope H, Ford T, et al., Mental health before and during the COVID-19 pandemic: a longitudinal probability sample survey of the UK population. *Lancet Psychiatry* 2020, [https://doi.org/10.1016/S2215-0366\(20\)30308-4](https://doi.org/10.1016/S2215-0366(20)30308-4)
6. Mind (2020). The mental health emergency: how has the coronavirus pandemic impacted our mental health? London: Mind. Available at: [mind.org.uk](http://mind.org.uk). Accessed 27.11.20
7. Fancourt D, Steptoe A, Bu F. Trajectories of depression and anxiety during enforced isolation due to COVID-19: longitudinal analyses of 59,318 adults in the UK with and without diagnosed mental illness. *medRxiv* 2020. doi: <https://doi.org/10.1101/2020.06.03.20120923>
8. Bignall T, Jeraj S, Helsby E, Butt J. Racial disparities in mental health: Literature and evidence review. Race Equality Foundation 2019. <https://raceequalityfoundation.org.uk/wp-content/uploads/2020/03/mental-health-report-v5-2.pdf>. Accessed 27.11.20
9. Grey T, Sewell H, Shapiro G, Ashraf F. Mental Health Inequalities Facing U.K. Minority Ethnic Populations Causal Factors and Solutions. *J Psychological Issues in Organizational Culture*. 2013; 3 (S1).
10. Public Health England. COVID-19: mental health and wellbeing surveillance report: <https://www.gov.uk/government/publications/covid-19-mental-health-and-wellbeing-surveillance-report/2-important-findings-so-far#which-population-groups-appear-to-be-disproportionally-affected>. Accessed 27.11.20
11. Wright J, Raynor P, Tuffnell D, et al. Cohort Profile: The Born in Bradford multi-ethnic family cohort study. *International Journal of Epidemiology*, Volume 42, Issue 4, August 2013, Pages 978–991, <https://doi.org/10.1093/ije/dys112>
12. Bird PK, McEachan RRC, Mon-Williams M, Small N, West J, Whincup P, Wright J, Andrews E, Barber SE, Hill LJB *et al*: Growing up in Bradford: protocol for the age 7–11 follow up of the Born in Bradford birth cohort. *BMC Public Health* 2019, 19(1):939.
13. Dickerson J, Bird PK, McEachan RRC, Pickett KE, Waiblinger D, Uphoff E, Mason D, Bryant M, Bywater T, Bowyer-Crane C *et al*: Born in Bradford's Better Start: an experimental birth cohort study to evaluate the impact of early life interventions. *BMC Public Health* 2016, 16(1):711.
14. McEachan RRC, Dickerson J, Bridges S *et al*. The Born in Bradford COVID-19 Research Study: Protocol for an adaptive mixed methods research study to gather actionable intelligence on the impact of COVID-19 on health inequalities amongst families living in Bradford [version 1; peer review: 3 approved]. *Wellcome Open Res* 2020, 5:191 (<https://doi.org/10.12688/wellcomeopenres.16129.1>)
15. Dickerson J, Kelly B, Lockyer B *et al*. Experiences of lockdown during the Covid-19 pandemic: descriptive findings from a survey of families in the Born in Bradford study [version 2; peer review: 2 approved]. *Wellcome Open Res* 2021, 5:228 (<https://doi.org/10.12688/wellcomeopenres.16317.2>)
16. Kroenke K, Strine TW, Spitzer RL, Williams JBW, Berry JT, Mokdad AH: The PHQ-8 as a measure of current depression in the general population. *Journal of Affective Disorders* 2009, 114(1):163-173.



17. Löwe B, Decker O, Müller S, Brähler E, Schellberg D, Herzog W, Herzberg PY: Validation and Standardization of the Generalized Anxiety Disorder Screener (GAD-7) in the General Population. *Medical Care* 2008, 46(3):266-274.
18. Husain N, Waheed W, Tomenson B, Creed F. The validation of personal health questionnaire amongst people of Pakistani family origin living in the United Kingdom. *Journal of Affective Disorders* 2007, 97: 261-264.
19. McMillan D, Gilbody S, Richards D. Defining successful treatment outcome in depression using the PHQ-9: A comparison of methods. *J. Affective Disorders*. 2010: 127; 122–129
20. VanderWeele, T. J., & Robinson, W. R. On the causal interpretation of race in regressions adjusting for confounding and mediating variables. *Epidemiology*. 2014: 25(4), 473–484.
21. StataCorp. 2017. Stata Statistical Software: Release 15. College Station, TX: StataCorp LLC.
22. Braun V, Clarke V: Using thematic analysis in psychology. *Qualitative Research in Psychology* 2006, 3(2):77-101.
23. Prady SL, Pickett KE, Petherick ES, Gilbody S, Croudace T, Mason D, Sheldon TA, Wright J. (2016). Evaluation of ethnic disparities in detection of depression and anxiety in primary care during the maternal period: combined analysis of routine and cohort data. *The British journal of psychiatry*, 208(5), 453-61. DOI 10.1192/bjp.bp.114.158832. PMID 26795424
24. Prady SL, Pickett KE, Gilbody S, Petherick ES, Mason D, Sheldon TA, and Wright J (2016). Variation and ethnic inequalities in treatment of common mental disorders before, during and after pregnancy: combined analysis of routine and research data in the Born in Bradford cohort. *BMC Psychiatry*, 16(99), DOI 10.1186/s12888-016-0805-x PMID 27071711
25. Power M, Uphoff N, Stewart-Knox B et al., Food insecurity and socio-demographic characteristics in two UK ethnic groups: an analysis of women in the Born in Bradford cohort. *Journal of Public Health*, 2017. **40**(1): p. 32-40.
26. Yang T.C, Sahota P, Pickett K, Bryant M. Association of food security status with overweight and dietary intake: exploration of White British and Pakistani-origin families in the Born in Bradford cohort. *Nutrition Journal*, 2018. **17**(1): p. 48.

**Table 1: Sample Characteristics of Mothers who responded to the BiB Covid-19 survey (n=1860)****Financial security**

|                                  |     |               |
|----------------------------------|-----|---------------|
| Living comfortably               | 354 | 20% (18%-22%) |
| Doing alright                    | 766 | 42% (40%-45%) |
| Just about getting by            | 462 | 26% (24%-28%) |
| Finding it quite/ very difficult | 223 | 12% (11%-14%) |
| Missing                          | 55  |               |

**Change in financial status (compared to 3 months prior, as asked in lockdown survey)**

|                |     |               |
|----------------|-----|---------------|
| Better off     | 166 | 10% (8%-11%)  |
| About the same | 989 | 58% (55%-60%) |
| Worse off      | 562 | 33% (31%-35%) |
| Missing        | 143 |               |

**Index of Multiple Deprivation 2019 Quintile**

|                   |       |               |
|-------------------|-------|---------------|
| 1: Most Deprived  | 1,211 | 65% (63%-67%) |
| 2                 | 390   | 21% (19%-23%) |
| 3                 | 139   | 7% (6%-9%)    |
| 4                 | 88    | 5% (4%-6%)    |
| 5: Least Deprived | 29    | 2% (1%-2%)    |
| Missing           | 3     |               |

**Employment status of main earner**

|                              |     |               |
|------------------------------|-----|---------------|
| Employed - working from home | 393 | 22% (20%-24%) |
| Employed: going into work    | 567 | 32% (30%-34%) |
| On furlough                  | 271 | 15% (14%-17%) |
| Self-employed: working       | 147 | 8% (7%-10%)   |
| Self-employed: not working   | 200 | 11% (10%-13%) |
| Unemployed                   | 208 | 12% (10%-13%) |
| Missing                      | 74  |               |

**Whether respondent is a keyworker**

|         |       |               |
|---------|-------|---------------|
| No      | 1,259 | 68% (66%-71%) |
| Yes     | 579   | 32% (29%-34%) |
| Missing | 22    |               |

**Whether anyone in household is clinically vulnerable to Covid-19**

|         |       |               |
|---------|-------|---------------|
| No      | 1,419 | 77% (75%-79%) |
| Yes     | 426   | 23% (21%-25%) |
| Missing | 15    |               |

**Whether anyone in household is currently/ has previously self-isolated**

|         |       |               |
|---------|-------|---------------|
| No      | 1,331 | 72% (70%-74%) |
| Yes     | 508   | 28% (26%-30%) |
| Missing | 21    |               |

**Number of children in household**

|              |     |               |
|--------------|-----|---------------|
| One          | 387 | 21% (19%-23%) |
| Two          | 699 | 38% (35%-40%) |
| Three        | 451 | 24% (22%-26%) |
| Four or more | 323 | 17% (16%-19%) |

**Total household size**

|    |                                                                                                                                   |       |               |
|----|-----------------------------------------------------------------------------------------------------------------------------------|-------|---------------|
| 1  | Two/ Three                                                                                                                        | 321   | 17% (16%-19%) |
| 2  | Four/ Five                                                                                                                        | 943   | 51% (49%-53%) |
| 3  | Six or more                                                                                                                       | 583   | 32% (29%-34%) |
| 4  | Missing                                                                                                                           | 13    |               |
| 5  |                                                                                                                                   |       |               |
| 6  | <b>Whether single parent</b>                                                                                                      |       |               |
| 7  | No                                                                                                                                | 1,604 | 88% (86%-89%) |
| 8  | Yes                                                                                                                               | 222   | 12% (11%-14%) |
| 9  | Missing                                                                                                                           | 34    |               |
| 10 |                                                                                                                                   |       |               |
| 11 |                                                                                                                                   |       |               |
| 12 | <b>Quality of relationship with partner (for those married or in a relationship, n=1604)</b>                                      |       |               |
| 13 | Excellent                                                                                                                         | 783   | 51% (48%-53%) |
| 14 | Good                                                                                                                              | 598   | 39% (36%-41%) |
| 15 | Average                                                                                                                           | 129   | 8% (7%-10%)   |
| 16 | Poor                                                                                                                              | 23    | 1% (1%-2%)    |
| 17 | Very poor                                                                                                                         | 10    | 1% (0%-1%)    |
| 18 | Missing                                                                                                                           | 61    |               |
| 19 |                                                                                                                                   |       |               |
| 20 | <b>Loneliness: How often felt lonely in the past week</b>                                                                         |       |               |
| 21 | None, or almost none of the time                                                                                                  | 998   | 57% (55%-60%) |
| 22 | Some of the time                                                                                                                  | 555   | 32% (30%-34%) |
| 23 | Most of the time                                                                                                                  | 131   | 8% (6%-9%)    |
| 24 | All, or almost all of the time                                                                                                    | 56    | 3% (2%-4%)    |
| 25 | Missing                                                                                                                           | 120   |               |
| 26 |                                                                                                                                   |       |               |
| 27 | <b>Social support: how easy to get help from friends/ neighbours if needed</b>                                                    |       |               |
| 28 | Very difficult                                                                                                                    | 101   | 6% (5%-7%)    |
| 29 | Difficult                                                                                                                         | 146   | 8% (7%-9%)    |
| 30 | Possible                                                                                                                          | 529   | 29% (27%-31%) |
| 31 | Easy                                                                                                                              | 529   | 29% (27%-31%) |
| 32 | Very easy                                                                                                                         | 513   | 28% (26%-30%) |
| 33 | Missing                                                                                                                           | 42    |               |
| 34 |                                                                                                                                   |       |               |
| 35 |                                                                                                                                   |       |               |
| 36 | <b>Food security: How often is it true that food does not last</b>                                                                |       |               |
| 37 | Never                                                                                                                             | 1,379 | 79% (77%-81%) |
| 38 | Sometimes                                                                                                                         | 279   | 16% (14%-18%) |
| 39 | Often                                                                                                                             | 91    | 5% (4%-6%)    |
| 40 | Missing                                                                                                                           | 111   |               |
| 41 |                                                                                                                                   |       |               |
| 42 | <b>Housing security: Whether worried about eviction/ repossession</b>                                                             |       |               |
| 43 | Strongly disagree or disagree                                                                                                     | 1,250 | 71% (68%-73%) |
| 44 | Neither                                                                                                                           | 328   | 19% (17%-20%) |
| 45 | Strongly agree/ agree                                                                                                             | 194   | 11% (10%-12%) |
| 46 | Missing                                                                                                                           | 88    |               |
| 47 |                                                                                                                                   |       |               |
| 48 |                                                                                                                                   |       |               |
| 49 | <b>Job security: Whether they expect the main earner to still have a job in 12 months (for those currently employed (n=1652))</b> |       |               |
| 50 | No                                                                                                                                | 77    | 5% (4%-6%)    |
| 51 | Yes                                                                                                                               | 979   | 61% (59%-64%) |
| 52 | Don't know                                                                                                                        | 537   | 34% (31%-36%) |
| 53 | Missing                                                                                                                           | 59    |               |
| 54 |                                                                                                                                   |       |               |
| 55 |                                                                                                                                   |       |               |
| 56 | <b>Housing conditions: Whether damp in house</b>                                                                                  |       |               |
| 57 | No                                                                                                                                | 1,307 | 71% (69%-73%) |
| 58 | Yes                                                                                                                               | 534   | 29% (27%-31%) |
| 59 | Missing                                                                                                                           | 19    |               |
| 60 |                                                                                                                                   |       |               |

**Frequency of physical activity currently**

|                    |     |               |
|--------------------|-----|---------------|
| Never              | 239 | 13% (12%-15%) |
| 1 or 2 days a week | 489 | 27% (25%-29%) |
| Most days          | 516 | 28% (26%-30%) |
| Every day          | 586 | 32% (30%-34%) |
| Missing            | 30  |               |

**Change in frequency of physical activity since lockdown**

|                |     |               |
|----------------|-----|---------------|
| Less           | 766 | 48% (46%-51%) |
| About the same | 408 | 26% (24%-28%) |
| More           | 419 | 26% (24%-29%) |
| Missing        | 267 |               |

For peer review only

**Table 2: Depression and Anxiety Scores in the Pre-Covid-19 and Covid-19 surveys (n=1860).**

|                                           | Pre-Covid-19 survey |                     | Covid-19 survey |                     |
|-------------------------------------------|---------------------|---------------------|-----------------|---------------------|
|                                           | N                   | Percentage (95% CI) | N               | Percentage (95% CI) |
| <b>Depression category (PHQ-8)</b>        |                     |                     |                 |                     |
| None (PHQ-8 score 0 to 4)                 | 1187                | 65% (63%-68%)       | 1001            | 56% (54%-59%)       |
| Mild (PHQ-8 score 5 to 9)                 | 414                 | 23% (21%-25%)       | 425             | 24% (22%-26%)       |
| Moderate to Severe (PHQ-8 score 10 to 24) | 212                 | 12% (10%-13%)       | 349             | 20% (18%-22%)       |
| Missing                                   | 47                  |                     | 85              |                     |
| <b>Anxiety category (GAD7)</b>            |                     |                     |                 |                     |
| None (GAD-7 score 0 to 4)                 | 1280                | 75% (72%-77%)       | 1075            | 61% (58%-63%)       |
| Mild (GAD-7 score 5 to 9)                 | 270                 | 16% (14%-18%)       | 408             | 23% (21%-25%)       |
| Moderate to Severe (GAD-7 score 10 to 21) | 167                 | 10% (8%-11%)        | 289             | 16% (15%-18%)       |
| Missing                                   | 143                 |                     | 88              |                     |

Table 3: Change in PHQ-8 and GAD-7 categories from Pre-Covid-19 baseline to Covid-19 lockdown survey.

| Pre-Covid-19 PHQ8 |           | PHQ8 at Covid-19 Lockdown Survey |                  |         |             |
|-------------------|-----------|----------------------------------|------------------|---------|-------------|
| Category          | None      | Mild                             | Moderate/ Severe | Missing | Total       |
| None              | 759 (67%) | 257 (23%)                        | 118 (10%)        | 53      | 1187 (100%) |
| Mild              | 171 (44%) | 110 (28%)                        | 112 (28%)        | 21      | 414 (100%)  |
| Moderate/ Severe  | 48 (24%)  | 46 (23%)                         | 109 (54%)        | 9       | 212 (100%)  |
| Missing           | 23        | 12                               | 10               | 2       | 47 (100%)   |
| Total             | 978       | 413                              | 339              | 85      | 1860 (100%) |

  

| Pre-Covid-19 GAD7 |           | GAD7 at Covid-19 Lockdown Survey |                  |         |             |
|-------------------|-----------|----------------------------------|------------------|---------|-------------|
| Category          | None      | Mild                             | Moderate/ Severe | Missing | Total       |
| None              | 851 (70%) | 247 (20%)                        | 118 (10%)        | 64      | 1280 (100%) |
| Mild              | 95 (37%)  | 91 (36%)                         | 70 (27%)         | 14      | 270 (100%)  |
| Moderate/ Severe  | 47 (29%)  | 44 (27%)                         | 71 (44%)         | 5       | 167 (100%)  |
| Missing           | 82        | 26                               | 30               | 5       | 143 (100%)  |
| Total             | 993       | 382                              | 259              | 88      | 1860 (100%) |

RED: category worse in lockdown compared to baseline;

AMBER: category stayed the same;

GREEN: category improved in lockdown compared to baseline

**Table 4: Odds ratios (with 95% CI) from unadjusted logistic regression models for an increase of 5 points or more on PHQ-8 and GAD-7 between pre-Covid-19 and Covid-19 lockdown survey.**

| Exposure                                                                                 | PHQ-8 increase $\geq$ 5 |            |             | GAD-7 increase $\geq$ 5 |            |             |
|------------------------------------------------------------------------------------------|-------------------------|------------|-------------|-------------------------|------------|-------------|
|                                                                                          | Odds Ratio              | Low 95% CI | High 95% CI | Odds Ratio              | Low 95% CI | High 95% CI |
| <b>Ethnicity</b><br>(Reference: White British)                                           |                         |            |             |                         |            |             |
| Pakistani heritage                                                                       | 0.88                    | 0.68       | 1.15        | 0.94                    | 0.72       | 1.23        |
| <b>Age group</b><br>(Reference: Under 30 years)                                          |                         |            |             |                         |            |             |
| 30 to 34 years                                                                           | 1.01                    | 0.66       | 1.54        | 0.90                    | 0.57       | 1.42        |
| 35 to 39 years                                                                           | 0.89                    | 0.59       | 1.35        | 0.99                    | 0.64       | 1.53        |
| 40 to 44 years                                                                           | 1.04                    | 0.69       | 1.58        | 0.88                    | 0.57       | 1.38        |
| 45 years plus                                                                            | 0.92                    | 0.59       | 1.45        | 1.02                    | 0.64       | 1.63        |
| <b>Financial security at pre-Covid-19 survey</b><br>(Reference: Living comfortably)      |                         |            |             |                         |            |             |
| Doing alright                                                                            | 1.07                    | 0.81       | 1.42        | 1.19                    | 0.89       | 1.59        |
| Just about getting by                                                                    | 1.72                    | 1.23       | 2.40        | 1.66                    | 1.17       | 2.35        |
| Finding it quite/ very difficult                                                         | 1.70                    | 1.03       | 2.80        | 2.39                    | 1.44       | 3.98        |
| <b>Financial security at lockdown survey</b><br>(Reference: Living comfortably)          |                         |            |             |                         |            |             |
| Doing alright                                                                            | 1.74                    | 1.18       | 2.56        | 1.47                    | 1.00       | 2.17        |
| Just about getting by                                                                    | 3.52                    | 2.36       | 5.26        | 3.20                    | 2.15       | 4.76        |
| Finding it quite/ very difficult                                                         | 6.23                    | 3.96       | 9.80        | 6.03                    | 3.82       | 9.51        |
| <b>Change in financial status compared to 3 months ago</b><br>(Reference: Better off)    |                         |            |             |                         |            |             |
| About the same                                                                           | 0.65                    | 0.43       | 0.98        | 0.88                    | 0.55       | 1.40        |
| Worse off                                                                                | 1.36                    | 0.89       | 2.01        | 1.99                    | 1.25       | 3.19        |
| <b>Index of Multiple Deprivation 2019 Quintile</b><br>(Reference: 1 Most deprived fifth) |                         |            |             |                         |            |             |
| 2                                                                                        | 0.90                    | 0.67       | 1.21        | 1.22                    | 0.92       | 1.63        |
| 3                                                                                        | 0.91                    | 0.58       | 1.41        | 0.87                    | 0.55       | 1.39        |
| 4                                                                                        | 0.76                    | 0.43       | 1.34        | 0.98                    | 0.57       | 1.68        |
| 5 Least deprived fifth                                                                   | 0.85                    | 0.34       | 2.13        | 0.99                    | 0.39       | 2.48        |
| Per 1 fifth increase in lower deprivation                                                | 1.07                    | 0.94       | 1.25        | 1.00                    | 0.88       | 1.13        |
| <b>Employment status of main earner</b><br>(Reference: Employed and working from home)   |                         |            |             |                         |            |             |
| Employed: going into work                                                                | 1.18                    | 0.84       | 1.65        | 1.20                    | 0.85       | 1.69        |
| On furlough                                                                              | 1.19                    | 0.79       | 1.79        | 1.29                    | 0.85       | 1.94        |
| Self-employed: working                                                                   | 0.90                    | 0.53       | 1.51        | 0.92                    | 0.55       | 1.57        |
| Self-employed: not working                                                               | 1.49                    | 0.97       | 2.27        | 1.31                    | 0.84       | 2.04        |
| Unemployed                                                                               | 2.03                    | 1.34       | 3.09        | 2.23                    | 1.44       | 3.44        |
| <b>Whether respondent is a keyworker</b><br>(Reference: No)                              |                         |            |             |                         |            |             |
| Yes                                                                                      | 0.99                    | 0.77       | 1.27        | 1.05                    | 0.82       | 1.35        |

|    |                                                      |      |      |       |      |      |       |
|----|------------------------------------------------------|------|------|-------|------|------|-------|
| 1  | <b>Whether anyone in household is clinically</b>     |      |      |       |      |      |       |
| 2  | <b>vulnerable to Covid-19</b>                        |      |      |       |      |      |       |
| 3  | <b>(Reference: No)</b>                               |      |      |       |      |      |       |
| 4  | Yes                                                  | 1.68 | 1.29 | 2.19  | 1.53 | 1.17 | 2.01  |
| 5  |                                                      |      |      |       |      |      |       |
| 6  | <b>Whether anyone in household is currently/ has</b> |      |      |       |      |      |       |
| 7  | <b>previously self-isolated</b>                      |      |      |       |      |      |       |
| 8  | <b>(Reference: No)</b>                               |      |      |       |      |      |       |
| 9  | Yes                                                  | 1.59 | 1.24 | 2.04  | 1.48 | 1.14 | 1.92  |
| 10 |                                                      |      |      |       |      |      |       |
| 11 | <b>Number of children in household</b>               |      |      |       |      |      |       |
| 12 | <b>(Reference: One)</b>                              |      |      |       |      |      |       |
| 13 | Two                                                  | 1.20 | 0.87 | 1.67  | 1.05 | 0.76 | 1.45  |
| 14 | Three                                                | 1.39 | 0.98 | 1.98  | 1.20 | 0.84 | 1.71  |
| 15 | Four or more                                         | 1.12 | 0.76 | 1.65  | 0.93 | 0.62 | 1.39  |
| 16 |                                                      |      |      |       |      |      |       |
| 17 |                                                      |      |      |       |      |      |       |
| 18 | <b>Total household size</b>                          |      |      |       |      |      |       |
| 19 | <b>(Reference: Less than four)</b>                   |      |      |       |      |      |       |
| 20 | Four or Five                                         | 0.73 | 0.53 | 0.99  | 0.95 | 0.69 | 1.32  |
| 21 | Six or more                                          | 0.72 | 0.51 | 1.00  | 0.90 | 0.63 | 1.29  |
| 22 |                                                      |      |      |       |      |      |       |
| 23 | <b>Whether single parent</b>                         |      |      |       |      |      |       |
| 24 | <b>(Reference: No)</b>                               |      |      |       |      |      |       |
| 25 | Yes                                                  | 1.66 | 1.18 | 2.33  | 1.28 | 0.89 | 1.85  |
| 26 |                                                      |      |      |       |      |      |       |
| 27 | <b>Quality of relationship with partner</b>          |      |      |       |      |      |       |
| 28 | <b>(Reference: Excellent)</b>                        |      |      |       |      |      |       |
| 29 | Good                                                 | 1.93 | 1.45 | 2.57  | 1.82 | 1.35 | 2.44  |
| 30 | Average to poor                                      | 3.64 | 2.44 | 5.43  | 5.07 | 3.37 | 7.62  |
| 31 |                                                      |      |      |       |      |      |       |
| 32 |                                                      |      |      |       |      |      |       |
| 33 | <b>Loneliness</b>                                    |      |      |       |      |      |       |
| 34 | <b>(Reference: Not lonely)</b>                       |      |      |       |      |      |       |
| 35 | Lonely most/ all of the time                         | 8.37 | 5.70 | 12.27 | 8.50 | 5.71 | 12.65 |
| 36 |                                                      |      |      |       |      |      |       |
| 37 | <b>Social support</b>                                |      |      |       |      |      |       |
| 38 | <b>(Reference: Easy to get support)</b>              |      |      |       |      |      |       |
| 39 | Not easy to get support                              | 2.25 | 1.78 | 2.86  | 2.13 | 1.67 | 2.73  |
| 40 |                                                      |      |      |       |      |      |       |
| 41 | <b>Food security</b>                                 |      |      |       |      |      |       |
| 42 | <b>(Reference: Secure)</b>                           |      |      |       |      |      |       |
| 43 | Insecure - Often true that food does not last        | 3.33 | 2.09 | 5.28  | 3.46 | 2.15 | 5.58  |
| 44 |                                                      |      |      |       |      |      |       |
| 45 | <b>Housing security</b>                              |      |      |       |      |      |       |
| 46 | <b>(Reference: Secure)</b>                           |      |      |       |      |      |       |
| 47 | Insecure - Worried about eviction/ repossession      | 3.29 | 2.36 | 4.58  | 3.00 | 2.11 | 4.25  |
| 48 |                                                      |      |      |       |      |      |       |
| 49 | <b>Job security: whether expect main earner to</b>   |      |      |       |      |      |       |
| 50 | <b>still have job in 12 months</b>                   |      |      |       |      |      |       |
| 51 | <b>(Reference: Yes)</b>                              |      |      |       |      |      |       |
| 52 | No                                                   | 0.84 | 0.49 | 1.43  | 0.96 | 0.56 | 1.64  |
| 53 |                                                      |      |      |       |      |      |       |
| 54 | <b>Housing conditions</b>                            |      |      |       |      |      |       |
| 55 | <b>(Reference: No damp in house)</b>                 |      |      |       |      |      |       |
| 56 | Damp in house                                        | 1.85 | 1.45 | 2.38  | 1.57 | 1.21 | 2.03  |
| 57 |                                                      |      |      |       |      |      |       |
| 58 | <b>Frequency of physical activity</b>                |      |      |       |      |      |       |
| 59 | <b>(Reference: Every day)</b>                        |      |      |       |      |      |       |
| 60 | Most days                                            | 1.58 | 1.15 | 2.18  | 1.67 | 1.21 | 2.31  |



|    |                                                                |      |      |      |      |      |      |
|----|----------------------------------------------------------------|------|------|------|------|------|------|
| 1  | 1 or 2 days a week                                             | 1.93 | 1.40 | 2.67 | 1.67 | 1.20 | 2.31 |
| 2  | Never                                                          | 3.13 | 2.15 | 4.56 | 2.55 | 1.72 | 3.78 |
| 3  |                                                                |      |      |      |      |      |      |
| 4  |                                                                |      |      |      |      |      |      |
| 5  | <b>Change in frequency of physical activity since lockdown</b> |      |      |      |      |      |      |
| 6  | <b>(Reference: More than before)</b>                           |      |      |      |      |      |      |
| 7  | About the same                                                 | 0.66 | 0.45 | 0.97 | 0.82 | 0.56 | 1.21 |
| 8  | Less than before                                               | 1.27 | 0.94 | 1.72 | 1.43 | 1.04 | 1.95 |
| 9  |                                                                |      |      |      |      |      |      |
| 10 |                                                                |      |      |      |      |      |      |
| 11 | <b>Time between baseline and Covid-19 lockdown survey</b>      |      |      |      |      |      |      |
| 12 | <b>Time (in Months)</b>                                        |      |      |      |      |      |      |
| 13 | Time (in Months)                                               | 1.00 | 0.99 | 1.01 | 1.00 | 0.99 | 1.01 |
| 14 |                                                                |      |      |      |      |      |      |
| 15 | <b>Cohort Source</b>                                           |      |      |      |      |      |      |
| 16 | <b>(Reference: BiBGU)</b>                                      |      |      |      |      |      |      |
| 17 | BiBBS                                                          | 0.84 | 0.64 | 1.10 | 0.84 | 0.63 | 1.12 |
| 18 |                                                                |      |      |      |      |      |      |
| 19 |                                                                |      |      |      |      |      |      |
| 20 |                                                                |      |      |      |      |      |      |
| 21 |                                                                |      |      |      |      |      |      |
| 22 |                                                                |      |      |      |      |      |      |
| 23 |                                                                |      |      |      |      |      |      |
| 24 |                                                                |      |      |      |      |      |      |
| 25 |                                                                |      |      |      |      |      |      |
| 26 |                                                                |      |      |      |      |      |      |
| 27 |                                                                |      |      |      |      |      |      |
| 28 |                                                                |      |      |      |      |      |      |
| 29 |                                                                |      |      |      |      |      |      |
| 30 |                                                                |      |      |      |      |      |      |
| 31 |                                                                |      |      |      |      |      |      |
| 32 |                                                                |      |      |      |      |      |      |
| 33 |                                                                |      |      |      |      |      |      |
| 34 |                                                                |      |      |      |      |      |      |
| 35 |                                                                |      |      |      |      |      |      |
| 36 |                                                                |      |      |      |      |      |      |
| 37 |                                                                |      |      |      |      |      |      |
| 38 |                                                                |      |      |      |      |      |      |
| 39 |                                                                |      |      |      |      |      |      |
| 40 |                                                                |      |      |      |      |      |      |
| 41 |                                                                |      |      |      |      |      |      |
| 42 |                                                                |      |      |      |      |      |      |
| 43 |                                                                |      |      |      |      |      |      |
| 44 |                                                                |      |      |      |      |      |      |
| 45 |                                                                |      |      |      |      |      |      |
| 46 |                                                                |      |      |      |      |      |      |
| 47 |                                                                |      |      |      |      |      |      |
| 48 |                                                                |      |      |      |      |      |      |
| 49 |                                                                |      |      |      |      |      |      |
| 50 |                                                                |      |      |      |      |      |      |
| 51 |                                                                |      |      |      |      |      |      |
| 52 |                                                                |      |      |      |      |      |      |
| 53 |                                                                |      |      |      |      |      |      |
| 54 |                                                                |      |      |      |      |      |      |
| 55 |                                                                |      |      |      |      |      |      |
| 56 |                                                                |      |      |      |      |      |      |
| 57 |                                                                |      |      |      |      |      |      |
| 58 |                                                                |      |      |      |      |      |      |
| 59 |                                                                |      |      |      |      |      |      |
| 60 |                                                                |      |      |      |      |      |      |

For peer review only

**Table 5a: Odds ratios (with 95% CI) from unadjusted logistic regression models for an increase of 5 points or more on PHQ-8 between pre-Covid-19 and Covid-19 lockdown survey for White British and Pakistani heritage mothers.**

| Exposure                                                           | White British |            |             | Pakistani Heritage |            |             |
|--------------------------------------------------------------------|---------------|------------|-------------|--------------------|------------|-------------|
|                                                                    | Odds Ratio    | Low 95% CI | High 95% CI | Odds Ratio         | Low 95% CI | High 95% CI |
| <b>Financial security (Reference: Living comfortably)</b>          |               |            |             |                    |            |             |
| Doing alright                                                      | 2.00          | 1.12       | 3.56        | 1.70               | 0.88       | 3.27        |
| Just about getting by                                              | 3.98          | 2.15       | 7.38        | 3.03               | 1.56       | 5.88        |
| Finding it quite/ very difficult                                   | 12.14         | 5.15       | 28.60       | 5.79               | 2.90       | 11.56       |
| <b>Food security (Reference: Secure)</b>                           |               |            |             |                    |            |             |
| Insecure                                                           | 3.73          | 1.58       | 8.77        | 4.13               | 2.08       | 8.17        |
| <b>Housing security (Reference: Secure)</b>                        |               |            |             |                    |            |             |
| Insecure                                                           | 4.14          | 2.07       | 8.29        | 3.20               | 1.99       | 5.16        |
| <b>Loneliness (Reference: not lonely)</b>                          |               |            |             |                    |            |             |
| Lonely most/ all of the time                                       | 7.17          | 3.66       | 14.01       | 11.22              | 6.45       | 19.53       |
| <b>Social support (Reference: Easy to get support)</b>             |               |            |             |                    |            |             |
| Not Easy                                                           | 2.08          | 1.39       | 3.10        | 2.20               | 1.54       | 3.14        |
| <b>Quality of relationship with partner (Reference: Excellent)</b> |               |            |             |                    |            |             |
| Good                                                               | 1.68          | 1.02       | 2.77        | 1.76               | 1.15       | 2.68        |
| Average to very poor                                               | 2.61          | 1.31       | 5.20        | 4.91               | 2.78       | 8.67        |
| <b>Total household size (Reference: Less than four)</b>            |               |            |             |                    |            |             |
| Four or Five                                                       | 0.69          | 0.44       | 1.07        | 0.61               | 0.35       | 1.05        |
| Six or more                                                        | 0.91          | 0.47       | 1.73        | 0.54               | 0.31       | 0.94        |
| <b>Frequency of physical activity (Reference: Every day)</b>       |               |            |             |                    |            |             |
| Never                                                              | 5.54          | 2.69       | 11.43       | 3.34               | 1.88       | 5.92        |
| 1 or 2 days a week                                                 | 1.97          | 1.15       | 3.37        | 2.05               | 1.22       | 3.47        |
| Most days a week                                                   | 1.33          | 0.81       | 2.17        | 2.08               | 1.21       | 3.58        |

**Table 5b: Odds ratios (with 95% CI) from unadjusted logistic regression models for an increase of 5 points or more on GAD-7 between pre-Covid-19 and Covid-19 lockdown survey for White British and Pakistani heritage mothers.**

| Exposure                                                           | White British |            |             | Pakistani Heritage |            |             |
|--------------------------------------------------------------------|---------------|------------|-------------|--------------------|------------|-------------|
|                                                                    | Odds Ratio    | Low 95% CI | High 95% CI | Odds Ratio         | Low 95% CI | High 95% CI |
| <b>Financial security (Reference: Living comfortably)</b>          |               |            |             |                    |            |             |
| Doing alright                                                      | 1.70          | 0.97       | 3.00        | 0.93               | 0.50       | 1.74        |
| Just about getting by                                              | 2.82          | 1.53       | 5.21        | 2.55               | 1.39       | 4.68        |
| Finding it quite/ very difficult                                   | 7.69          | 3.43       | 17.26       | 4.35               | 2.27       | 8.30        |
| <b>Food security (Reference: Secure)</b>                           |               |            |             |                    |            |             |
| Insecure                                                           | 3.59          | 1.47       | 8.7         | 4.96               | 2.49       | 9.87        |
| <b>Housing security (Reference: Secure)</b>                        |               |            |             |                    |            |             |
| Insecure                                                           | 3.32          | 1.67       | 6.57        | 3.07               | 1.84       | 5.10        |
| <b>Loneliness (Reference: not lonely)</b>                          |               |            |             |                    |            |             |
| Lonely                                                             | 5.90          | 3.03       | 11.47       | 11.27              | 6.16       | 20.56       |
| <b>Social support (Reference: Easy to get support)</b>             |               |            |             |                    |            |             |
| Not Easy                                                           | 2.33          | 1.55       | 3.51        | 2.09               | 1.45       | 3.01        |
| <b>Quality of relationship with partner (Reference: Excellent)</b> |               |            |             |                    |            |             |
| Good                                                               | 1.54          | 0.93       | 2.55        | 1.88               | 1.22       | 2.89        |
| Average to very poor                                               | 4.39          | 2.26       | 8.53        | 4.99               | 2.72       | 9.14        |
| <b>Total household size (Reference: Less than four)</b>            |               |            |             |                    |            |             |
| Four or Five                                                       | 1.01          | 0.63       | 1.62        | 0.64               | 0.36       | 1.14        |
| Six or more                                                        | 1.13          | 0.58       | 2.20        | 0.61               | 0.34       | 1.07        |
| <b>Frequency of physical activity (Reference: Every day)</b>       |               |            |             |                    |            |             |
| Never                                                              | 3.90          | 1.82       | 8.36        | 2.50               | 1.40       | 4.45        |
| 1 or 2 days a week                                                 | 1.52          | 0.88       | 2.63        | 1.61               | 0.97       | 2.70        |
| Most days a week                                                   | 1.45          | 0.90       | 2.34        | 1.86               | 1.09       | 3.18        |

1  
2  
3  
4  
5  
6  
7  
8  
9  
10  
11  
12  
13  
14  
15  
16  
17  
18  
19  
20  
21  
22  
23  
24  
25  
26  
27  
28  
29  
30  
31  
32  
33  
34  
35  
36  
37  
38  
39  
40  
41  
42  
43  
44  
45  
46  
47  
48  
49  
50  
51  
52  
53  
54  
55  
56  
57  
58  
59  
60

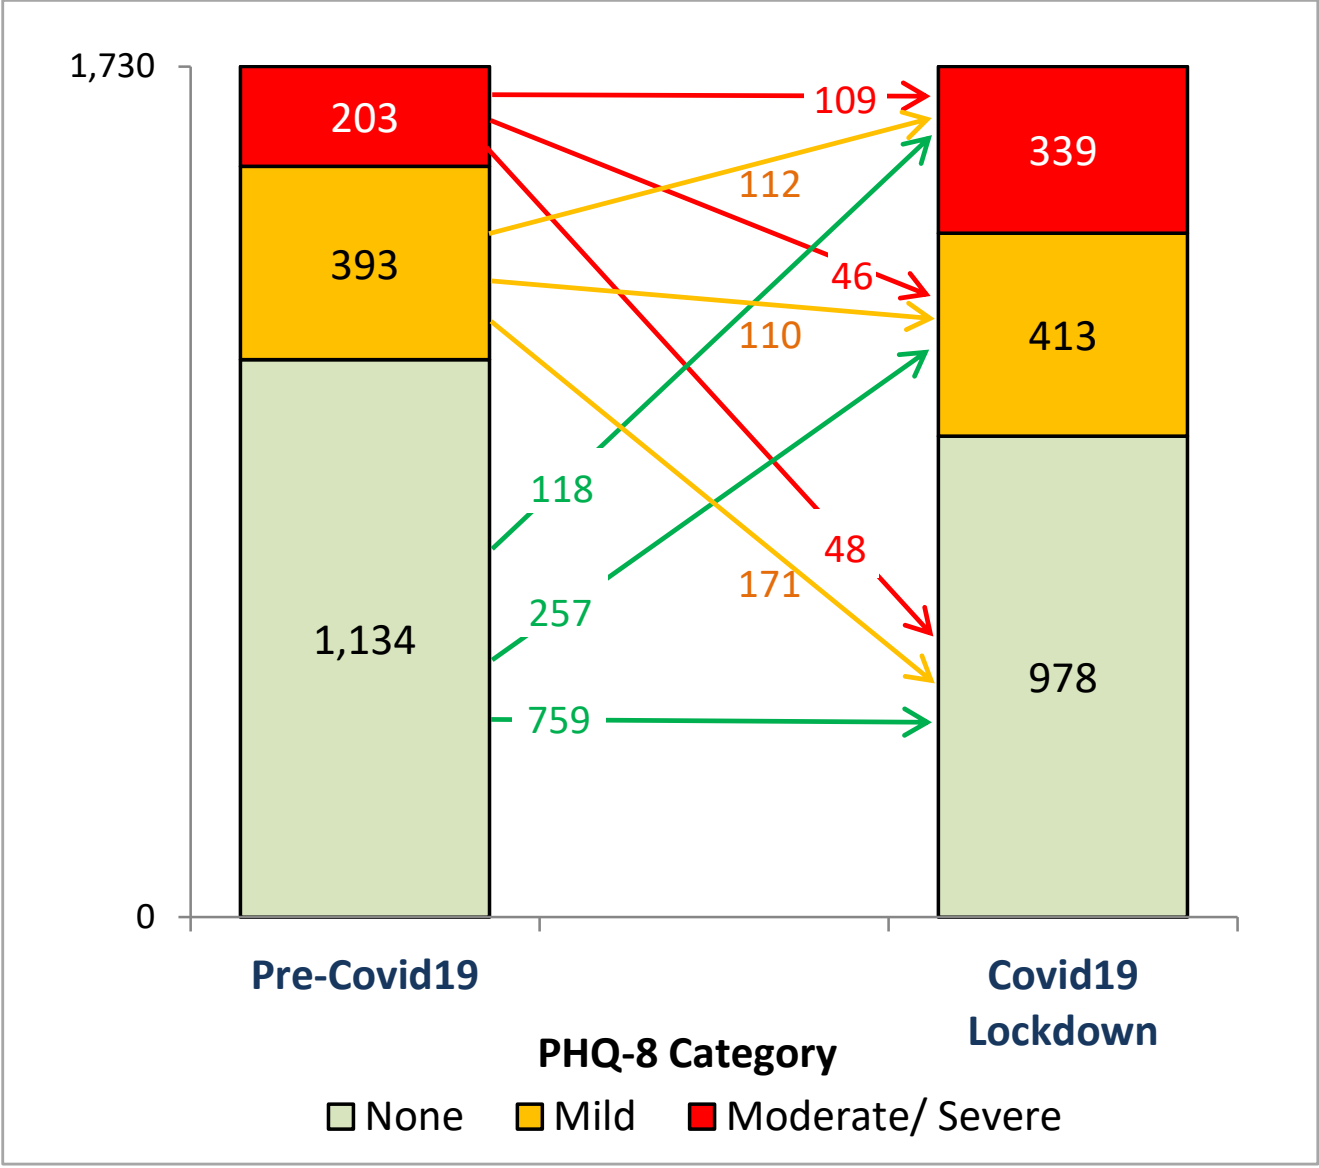

1  
2  
3  
4  
5  
6  
7  
8  
9  
10  
11  
12  
13  
14  
15  
16  
17  
18  
19  
20  
21  
22  
23  
24  
25  
26  
27  
28  
29  
30  
31  
32  
33  
34  
35  
36  
37  
38  
39  
40  
41  
42  
43  
44  
45  
46  
47  
48  
49  
50  
51  
52  
53  
54  
55  
56  
57  
58  
59  
60

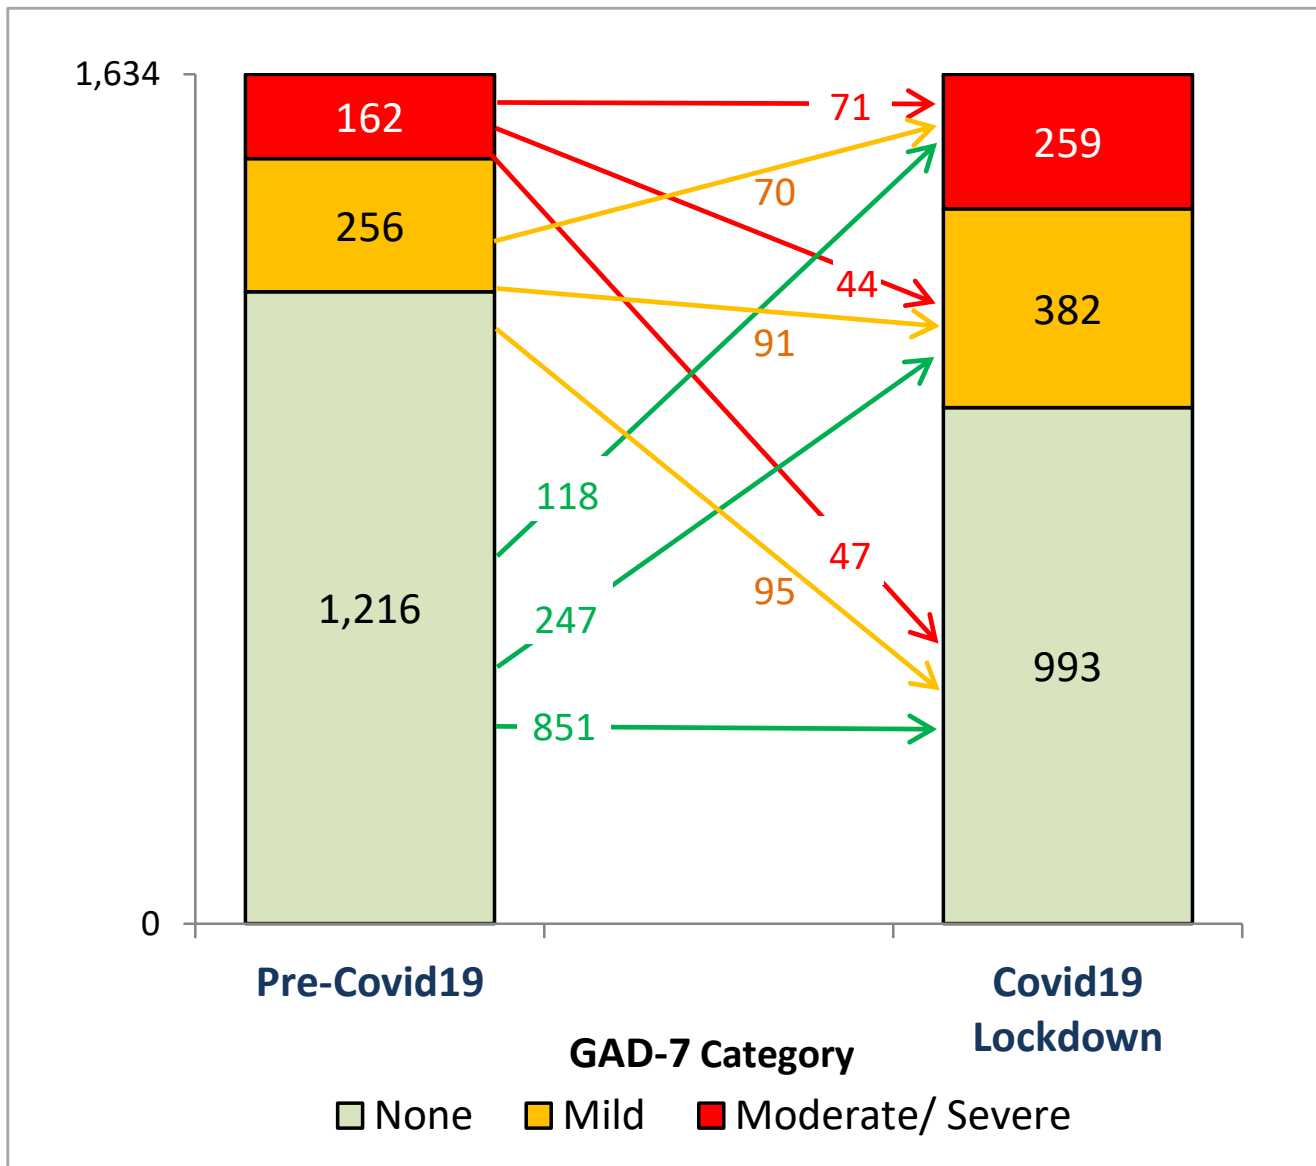

Supplementary Table 1: The sample characteristics of those invited to complete the Covid-19 survey by survey completion status.

| Age                      | Returned Survey (n=2144) |                                 | Not returned survey (n=4722) | Total eligible (n=6866) |
|--------------------------|--------------------------|---------------------------------|------------------------------|-------------------------|
|                          | Complete survey (n=1860) | Incomplete / not linked (n=284) |                              |                         |
| Under 30 yrs.            | 224 (12%)                | 4 (2%)                          | 751 (16%)                    | 963 (14%)               |
| 30 to 34 yrs.            | 396 (21%)                | 22 (10%)                        | 1182 (25%)                   | 1600 (24%)              |
| 35 to 39 yrs.            | 516 (28%)                | 66 (29%)                        | 1367 (29%)                   | 1939 (29%)              |
| 40 to 44 yrs.            | 423 (23%)                | 73 (32%)                        | 892 (19%)                    | 1395 (21%)              |
| 45 yrs. plus             | 301 (16%)                | 61 (27%)                        | 495 (11%)                    | 887 (13%)               |
| Missing                  | -                        | 58                              | 35                           | 82                      |
| <b>Ethnicity*</b>        |                          |                                 |                              |                         |
| White British            | 613 (34%)                | 102 (47%)                       | 821 (18%)                    | 1527 (23%)              |
| Pakistani Heritage       | 877 (48%)                | 80 (37%)                        | 2921 (64%)                   | 3843 (59%)              |
| Other                    | 320 (18%)                | 36 (17%)                        | 803 (18%)                    | 1148 (18%)              |
| Missing                  | 50                       | 66                              | 177                          | 348                     |
| <b>Depression (PHQ8)</b> |                          |                                 |                              |                         |
| None                     | 1187 (66%)               | -                               | 2594 (64%)                   | 3774 (64%)              |
| Mild                     | 414 (23%)                | -                               | 945 (23%)                    | 1345 (23%)              |
| Moderate                 | 135 (7%)                 | -                               | 346 (8%)                     | 475 (8%)                |
| Moderately severe        | 58 (3%)                  | -                               | 134 (3%)                     | 193 (3%)                |
| Severe                   | 19 (1%)                  | -                               | 64 (2%)                      | 83 (1%)                 |
| Missing                  | 47                       | 284                             | 639                          | 996                     |
| <b>Anxiety (GAD7)</b>    |                          |                                 |                              |                         |
| None                     | 1280 (75%)               | -                               | 2720 (72%)                   | 3991 (73%)              |
| Mild                     | 270 (16%)                | -                               | 646 (17%)                    | 908 (17%)               |
| Moderate                 | 100 (6%)                 | -                               | 224 (6%)                     | 322 (6%)                |
| Severe                   | 67 (4%)                  | -                               | 166 (4%)                     | 234 (4%)                |
| Missing                  | 143                      | 284                             | 966                          | 1,411                   |

\*Note: The ethnicity representativeness is skewed by the BiBBS participants who are ~70% South Asian and had a comparatively low response rate to this survey – see reference 15 for explanation

1  
2  
3  
4  
5  
6  
7  
8  
9  
10  
11  
12  
13  
14  
15  
16  
17  
18  
19  
20  
21  
22  
23  
24  
25  
26  
27  
28  
29  
30  
31  
32  
33  
34  
35  
36  
37  
38  
39  
40  
41  
42  
43  
44  
45  
46  
47  
48  
49  
50  
51  
52  
53  
54  
55  
56  
57  
58  
59  
60

For peer review only
