# Supplementary material for: ‘When will this end? Will it end?’ The impact of the March–June 2020 UK COVID-19 lockdown response on mental health: a longitudinal survey of mothers in the Born in Bradford study
Source: PubMed Central journal article supplement (PMC8753090; doi:10.1136/bmjopen-2020-047748), 2022-01-11
Supplement: bmjopen-2020-047748supp001.pdf [file bmjopen-2020-047748supp001.pdf]

Supplementary Table 1: The sample characteristics of those invited to complete the Covid-19 survey by survey completion status.

| <b>Age</b>               | Returned Survey (n=2144) |                                 | Not returned survey (n=4722) | Total eligible (n=6866) |
|--------------------------|--------------------------|---------------------------------|------------------------------|-------------------------|
|                          | Complete survey (n=1860) | Incomplete / not linked (n=284) |                              |                         |
| Under 30 yrs.            | 224 (12%)                | 4 (2%)                          | 751 (16%)                    | 963 (14%)               |
| 30 to 34 yrs.            | 396 (21%)                | 22 (10%)                        | 1182 (25%)                   | 1600 (24%)              |
| 35 to 39 yrs.            | 516 (28%)                | 66 (29%)                        | 1367 (29%)                   | 1939 (29%)              |
| 40 to 44 yrs.            | 423 (23%)                | 73 (32%)                        | 892 (19%)                    | 1395 (21%)              |
| 45 yrs. plus             | 301 (16%)                | 61 (27%)                        | 495 (11%)                    | 887 (13%)               |
| Missing                  | -                        | 58                              | 35                           | 82                      |
| <b>Ethnicity*</b>        |                          |                                 |                              |                         |
| White British            | 613 (34%)                | 102 (47%)                       | 821 (18%)                    | 1527 (23%)              |
| Pakistani Heritage       | 877 (48%)                | 80 (37%)                        | 2921 (64%)                   | 3843 (59%)              |
| Other                    | 320 (18%)                | 36 (17%)                        | 803 (18%)                    | 1148 (18%)              |
| Missing                  | 50                       | 66                              | 177                          | 348                     |
| <b>Depression (PHQ8)</b> |                          |                                 |                              |                         |
| None                     | 1187 (66%)               | -                               | 2594 (64%)                   | 3774 (64%)              |
| Mild                     | 414 (23%)                | -                               | 945 (23%)                    | 1345 (23%)              |
| Moderate                 | 135 (7%)                 | -                               | 346 (8%)                     | 475 (8%)                |
| Moderately severe        | 58 (3%)                  | -                               | 134 (3%)                     | 193 (3%)                |
| Severe                   | 19 (1%)                  | -                               | 64 (2%)                      | 83 (1%)                 |
| Missing                  | 47                       | 284                             | 639                          | 996                     |
| <b>Anxiety (GAD7)</b>    |                          |                                 |                              |                         |
| None                     | 1280 (75%)               | -                               | 2720 (72%)                   | 3991 (73%)              |
| Mild                     | 270 (16%)                | -                               | 646 (17%)                    | 908 (17%)               |
| Moderate                 | 100 (6%)                 | -                               | 224 (6%)                     | 322 (6%)                |
| Severe                   | 67 (4%)                  | -                               | 166 (4%)                     | 234 (4%)                |
| Missing                  | 143                      | 284                             | 966                          | 1,411                   |

\*Note: The ethnicity representativeness is skewed by the BiBBS participants who are ~70% South Asian and had a comparatively low response rate to this survey – see reference 15 for explanation
