# Supplementary material for: ‘When will this end? Will it end?’ The impact of the March–June 2020 UK COVID-19 lockdown response on mental health: a longitudinal survey of mothers in the Born in Bradford study
Source: PubMed Central journal article supplement (PMC8753090; doi:10.1136/bmjopen-2020-047748), 2022-01-11

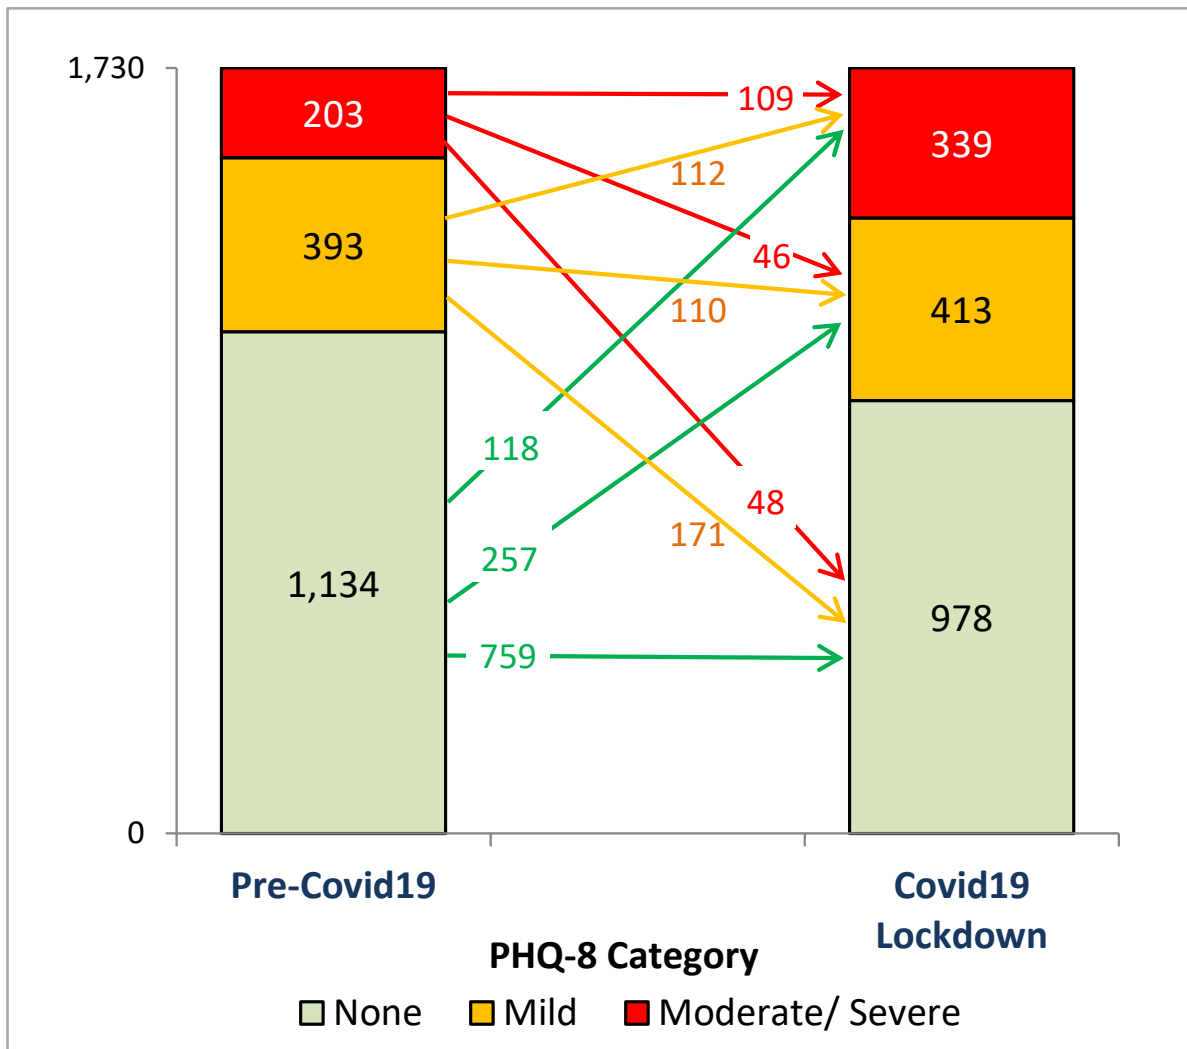

Supplement: bmjopen-2020-047748supp002.pdf [file bmjopen-2020-047748supp002.pdf]
